# Supplementary material
Source: publisher site journal article supplement (https://www.spandidos-publications.com/2472/downloadSupplementary)
Supplement: Supplementary file 1 [file downloadSupplementary]

## Sheet: Annotation_Combine
												Table SI. Protein annotation. MS/MS, tandem-mass spectrometry; KEGG, Kyoto Encyclopedia of Genes and Genomes; PEP, maximal posterior error probability for peptides; KO, KEGG orthologs; IPR, ID in InterPro website.
Protein accession	Position	Amino acid	Protein description	Gene name	Localization probability	PEP	Score	Modified sequence	Charge	Mass error [ppm]	MS/MS count	Cancer/normal ratio	Cancer/normal P-value	Subcellular localization	Biological process	Cellular component	Molecular function	KEGG KO no.	KEGG gene	KEGG pathway	IPR ID	Domain description
A0A087X1C5	135	S	Putative cytochrome P450 2D7	CYP2D7	0.99985	2.71e-05	139.78	RFS(1)VSTLR	3	-0.16645	8			endoplasmic reticulum	cellular response to xenobiotic stimulus; unsaturated fatty acid metabolic process; arachidonic acid metabolic process; fatty acid derivative metabolic process; single-organism process; cellular lipid metabolic process; response to stimulus; cellular metabolic process; organic substance metabolic process; response to drug; metabolic process; xenobiotic metabolic process; response to xenobiotic st…	organelle; intracellular membrane-bounded organelle; intracellular organelle; membrane; membrane part; cell part; intracellular; cytoplasm; intrinsic component of membrane; intracellular part; membrane-bounded organelle; cell; integral component of membrane; mitochondrion; cytoplasmic part;	iron ion binding; ion binding; oxidoreductase activity, acting on paired donors, with incorporation or reduction of molecular oxygen; oxidoreductase activity; heterocyclic compound binding; organic cyclic compound binding; heme binding; transition metal ion binding; catalytic activity; binding; cation binding; metal ion binding; aromatase activity; tetrapyrrole binding; monooxygenase activity; ox…	K17712	CYP2D6; cytochrome P450 family 2 subfamily D polypeptide 6 [EC:1.14.14.1]	hsa01522 Endocrine resistance - Homo sapiens (human); hsa00982 Drug metabolism - cytochrome P450 - Homo sapiens (human); hsa04726 Serotonergic synapse - Homo sapiens (human); hsa00980 Metabolism of xenobiotics by cytochrome P450 - Homo sapiens (human);
A0AV96	519	T	RNA-binding protein 47	RBM47	0.998784	4.27e-07	105.17	PIT(0.999)PVYT(0.001)VAPNVQR	2	-0.66287	4	1.154	0.466	nucleus	single-multicellular organism process; cytidine to uridine editing; cellular aromatic compound metabolic process; cellular developmental process; single-organism process; RNA modification; cellular metabolic process; organic substance metabolic process; metabolic process; cell differentiation; heterocycle metabolic process; nucleobase-containing compound metabolic process; cellular nitrogen compo…	organelle; intracellular membrane-bounded organelle; intracellular organelle; nucleus; cell part; intracellular; intracellular part; membrane-bounded organelle; cell;	organic cyclic compound binding; heterocyclic compound binding; RNA binding; nucleoside phosphate binding; binding; nucleic acid binding; nucleotide binding; small molecule binding;				IPR000504; IPR012677;	RNA recognition motif domain; Nucleotide-binding alpha-beta plait domain;
A0FGR8	738	S	Extended synaptotagmin-2	ESYT2	0.828297	1.44e-14	140.15	S(0.506)S(0.506)S(0.828)S(0.16)LLASPGHISVK	3	-0.41168	4	0.654	0.0901	nucleus	liposaccharide metabolic process; lipid transport; membrane lipid metabolic process; vesicle-mediated transport; glycosphingolipid metabolic process; glycolipid metabolic process; single-organism cellular process; nitrogen compound metabolic process; single-organism process; cellular lipid metabolic process; lipid localization; organic substance transport; endocytosis; primary metabolic process; …	membrane; nuclear outer membrane-endoplasmic reticulum membrane network; endoplasmic reticulum; extrinsic component of membrane; cell periphery; cytoplasm; intrinsic component of membrane; intracellular part; integral component of plasma membrane; extrinsic component of cytoplasmic side of plasma membrane; cell; cytoplasmic side of plasma membrane; cytoplasmic side of membrane; organelle part; me…	calcium-dependent phospholipid binding; ammonium ion binding; ion binding; protein binding; phosphatidylcholine binding; cell adhesion molecule binding; quaternary ammonium group binding; identical protein binding; binding; phospholipid binding; cadherin binding; phosphatidylinositol binding; lipid binding; metal ion binding; cation binding; anion binding; phosphatidylethanolamine binding; calciu…				IPR031468; IPR000008;	Synaptotagmin-like mitochondrial-lipid-binding domain; C2 domain;
A0FGR8	739	S	Extended synaptotagmin-2	ESYT2	0.870383	1.44e-14	140.15	S(0.237)S(0.237)S(0.651)S(0.87)LLAS(0.005)PGHISVK	3	0.085812	2	0.617	0.094	nucleus	liposaccharide metabolic process; lipid transport; membrane lipid metabolic process; vesicle-mediated transport; glycosphingolipid metabolic process; glycolipid metabolic process; single-organism cellular process; nitrogen compound metabolic process; single-organism process; cellular lipid metabolic process; lipid localization; organic substance transport; endocytosis; primary metabolic process; …	membrane; nuclear outer membrane-endoplasmic reticulum membrane network; endoplasmic reticulum; extrinsic component of membrane; cell periphery; cytoplasm; intrinsic component of membrane; intracellular part; integral component of plasma membrane; extrinsic component of cytoplasmic side of plasma membrane; cell; cytoplasmic side of plasma membrane; cytoplasmic side of membrane; organelle part; me…	calcium-dependent phospholipid binding; ammonium ion binding; ion binding; protein binding; phosphatidylcholine binding; cell adhesion molecule binding; quaternary ammonium group binding; identical protein binding; binding; phospholipid binding; cadherin binding; phosphatidylinositol binding; lipid binding; metal ion binding; cation binding; anion binding; phosphatidylethanolamine binding; calciu…				IPR031468; IPR000008;	Synaptotagmin-like mitochondrial-lipid-binding domain; C2 domain;
A0FGR8	758	S	Extended synaptotagmin-2	ESYT2	0.996496	3.15e-09	104.23	EPTPS(0.003)IAS(0.996)DISLPIATQELR	3	0.31151	4	0.693	0.256	nucleus	liposaccharide metabolic process; lipid transport; membrane lipid metabolic process; vesicle-mediated transport; glycosphingolipid metabolic process; glycolipid metabolic process; single-organism cellular process; nitrogen compound metabolic process; single-organism process; cellular lipid metabolic process; lipid localization; organic substance transport; endocytosis; primary metabolic process; …	membrane; nuclear outer membrane-endoplasmic reticulum membrane network; endoplasmic reticulum; extrinsic component of membrane; cell periphery; cytoplasm; intrinsic component of membrane; intracellular part; integral component of plasma membrane; extrinsic component of cytoplasmic side of plasma membrane; cell; cytoplasmic side of plasma membrane; cytoplasmic side of membrane; organelle part; me…	calcium-dependent phospholipid binding; ammonium ion binding; ion binding; protein binding; phosphatidylcholine binding; cell adhesion molecule binding; quaternary ammonium group binding; identical protein binding; binding; phospholipid binding; cadherin binding; phosphatidylinositol binding; lipid binding; metal ion binding; cation binding; anion binding; phosphatidylethanolamine binding; calciu…				IPR031468; IPR000008;	Synaptotagmin-like mitochondrial-lipid-binding domain; C2 domain;
A0FGR8	761	S	Extended synaptotagmin-2	ESYT2	0.99999	5.39e-31	156.36	EPTPSIASDIS(1)LPIATQELR	3	0.12288	1	0.597	0.0107	nucleus	liposaccharide metabolic process; lipid transport; membrane lipid metabolic process; vesicle-mediated transport; glycosphingolipid metabolic process; glycolipid metabolic process; single-organism cellular process; nitrogen compound metabolic process; single-organism process; cellular lipid metabolic process; lipid localization; organic substance transport; endocytosis; primary metabolic process; …	membrane; nuclear outer membrane-endoplasmic reticulum membrane network; endoplasmic reticulum; extrinsic component of membrane; cell periphery; cytoplasm; intrinsic component of membrane; intracellular part; integral component of plasma membrane; extrinsic component of cytoplasmic side of plasma membrane; cell; cytoplasmic side of plasma membrane; cytoplasmic side of membrane; organelle part; me…	calcium-dependent phospholipid binding; ammonium ion binding; ion binding; protein binding; phosphatidylcholine binding; cell adhesion molecule binding; quaternary ammonium group binding; identical protein binding; binding; phospholipid binding; cadherin binding; phosphatidylinositol binding; lipid binding; metal ion binding; cation binding; anion binding; phosphatidylethanolamine binding; calciu…				IPR031468; IPR000008;	Synaptotagmin-like mitochondrial-lipid-binding domain; C2 domain;
A0JNW5	418	S	UHRF1-binding protein 1-like	UHRF1BP1L	0.833478	2.13e-59	200.09	DHNVGSPPKS(0.833)PT(0.166)HASPQHTQTEK	5	-0.0088509	5			plasma membrane							IPR026854;	Vacuolar protein sorting-associated protein 13, N-terminal domain;
A0MZ66	506	S	Shootin-1	SHTN1	1	1.2e-05	97.183	S(1)MPVLGSVSSVTK	3	-0.11335	5	0.559	0.114	nucleus	single organism signaling; cellular component biogenesis; positive regulation of cell migration; regulation of biological quality; cell surface receptor signaling pathway; cellular component morphogenesis; positive regulation of growth; regulation of cell growth; cytoplasmic actin-based contraction involved in cell motility; actin cytoskeleton organization; positive regulation of multicellular or…	microtubule; cytoplasm; neuronal cell body; macromolecular complex; growth cone; supramolecular fiber; intracellular part; actin-based cell projection; cell; supramolecular complex; organelle part; non-membrane-bounded organelle; cytoskeleton; microtubule cytoskeleton; intracellular; cell part; lamellipodium; filopodium; perinuclear region of cytoplasm; neuron projection; neuron part; intracellul…	actin filament binding; cell adhesion molecule binding; cytoskeletal protein binding; kinesin binding; binding; cadherin binding; macromolecular complex binding; actin binding; protein binding; protein complex binding;
A1L170	18	S	Uncharacterized protein C1orf226	C1orf226	0.999642	0.002	79.148	S(1)FPHLSK	3	-1.237	1			nucleus
A1L170	223	S	Uncharacterized protein C1orf226	C1orf226	0.99792	5.53e-07	143.7	RAS(1)S(0.998)PS(0.002)LIER	3	-0.1211	8			nucleus
A1L170	222	S	Uncharacterized protein C1orf226	C1orf226	0.999975	2.34e-15	171.93	RAS(1)S(0.998)PS(0.002)LIER	3	-0.1211	7			nucleus
A1L390	643	S	Pleckstrin homology domain-containing family G member 3	PLEKHG3	0.999577	1.1e-05	107.82	SSSVLS(1)LEGS(1)EK	2	-0.24726	2			nucleus	regulation of cellular process; regulation of intracellular signal transduction; positive regulation of GTPase activity; regulation of signaling; regulation of Ras protein signal transduction; positive regulation of catalytic activity; regulation of cell communication; regulation of biological process; regulation of hydrolase activity; positive regulation of hydrolase activity; regulation of cata…		Ras guanyl-nucleotide exchange factor activity; molecular function regulator; guanyl-nucleotide exchange factor activity; Rho guanyl-nucleotide exchange factor activity;				IPR011993; IPR000219; IPR001849;	PH domain-like; Dbl homology (DH) domain; Pleckstrin homology domain;
A1L390	741	S	Pleckstrin homology domain-containing family G member 3	PLEKHG3	0.999456	0.000231	108.23	RRES(0.999)LS(0.001)YIPK	3	0.073795	5			nucleus	regulation of cellular process; regulation of intracellular signal transduction; positive regulation of GTPase activity; regulation of signaling; regulation of Ras protein signal transduction; positive regulation of catalytic activity; regulation of cell communication; regulation of biological process; regulation of hydrolase activity; positive regulation of hydrolase activity; regulation of cata…		Ras guanyl-nucleotide exchange factor activity; molecular function regulator; guanyl-nucleotide exchange factor activity; Rho guanyl-nucleotide exchange factor activity;				IPR011993; IPR000219; IPR001849;	PH domain-like; Dbl homology (DH) domain; Pleckstrin homology domain;
A1L390	1028	S	Pleckstrin homology domain-containing family G member 3	PLEKHG3	0.992946	0.000104	92.039	TT(0.003)S(0.993)PGGRPS(0.004)AR	2	0.28168	3			nucleus	regulation of cellular process; regulation of intracellular signal transduction; positive regulation of GTPase activity; regulation of signaling; regulation of Ras protein signal transduction; positive regulation of catalytic activity; regulation of cell communication; regulation of biological process; regulation of hydrolase activity; positive regulation of hydrolase activity; regulation of cata…		Ras guanyl-nucleotide exchange factor activity; molecular function regulator; guanyl-nucleotide exchange factor activity; Rho guanyl-nucleotide exchange factor activity;				IPR011993; IPR000219; IPR001849;	PH domain-like; Dbl homology (DH) domain; Pleckstrin homology domain;
A1L390	631	S	Pleckstrin homology domain-containing family G member 3	PLEKHG3	0.999966	0.0129	66.19	SSGFGS(1)PR	2	0.61878	2			nucleus	regulation of cellular process; regulation of intracellular signal transduction; positive regulation of GTPase activity; regulation of signaling; regulation of Ras protein signal transduction; positive regulation of catalytic activity; regulation of cell communication; regulation of biological process; regulation of hydrolase activity; positive regulation of hydrolase activity; regulation of cata…		Ras guanyl-nucleotide exchange factor activity; molecular function regulator; guanyl-nucleotide exchange factor activity; Rho guanyl-nucleotide exchange factor activity;				IPR011993; IPR000219; IPR001849;	PH domain-like; Dbl homology (DH) domain; Pleckstrin homology domain;
A1L390	647	S	Pleckstrin homology domain-containing family G member 3	PLEKHG3	1	2.74e-26	194.23	SSSVLS(1)LEGS(1)EK	2	-0.24726	6			nucleus	regulation of cellular process; regulation of intracellular signal transduction; positive regulation of GTPase activity; regulation of signaling; regulation of Ras protein signal transduction; positive regulation of catalytic activity; regulation of cell communication; regulation of biological process; regulation of hydrolase activity; positive regulation of hydrolase activity; regulation of cata…		Ras guanyl-nucleotide exchange factor activity; molecular function regulator; guanyl-nucleotide exchange factor activity; Rho guanyl-nucleotide exchange factor activity;				IPR011993; IPR000219; IPR001849;	PH domain-like; Dbl homology (DH) domain; Pleckstrin homology domain;
A2AJT9	17	S	Uncharacterized protein CXorf23	CXorf23	1	0.00521	80.219	S(1)LS(1)PVPR	2	-0.46944	2			nucleus		organelle; intracellular membrane-bounded organelle; intracellular organelle; cell part; intracellular; cytoplasm; intracellular part; membrane-bounded organelle; cell; mitochondrion; cytoplasmic part;
A2AJT9	15	S	Uncharacterized protein CXorf23	CXorf23	1	0.0331	53.597	S(1)LS(1)PVPR	2	-0.46944	1			nucleus		organelle; intracellular membrane-bounded organelle; intracellular organelle; cell part; intracellular; cytoplasm; intracellular part; membrane-bounded organelle; cell; mitochondrion; cytoplasmic part;
A2RRP1	475	S	Neuroblastoma-amplified sequence	NBAS	0.96518	8.73e-09	98.062	AGEEDEGEEDS(0.972)DS(0.965)DY(0.063)EISAK	3	-0.061402	2			nucleus	negative regulation of nuclear-transcribed mRNA catabolic process, nonsense-mediated decay; cellular metabolic process; negative regulation of RNA metabolic process; negative regulation of mRNA metabolic process; protein transport; establishment of localization; metabolic process; positive regulation of metabolic process; organic cyclic compound catabolic process; macromolecule metabolic process;…	intracellular organelle; membrane; nuclear outer membrane-endoplasmic reticulum membrane network; endoplasmic reticulum; intracellular organelle part; cytoplasm; macromolecular complex; endomembrane system; intracellular part; cytosol; cell; organelle part; intracellular membrane-bounded organelle; organelle; endoplasmic reticulum part; membrane part; Dsl1/NZR complex; intracellular; cell part; p…	SNARE binding; protein binding; binding;	K20473			IPR015943; IPR011044; IPR013244; IPR029145;	WD40/YVTN repeat-like-containing domain; Quinoprotein amine dehydrogenase, beta chain-like; Sec39 domain; Neuroblastoma-amplified sequence, N-terminal;
A2RRP1	473	S	Neuroblastoma-amplified sequence	NBAS	0.999474	7.36e-26	152.06	AGEEDEGEEDS(0.999)DS(0.001)DYEISAK	3	-0.18769	4	1.563	0.122	nucleus	negative regulation of nuclear-transcribed mRNA catabolic process, nonsense-mediated decay; cellular metabolic process; negative regulation of RNA metabolic process; negative regulation of mRNA metabolic process; protein transport; establishment of localization; metabolic process; positive regulation of metabolic process; organic cyclic compound catabolic process; macromolecule metabolic process;…	intracellular organelle; membrane; nuclear outer membrane-endoplasmic reticulum membrane network; endoplasmic reticulum; intracellular organelle part; cytoplasm; macromolecular complex; endomembrane system; intracellular part; cytosol; cell; organelle part; intracellular membrane-bounded organelle; organelle; endoplasmic reticulum part; membrane part; Dsl1/NZR complex; intracellular; cell part; p…	SNARE binding; protein binding; binding;	K20473			IPR015943; IPR011044; IPR013244; IPR029145;	WD40/YVTN repeat-like-containing domain; Quinoprotein amine dehydrogenase, beta chain-like; Sec39 domain; Neuroblastoma-amplified sequence, N-terminal;
A6ND36	650	S	Protein FAM83G	FAM83G	1	1.66e-05	128.46	QLS(1)APHITR	3	-0.19279	4			nucleus	regulation of cellular process; single organism signaling; cell surface receptor signaling pathway; regulation of macromolecule metabolic process; regulation of nucleobase-containing compound metabolic process; cellular response to organic substance; single-organism process; cellular response to growth factor stimulus; response to stimulus; regulation of RNA biosynthetic process; signal transduct…	organelle; intracellular membrane-bounded organelle; intracellular organelle; nucleus; cell part; intracellular; cytoplasm; intracellular part; cytosol; membrane-bounded organelle; cell; cytoplasmic part;	protein binding; binding;
A6ND36	356	S	Protein FAM83G	FAM83G	1	0.000602	107.17	AKS(1)VDEIAK	3	-0.29187	1			nucleus	regulation of cellular process; single organism signaling; cell surface receptor signaling pathway; regulation of macromolecule metabolic process; regulation of nucleobase-containing compound metabolic process; cellular response to organic substance; single-organism process; cellular response to growth factor stimulus; response to stimulus; regulation of RNA biosynthetic process; signal transduct…	organelle; intracellular membrane-bounded organelle; intracellular organelle; nucleus; cell part; intracellular; cytoplasm; intracellular part; cytosol; membrane-bounded organelle; cell; cytoplasmic part;	protein binding; binding;
A6ND36	760	S	Protein FAM83G	FAM83G	1	0.00178	78.548	LLPDPGS(1)PR	2	1.4721	3			nucleus	regulation of cellular process; single organism signaling; cell surface receptor signaling pathway; regulation of macromolecule metabolic process; regulation of nucleobase-containing compound metabolic process; cellular response to organic substance; single-organism process; cellular response to growth factor stimulus; response to stimulus; regulation of RNA biosynthetic process; signal transduct…	organelle; intracellular membrane-bounded organelle; intracellular organelle; nucleus; cell part; intracellular; cytoplasm; intracellular part; cytosol; membrane-bounded organelle; cell; cytoplasmic part;	protein binding; binding;
A6ND91	168	S	Putative L-aspartate dehydrogenase	ASPDH	1	1.36e-59	204.61	LEGPLAAAHS(1)PGPCTVLYEGPVR	3	-0.15144	7	0.723	0.184	mitochondria	cofactor biosynthetic process; NADP metabolic process; pyridine nucleotide metabolic process; NADP catabolic process; nucleotide metabolic process; single-organism process; biosynthetic process; pyridine nucleotide biosynthetic process; cellular metabolic process; pyridine-containing compound metabolic process; phosphate-containing compound metabolic process; pyridine-containing compound biosynth…		organic cyclic compound binding; heterocyclic compound binding; nucleoside phosphate binding; catalytic activity; binding; aspartate dehydrogenase activity; NADP binding; oxidoreductase activity, acting on the CH-NH2 group of donors; nucleotide binding; cofactor binding; oxidoreductase activity; coenzyme binding; small molecule binding;				IPR016040; IPR002811; IPR005106;	NAD(P)-binding domain; Aspartate dehydrogenase; Aspartate/homoserine dehydrogenase, NAD-binding;
A6NDB9	439	S	Paralemmin-3	PALM3	0.999409	6.19e-07	114.96	KLELES(0.001)RGS(0.999)AEK	4	-0.55314	7	0.579	0.00915	nucleus	regulation of cellular process; single organism signaling; negative regulation of signal transduction; cell surface receptor signaling pathway; regulation of signaling; regulation of cytokine-mediated signaling pathway; response to oxygen-containing compound; single-organism process; negative regulation of biological process; negative regulation of cellular process; response to external biotic st…	membrane; intracellular; cell part; cell periphery; cytoplasm; intracellular part; cell; plasma membrane;	ATP binding; nucleoside phosphate binding; nucleoside binding; ion binding; protein binding; nucleotide binding; organic cyclic compound binding; heterocyclic compound binding; ribonucleoside binding; carbohydrate derivative binding; ribonucleotide binding; binding; purine ribonucleoside binding; anion binding; purine ribonucleotide binding; adenyl ribonucleotide binding; adenyl nucleotide bindin…
A6NDB9	155	S	Paralemmin-3	PALM3	0.944782	3.2e-06	75.868	AS(0.002)LPAGLVGT(0.998)PPES(0.945)PS(0.055)EPR	3	-0.51033	10	1.559	0.00274	nucleus	regulation of cellular process; single organism signaling; negative regulation of signal transduction; cell surface receptor signaling pathway; regulation of signaling; regulation of cytokine-mediated signaling pathway; response to oxygen-containing compound; single-organism process; negative regulation of biological process; negative regulation of cellular process; response to external biotic st…	membrane; intracellular; cell part; cell periphery; cytoplasm; intracellular part; cell; plasma membrane;	ATP binding; nucleoside phosphate binding; nucleoside binding; ion binding; protein binding; nucleotide binding; organic cyclic compound binding; heterocyclic compound binding; ribonucleoside binding; carbohydrate derivative binding; ribonucleotide binding; binding; purine ribonucleoside binding; anion binding; purine ribonucleotide binding; adenyl ribonucleotide binding; adenyl nucleotide bindin…
A6NDB9	375	S	Paralemmin-3	PALM3	1	6.8e-07	99.092	GDES(1)PLGAEGAK	3	-1.6035	2	1.106	0.267	nucleus	regulation of cellular process; single organism signaling; negative regulation of signal transduction; cell surface receptor signaling pathway; regulation of signaling; regulation of cytokine-mediated signaling pathway; response to oxygen-containing compound; single-organism process; negative regulation of biological process; negative regulation of cellular process; response to external biotic st…	membrane; intracellular; cell part; cell periphery; cytoplasm; intracellular part; cell; plasma membrane;	ATP binding; nucleoside phosphate binding; nucleoside binding; ion binding; protein binding; nucleotide binding; organic cyclic compound binding; heterocyclic compound binding; ribonucleoside binding; carbohydrate derivative binding; ribonucleotide binding; binding; purine ribonucleoside binding; anion binding; purine ribonucleotide binding; adenyl ribonucleotide binding; adenyl nucleotide bindin…
A6NDB9	151	T	Paralemmin-3	PALM3	0.99991	1.06e-24	143.4	ASLPAGLVGT(1)PPESPSEPR	3	-0.22821	37	1.101	0.335	nucleus	regulation of cellular process; single organism signaling; negative regulation of signal transduction; cell surface receptor signaling pathway; regulation of signaling; regulation of cytokine-mediated signaling pathway; response to oxygen-containing compound; single-organism process; negative regulation of biological process; negative regulation of cellular process; response to external biotic st…	membrane; intracellular; cell part; cell periphery; cytoplasm; intracellular part; cell; plasma membrane;	ATP binding; nucleoside phosphate binding; nucleoside binding; ion binding; protein binding; nucleotide binding; organic cyclic compound binding; heterocyclic compound binding; ribonucleoside binding; carbohydrate derivative binding; ribonucleotide binding; binding; purine ribonucleoside binding; anion binding; purine ribonucleotide binding; adenyl ribonucleotide binding; adenyl nucleotide bindin…
A6NDB9	303	S	Paralemmin-3	PALM3	0.99314	1.6e-12	155.09	VPEVVQTS(0.007)S(0.993)PR	3	0.41479	12	0.907	0.523	nucleus	regulation of cellular process; single organism signaling; negative regulation of signal transduction; cell surface receptor signaling pathway; regulation of signaling; regulation of cytokine-mediated signaling pathway; response to oxygen-containing compound; single-organism process; negative regulation of biological process; negative regulation of cellular process; response to external biotic st…	membrane; intracellular; cell part; cell periphery; cytoplasm; intracellular part; cell; plasma membrane;	ATP binding; nucleoside phosphate binding; nucleoside binding; ion binding; protein binding; nucleotide binding; organic cyclic compound binding; heterocyclic compound binding; ribonucleoside binding; carbohydrate derivative binding; ribonucleotide binding; binding; purine ribonucleoside binding; anion binding; purine ribonucleotide binding; adenyl ribonucleotide binding; adenyl nucleotide bindin…
A6NDB9	420	S	Paralemmin-3	PALM3	0.835252	3.53e-05	42.669	AEES(0.001)MGIGS(0.008)EEKPGT(0.156)GRDEAEMS(0.835)PVVER	4	0.030228	1	0.692	0.552	nucleus	regulation of cellular process; single organism signaling; negative regulation of signal transduction; cell surface receptor signaling pathway; regulation of signaling; regulation of cytokine-mediated signaling pathway; response to oxygen-containing compound; single-organism process; negative regulation of biological process; negative regulation of cellular process; response to external biotic st…	membrane; intracellular; cell part; cell periphery; cytoplasm; intracellular part; cell; plasma membrane;	ATP binding; nucleoside phosphate binding; nucleoside binding; ion binding; protein binding; nucleotide binding; organic cyclic compound binding; heterocyclic compound binding; ribonucleoside binding; carbohydrate derivative binding; ribonucleotide binding; binding; purine ribonucleoside binding; anion binding; purine ribonucleotide binding; adenyl ribonucleotide binding; adenyl nucleotide bindin…
A6NDB9	143	S	Paralemmin-3	PALM3	1	1.2e-12	115.45	RAS(1)LPAGLVGTPPESPSEPR	3	-0.068529	7	1.399	0.0056	nucleus	regulation of cellular process; single organism signaling; negative regulation of signal transduction; cell surface receptor signaling pathway; regulation of signaling; regulation of cytokine-mediated signaling pathway; response to oxygen-containing compound; single-organism process; negative regulation of biological process; negative regulation of cellular process; response to external biotic st…	membrane; intracellular; cell part; cell periphery; cytoplasm; intracellular part; cell; plasma membrane;	ATP binding; nucleoside phosphate binding; nucleoside binding; ion binding; protein binding; nucleotide binding; organic cyclic compound binding; heterocyclic compound binding; ribonucleoside binding; carbohydrate derivative binding; ribonucleotide binding; binding; purine ribonucleoside binding; anion binding; purine ribonucleotide binding; adenyl ribonucleotide binding; adenyl nucleotide bindin…
A6NEL2	271	S	Ankyrin repeat domain-containing protein SOWAHB	SOWAHB	1	7.18e-06	108.34	AS(1)PPALLPGPAPR	3	0.11372	5			nucleus			protein binding; binding;				IPR020683;	Ankyrin repeat-containing domain;
A6NFI3	112	S	Zinc finger protein 316	ZNF316	1	0.00779	49.343	GGDAKS(1)PVLQEK	3	-1.2042	1			nucleus	regulation of cellular process; cellular aromatic compound metabolic process; nucleic acid-templated transcription; regulation of macromolecule metabolic process; regulation of nucleobase-containing compound metabolic process; biosynthetic process; cellular metabolic process; organic substance metabolic process; regulation of RNA biosynthetic process; metabolic process; heterocycle metabolic proc…	organelle; intracellular membrane-bounded organelle; intracellular organelle; nucleus; cell part; intracellular; intracellular part; membrane-bounded organelle; cell;	organic cyclic compound binding; heterocyclic compound binding; DNA binding; binding; nucleic acid binding; ion binding; cation binding; metal ion binding;	K09228			IPR015880; IPR007087; IPR001909; IPR013087;	Zinc finger, C2H2-like; Zinc finger, C2H2; Krueppel-associated box; Zinc finger C2H2-type/integrase DNA-binding domain;
A6NI79	247	T	Coiled-coil domain-containing protein 69	CCDC69	0.975914	0.000136	68.676	QLS(0.024)EDLLLT(0.976)R	2	-0.016419	1			nucleus
A6NKD9	246	S	Coiled-coil domain-containing protein 85C	CCDC85C	0.998089	0.000203	74.649	S(0.998)LDDLS(0.002)APPHHR	3	-0.46114	1			nucleus	developmental process; pallium development; nervous system development; single-multicellular organism process; brain development; system development; single-organism process; cerebral cortex development; multicellular organismal process; telencephalon development; animal organ development; single-organism developmental process; central nervous system development; head development; forebrain devel…	occluding junction; cell-cell junction; bicellular tight junction; cell junction; apical junction complex;
A7E2V4	1092	S	Zinc finger SWIM domain-containing protein 8	ZSWIM8	0.996795	1.98e-11	72.725	NVPES(0.001)S(0.002)PHS(0.997)PCEGLPSEAALTPRPEGK	4	0.06579	2			plasma membrane			metal ion binding; cation binding; zinc ion binding; transition metal ion binding; binding; ion binding;				IPR007527;	Zinc finger, SWIM-type;
A7KAX9	892	S	Rho GTPase-activating protein 32	ARHGAP32	1	0.000275	99.815	VVYAFS(1)PK	3	0.32677	2			nucleus	regulation of cellular process; single organism signaling; cellular response to stimulus; regulation of intracellular signal transduction; intracellular signal transduction; positive regulation of GTPase activity; regulation of signaling; single-organism process; small GTPase mediated signal transduction; signaling; response to stimulus; positive regulation of catalytic activity; signal transduct…	dendrite; membrane; organelle membrane; cytoplasmic region; cytoplasm; cytoplasmic vesicle part; cell; dendritic spine; organelle part; non-membrane-bounded organelle; nucleoplasm; plasma membrane region; intracellular; postsynaptic density; synaptic membrane; neuron projection; membrane-bounded organelle; neuron part; endoplasmic reticulum membrane; organelle lumen; endosome membrane; cell proje…	enzyme regulator activity; nucleoside-triphosphatase regulator activity; binding; GTPase regulator activity; phosphatidylinositol binding; phospholipid binding; ion binding; lipid binding; protein binding; anion binding; molecular function regulator; enzyme activator activity; GTPase activator activity;	K20647			IPR001452; IPR008936; IPR001683; IPR000198;	SH3 domain; Rho GTPase activation protein; Phox homologous domain; Rho GTPase-activating protein domain;
A8CG34	358	S	Nuclear envelope pore membrane protein POM 121C	POM121C	0.81126	0.000208	66.826	GLNSQS(0.189)S(0.811)DDHLNKR	4	-0.011194	1			plasma membrane	RNA transport; nuclear transport; cellular metabolic process; protein transport; multi-organism intracellular transport; metabolic process; multi-organism metabolic process; regulation of localization; nucleobase-containing compound transport; protein localization to organelle; protein metabolic process; macromolecule metabolic process; protein import into nucleus; intracellular transport of viru…	intracellular organelle; membrane; nuclear outer membrane-endoplasmic reticulum membrane network; nuclear pore; endoplasmic reticulum; organelle membrane; nuclear envelope; intracellular organelle part; organelle envelope; cytoplasm; intrinsic component of membrane; macromolecular complex; endomembrane system; intracellular part; cell; integral component of membrane; organelle part; intracellular…	signal sequence binding; nucleocytoplasmic transporter activity; peptide binding; binding; nuclear localization sequence binding; protein binding; amide binding; structural constituent of nuclear pore; structural molecule activity; transporter activity;	K14316	POM121; nuclear pore complex protein Nup121	hsa03013 RNA transport - Homo sapiens (human);
A8MVU1	296	S	Putative neutrophil cytosol factor 1C	NCF1C	0.999999	0.000965	83.081	RLS(1)QDAYR	3	-0.007493	3			nucleus	cellular component biogenesis; superoxide metabolic process; cellular component organization; protein complex subunit organization; oxidation-reduction process; single-organism process; cellular metabolic process; positive regulation of catalytic activity; macromolecular complex subunit organization; podosome assembly; metabolic process; reactive oxygen species metabolic process; organelle assemb…	intracellular organelle; intracellular non-membrane-bounded organelle; cytoskeletal part; intracellular organelle part; cytoplasm; macromolecular complex; intracellular part; podosome; cell; actin cytoskeleton; organelle part; non-membrane-bounded organelle; cytoskeleton; organelle; intracellular; cell part; protein complex;	oxidoreductase activity, acting on NAD(P)H; ion binding; protein binding; molecular function regulator; superoxide-generating NADPH oxidase activity; oxidoreductase activity; enzyme regulator activity; catalytic activity; binding; phospholipid binding; phosphatidylinositol binding; lipid binding; superoxide-generating NADPH oxidase activator activity; anion binding; oxidoreductase activity, actin…				IPR001452; IPR015039; IPR001683; IPR032136;	SH3 domain; NADPH oxidase subunit p47Phox, C-terminal; Phox homologous domain; Neutrophil cytosol factor 1, C-terminal;
A8MXY4	241	S	Zinc finger protein 99	ZNF99	0.952206	0.00916	50.46	AFNIS(0.952)S(0.042)MFT(0.005)K	3	2.39	1			nucleus	regulation of cellular process; cellular aromatic compound metabolic process; nucleic acid-templated transcription; regulation of macromolecule metabolic process; regulation of nucleobase-containing compound metabolic process; biosynthetic process; cellular metabolic process; organic substance metabolic process; regulation of RNA biosynthetic process; metabolic process; heterocycle metabolic proc…	organelle; intracellular membrane-bounded organelle; intracellular organelle; nucleus; cell part; intracellular; intracellular part; membrane-bounded organelle; cell;	organic cyclic compound binding; heterocyclic compound binding; DNA binding; binding; nucleic acid binding; ion binding; cation binding; metal ion binding;	K09228			IPR015880; IPR007087; IPR001909; IPR013087;	Zinc finger, C2H2-like; Zinc finger, C2H2; Krueppel-associated box; Zinc finger C2H2-type/integrase DNA-binding domain;
B2RUZ4	27	S	Small integral membrane protein 1	SMIM1	0.822476	6.8e-11	117.84	DGVSLGAVS(0.822)S(0.154)T(0.023)EEASR	3	0.15421	1			plasma membrane		membrane; extracellular region part; cell periphery; vesicle; intrinsic component of membrane; cell; integral component of membrane; extracellular region; plasma membrane; organelle; extracellular exosome; membrane part; cell part; extracellular vesicle; membrane-bounded organelle; extracellular organelle;
B2RUZ4	22	S	Small integral membrane protein 1	SMIM1	0.999663	6.85e-07	99.273	DGVS(1)LGAVSSTEEASR	2	-0.26792	2			plasma membrane		membrane; extracellular region part; cell periphery; vesicle; intrinsic component of membrane; cell; integral component of membrane; extracellular region; plasma membrane; organelle; extracellular exosome; membrane part; cell part; extracellular vesicle; membrane-bounded organelle; extracellular organelle;
C9J069	448	S	Uncharacterized protein C9orf172	C9orf172	1	0.000103	104.95	S(1)WDNILAPGPR	2	-0.11539	1			nucleus
C9J069	856	S	Uncharacterized protein C9orf172	C9orf172	1	5.32e-05	84.375	VALAAGS(1)PARPPPAR	3	-0.25202	1			nucleus
C9JI98	124	S	Transmembrane protein 238	TMEM238	1	3e-09	150.85	RWS(1)APAAAGQR	3	0.05473	2			plasma membrane		intrinsic component of membrane; membrane; integral component of membrane; membrane part;
C9JI98	154	S	Transmembrane protein 238	TMEM238	1	0.00656	52.5	APPPPAAGS(1)RR	3	0.13099	1			plasma membrane		intrinsic component of membrane; membrane; integral component of membrane; membrane part;
C9JI98	175	S	Transmembrane protein 238	TMEM238	1	1.82e-05	72.568	LQLATLEAGPGAAGAGS(1)E	3	0.21271	2			plasma membrane		intrinsic component of membrane; membrane; integral component of membrane; membrane part;
C9JLW8	21	S	Mapk-regulated corepressor-interacting protein 1	MCRIP1	0.974363	1.85e-16	127.93	S(0.974)PPS(0.025)S(0.001)S(0.001)EIFTPAHEENVR	3	0.10836	4			nucleus	regulation of cellular process; regulation of epithelial to mesenchymal transition; regulation of biological process; regulation of developmental process; regulation of multicellular organismal process; regulation of multicellular organismal development; biological regulation; regulation of cell differentiation;	cytoplasmic stress granule; intracellular organelle; intracellular non-membrane-bounded organelle; cytoplasm; macromolecular complex; intracellular part; cell; cytoplasmic ribonucleoprotein granule; non-membrane-bounded organelle; intracellular membrane-bounded organelle; organelle; nucleus; cell part; intracellular; ribonucleoprotein granule; ribonucleoprotein complex; membrane-bounded organelle…	protein binding; binding;
I3L1I5	155	S	Putative uncharacterized protein LOC100996504	---	0.986595	0.00848	57.434	S(0.987)VPVS(0.013)FY(0.001)EIR	2	0.32053	1			cytoplasm		intrinsic component of membrane; membrane; integral component of membrane; membrane part;
O00116	65	S	Alkyldihydroxyacetonephosphate synthase, peroxisomal	AGPS	0.999167	1.67e-44	173.36	AAS(0.999)AAT(0.001)AAPTATPAAQESGTIPK	4	0.47255	7	0.864	0.434	cytoplasm	ether lipid biosynthetic process; single-organism biosynthetic process; oxidation-reduction process; small molecule metabolic process; glycerol ether biosynthetic process; single-organism cellular process; ether lipid metabolic process; single-organism process; ether metabolic process; cellular lipid metabolic process; biosynthetic process; primary metabolic process; cellular metabolic process; o…	membrane; organelle membrane; cytoplasm; microbody part; intracellular part; cell; organelle part; peroxisomal membrane; non-membrane-bounded organelle; membrane-enclosed lumen; intracellular organelle lumen; peroxisomal matrix; intracellular; cell part; whole membrane; microbody; membrane-bounded organelle; organelle lumen; intracellular organelle; microbody membrane; peroxisomal part; bounding …	nucleoside phosphate binding; flavin adenine dinucleotide binding; ion binding; protein binding; nucleotide binding; cofactor binding; oxidoreductase activity; FAD binding; oxidoreductase activity, acting on CH-OH group of donors; heterocyclic compound binding; organic cyclic compound binding; alkylglycerone-phosphate synthase activity; catalytic activity; binding; transferase activity, transferr…	K00803	AGPS; alkyldihydroxyacetonephosphate synthase [EC:2.5.1.26]	hsa01100 Metabolic pathways - Homo sapiens (human); hsa00565 Ether lipid metabolism - Homo sapiens (human); hsa04146 Peroxisome - Homo sapiens (human);	IPR016166; IPR004113; IPR016169; IPR016164; IPR016167; IPR006094;	FAD-binding, type 2; FAD-linked oxidase, C-terminal; CO dehydrogenase flavoprotein-like, FAD-binding, subdomain 2; FAD-linked oxidase-like, C-terminal; FAD-binding, type 2, subdomain 1; FAD linked oxidase, N-terminal;
O00151	90	S	PDZ and LIM domain protein 1	PDLIM1	0.999482	1.04e-06	124.51	VWS(0.999)PLVT(0.001)EEGKR	3	0.032368	3	0.925	0.831	cytoplasm	regulation of cellular process; regulation of gene expression; regulation of transcription, DNA-templated; response to stress; regulation of cellular biosynthetic process; regulation of primary metabolic process; response to abiotic stimulus; regulation of macromolecule metabolic process; regulation of nucleobase-containing compound metabolic process; cell-cell adhesion; regulation of macromolecu…	intracellular organelle; intracellular non-membrane-bounded organelle; cell junction; cytoplasm; anchoring junction; macromolecular complex; intracellular part; cell-cell adherens junction; transcription factor complex; cell-cell junction; cell; non-membrane-bounded organelle; organelle; cytoskeleton; focal adhesion; intracellular; cell part; adherens junction; cell-substrate junction; protein co…	ion binding; protein binding; zinc ion binding; transcription cofactor activity; protein binding involved in cell-cell adhesion; cell adhesion molecule binding; cadherin binding involved in cell-cell adhesion; protein binding involved in cell adhesion; transition metal ion binding; binding; cadherin binding; transcription factor activity, transcription factor binding; cation binding; metal ion bi…				IPR001781; IPR006643; IPR001478; IPR031847;	Zinc finger, LIM-type; Zasp-like motif; PDZ domain; Domain of unknown function DUF4749;
O00159	408	S	Unconventional myosin-Ic	MYO1C	0.999177	0.00082	123.29	DVES(0.999)PS(0.001)WR	2	-0.68715	1			cytoplasm	single organism signaling; RNA transport; regulation of biological quality; positive regulation of cell migration; cell surface receptor signaling pathway; regulation of protein targeting; regulation of actin filament length; protein transport; nucleobase-containing compound transport; regulation of localization; regulation of cellular component size; response to growth factor; regulation of cyto…	membrane; extracellular region part; cluster of actin-based cell projections; membrane microdomain; ruffle membrane; cytoplasm; macromolecular complex; actin-based cell projection; supramolecular complex; cell; organelle part; non-membrane-bounded organelle; extracellular exosome; nucleoplasm; plasma membrane region; leading edge membrane; intracellular; membrane region; myosin complex; membrane-…	actin filament binding; nucleoside phosphate binding; motor activity; receptor binding; hydrolase activity, acting on acid anhydrides; hydrolase activity; protein binding; Ral GTPase binding; ATPase activity; heterocyclic compound binding; organic cyclic compound binding; cytoskeletal protein binding; pyrophosphatase activity; ribonucleotide binding; Ras GTPase binding; catalytic activity; bindin…	K10356			IPR010926; IPR027417; IPR001609;	Class I myosin tail homology domain; P-loop containing nucleoside triphosphate hydrolase; Myosin head, motor domain;
O00159	864	S	Unconventional myosin-Ic	MYO1C	0.964712	0.000386	91.318	S(0.035)IS(0.965)PEWK	2	-1.8019	3	0.802	0.186	cytoplasm	single organism signaling; RNA transport; regulation of biological quality; positive regulation of cell migration; cell surface receptor signaling pathway; regulation of protein targeting; regulation of actin filament length; protein transport; nucleobase-containing compound transport; regulation of localization; regulation of cellular component size; response to growth factor; regulation of cyto…	membrane; extracellular region part; cluster of actin-based cell projections; membrane microdomain; ruffle membrane; cytoplasm; macromolecular complex; actin-based cell projection; supramolecular complex; cell; organelle part; non-membrane-bounded organelle; extracellular exosome; nucleoplasm; plasma membrane region; leading edge membrane; intracellular; membrane region; myosin complex; membrane-…	actin filament binding; nucleoside phosphate binding; motor activity; receptor binding; hydrolase activity, acting on acid anhydrides; hydrolase activity; protein binding; Ral GTPase binding; ATPase activity; heterocyclic compound binding; organic cyclic compound binding; cytoskeletal protein binding; pyrophosphatase activity; ribonucleotide binding; Ras GTPase binding; catalytic activity; bindin…	K10356			IPR010926; IPR027417; IPR001609;	Class I myosin tail homology domain; P-loop containing nucleoside triphosphate hydrolase; Myosin head, motor domain;
O00159	29	S	Unconventional myosin-Ic	MYO1C	1	0.0346	51.286	LALGS(1)DGVR	2	1.1221	1	0.742	0.393	cytoplasm	single organism signaling; RNA transport; regulation of biological quality; positive regulation of cell migration; cell surface receptor signaling pathway; regulation of protein targeting; regulation of actin filament length; protein transport; nucleobase-containing compound transport; regulation of localization; regulation of cellular component size; response to growth factor; regulation of cyto…	membrane; extracellular region part; cluster of actin-based cell projections; membrane microdomain; ruffle membrane; cytoplasm; macromolecular complex; actin-based cell projection; supramolecular complex; cell; organelle part; non-membrane-bounded organelle; extracellular exosome; nucleoplasm; plasma membrane region; leading edge membrane; intracellular; membrane region; myosin complex; membrane-…	actin filament binding; nucleoside phosphate binding; motor activity; receptor binding; hydrolase activity, acting on acid anhydrides; hydrolase activity; protein binding; Ral GTPase binding; ATPase activity; heterocyclic compound binding; organic cyclic compound binding; cytoskeletal protein binding; pyrophosphatase activity; ribonucleotide binding; Ras GTPase binding; catalytic activity; bindin…	K10356			IPR010926; IPR027417; IPR001609;	Class I myosin tail homology domain; P-loop containing nucleoside triphosphate hydrolase; Myosin head, motor domain;
O00159	343	S	Unconventional myosin-Ic	MYO1C	0.999728	0.000677	82.705	LLS(1)VEGSTLR	2	0.051692	1			cytoplasm	single organism signaling; RNA transport; regulation of biological quality; positive regulation of cell migration; cell surface receptor signaling pathway; regulation of protein targeting; regulation of actin filament length; protein transport; nucleobase-containing compound transport; regulation of localization; regulation of cellular component size; response to growth factor; regulation of cyto…	membrane; extracellular region part; cluster of actin-based cell projections; membrane microdomain; ruffle membrane; cytoplasm; macromolecular complex; actin-based cell projection; supramolecular complex; cell; organelle part; non-membrane-bounded organelle; extracellular exosome; nucleoplasm; plasma membrane region; leading edge membrane; intracellular; membrane region; myosin complex; membrane-…	actin filament binding; nucleoside phosphate binding; motor activity; receptor binding; hydrolase activity, acting on acid anhydrides; hydrolase activity; protein binding; Ral GTPase binding; ATPase activity; heterocyclic compound binding; organic cyclic compound binding; cytoskeletal protein binding; pyrophosphatase activity; ribonucleotide binding; Ras GTPase binding; catalytic activity; bindin…	K10356			IPR010926; IPR027417; IPR001609;	Class I myosin tail homology domain; P-loop containing nucleoside triphosphate hydrolase; Myosin head, motor domain;
O00161	110	S	Synaptosomal-associated protein 23	SNAP23	0.999975	1.07e-05	90.896	TTWGDGGENS(1)PCNVVSK	3	-0.64649	1	0.884	0.766	cytoplasm	cellular component biogenesis; single organism signaling; mast cell activation involved in immune response; hormone transport; regulation of biological quality; leukocyte activation; neurotransmitter secretion; protein transport; vesicle-mediated transport in synapse; synaptic vesicle fusion to presynaptic active zone membrane; production of molecular mediator involved in inflammatory response; m…	membrane; extracellular region part; organelle membrane; cytoplasm; cytoplasmic vesicle part; macromolecular complex; cell-cell adherens junction; cell; organelle part; extracellular exosome; nucleoplasm; focal adhesion; intracellular; lysosome; secretory vesicle; neuron projection; cell-substrate junction; membrane-bounded organelle; SNARE complex; neuron part; cell-substrate adherens junction; …	SNARE binding; SNAP receptor activity; protein binding; syntaxin binding; binding;	K08508	SNAP23; synaptosomal-associated protein 23	hsa04611 Platelet activation - Homo sapiens (human); hsa04130 SNARE interactions in vesicular transport - Homo sapiens (human);	IPR000928; IPR000727;	SNAP-25; Target SNARE coiled-coil homology domain;
O00161	20	S	Synaptosomal-associated protein 23	SNAP23	0.999434	9.69e-08	114.63	AHQITDES(0.999)LESTRR	3	1.1862	3	0.693	0.0915	cytoplasm	cellular component biogenesis; single organism signaling; mast cell activation involved in immune response; hormone transport; regulation of biological quality; leukocyte activation; neurotransmitter secretion; protein transport; vesicle-mediated transport in synapse; synaptic vesicle fusion to presynaptic active zone membrane; production of molecular mediator involved in inflammatory response; m…	membrane; extracellular region part; organelle membrane; cytoplasm; cytoplasmic vesicle part; macromolecular complex; cell-cell adherens junction; cell; organelle part; extracellular exosome; nucleoplasm; focal adhesion; intracellular; lysosome; secretory vesicle; neuron projection; cell-substrate junction; membrane-bounded organelle; SNARE complex; neuron part; cell-substrate adherens junction; …	SNARE binding; SNAP receptor activity; protein binding; syntaxin binding; binding;	K08508	SNAP23; synaptosomal-associated protein 23	hsa04611 Platelet activation - Homo sapiens (human); hsa04130 SNARE interactions in vesicular transport - Homo sapiens (human);	IPR000928; IPR000727;	SNAP-25; Target SNARE coiled-coil homology domain;
O00168	83	S	Phospholemman	FXYD1	0.934453	0.000124	65.16	TGEPDEEEGT(0.238)FRS(0.827)S(0.934)IR	3	-0.36266	4			plasma membrane	inorganic anion transmembrane transport; regulation of biological quality; muscle system process; regulation of sodium ion transport; positive regulation of transmembrane transport; ion transmembrane transport; regulation of signaling; regulation of blood circulation; chloride transport; regulation of heart contraction; anion transmembrane transport; regulation of multicellular organismal process…	membrane; intrinsic component of plasma membrane; cell periphery; macromolecular complex; intrinsic component of membrane; integral component of plasma membrane; transmembrane transporter complex; cell; cation-transporting ATPase complex; integral component of membrane; ATPase dependent transmembrane transport complex; plasma membrane; catalytic complex; plasma membrane part; cell part; membrane …	ion transmembrane transporter activity; passive transmembrane transporter activity; anion channel activity; substrate-specific transporter activity; protein binding; sodium channel regulator activity; chloride channel activity; molecular function regulator; channel activity; inorganic anion transmembrane transporter activity; substrate-specific transmembrane transporter activity; chloride transme…	K13360	FXYD1; FXYD domain-containing ion transport regulator 1	hsa04024 cAMP signaling pathway - Homo sapiens (human);
O00168	79	T	Phospholemman	FXYD1	0.995757	0.000207	82.609	TGEPDEEEGT(0.996)FRS(0.675)S(0.329)IR	3	0.029028	3			plasma membrane	inorganic anion transmembrane transport; regulation of biological quality; muscle system process; regulation of sodium ion transport; positive regulation of transmembrane transport; ion transmembrane transport; regulation of signaling; regulation of blood circulation; chloride transport; regulation of heart contraction; anion transmembrane transport; regulation of multicellular organismal process…	membrane; intrinsic component of plasma membrane; cell periphery; macromolecular complex; intrinsic component of membrane; integral component of plasma membrane; transmembrane transporter complex; cell; cation-transporting ATPase complex; integral component of membrane; ATPase dependent transmembrane transport complex; plasma membrane; catalytic complex; plasma membrane part; cell part; membrane …	ion transmembrane transporter activity; passive transmembrane transporter activity; anion channel activity; substrate-specific transporter activity; protein binding; sodium channel regulator activity; chloride channel activity; molecular function regulator; channel activity; inorganic anion transmembrane transporter activity; substrate-specific transmembrane transporter activity; chloride transme…	K13360	FXYD1; FXYD domain-containing ion transport regulator 1	hsa04024 cAMP signaling pathway - Homo sapiens (human);
O00168	82	S	Phospholemman	FXYD1	0.945922	1.04e-10	117.3	TGEPDEEEGT(0.123)FRS(0.946)S(0.931)IR	3	-0.66654	7			plasma membrane	inorganic anion transmembrane transport; regulation of biological quality; muscle system process; regulation of sodium ion transport; positive regulation of transmembrane transport; ion transmembrane transport; regulation of signaling; regulation of blood circulation; chloride transport; regulation of heart contraction; anion transmembrane transport; regulation of multicellular organismal process…	membrane; intrinsic component of plasma membrane; cell periphery; macromolecular complex; intrinsic component of membrane; integral component of plasma membrane; transmembrane transporter complex; cell; cation-transporting ATPase complex; integral component of membrane; ATPase dependent transmembrane transport complex; plasma membrane; catalytic complex; plasma membrane part; cell part; membrane …	ion transmembrane transporter activity; passive transmembrane transporter activity; anion channel activity; substrate-specific transporter activity; protein binding; sodium channel regulator activity; chloride channel activity; molecular function regulator; channel activity; inorganic anion transmembrane transporter activity; substrate-specific transmembrane transporter activity; chloride transme…	K13360	FXYD1; FXYD domain-containing ion transport regulator 1	hsa04024 cAMP signaling pathway - Homo sapiens (human);
O00186	587	S	Syntaxin-binding protein 3	STXBP3	1	0.0137	52.891	DKVS(1)LIKDE	3	-0.48419	1	0.609	0.0429	cytoplasm	cellular component biogenesis; single organism signaling; regulation of vesicle-mediated transport; blood coagulation; regulation of biological quality; hormone transport; leukocyte activation; brain development; negative regulation of regulated secretory pathway; single-organism process; regulation of secretion; protein transport; establishment of localization; response to wounding; hormone secr…	basolateral plasma membrane; membrane; extracellular region part; apical plasma membrane; cytoplasmic vesicle; cell periphery; cytoplasm; vesicle; intracellular part; cell; extracellular exosome; plasma membrane region; intracellular; cell part; membrane part; secretory vesicle; extracellular vesicle; secretory granule; membrane-bounded organelle; apical part of cell; intracellular organelle; int…	syntaxin-1 binding; SNARE binding; protein binding; syntaxin binding; binding;	K15301			IPR027482;	Sec1-like, domain 2;
O00192	642	T	Armadillo repeat protein deleted in velo-cardio-facial syndrome	ARVCF	1	0.000543	101.53	NFDT(1)LDLPK	3	-0.19939	4	1.079	0.738	nucleus	developmental process; single-multicellular organism process; biological adhesion; single organismal cell-cell adhesion; calcium-dependent cell-cell adhesion via plasma membrane cell adhesion molecules; single-organism developmental process; cell-cell adhesion; single organism cell adhesion; single-organism process; cell adhesion; multicellular organism development; cell-cell adhesion via plasma-…	membrane; organelle; intracellular membrane-bounded organelle; intracellular organelle; nucleus; cell periphery; cell part; intracellular; cytoplasm; intracellular part; membrane-bounded organelle; cell; plasma membrane;	protein binding; binding;				IPR011989; IPR016024;	Armadillo-like helical; Armadillo-type fold;
O00192	335	S	Armadillo repeat protein deleted in velo-cardio-facial syndrome	ARVCF	0.985652	0.0253	57.174	GS(0.014)MGS(0.986)LDR	2	0.85894	1	1.410	0.0455	nucleus	developmental process; single-multicellular organism process; biological adhesion; single organismal cell-cell adhesion; calcium-dependent cell-cell adhesion via plasma membrane cell adhesion molecules; single-organism developmental process; cell-cell adhesion; single organism cell adhesion; single-organism process; cell adhesion; multicellular organism development; cell-cell adhesion via plasma-…	membrane; organelle; intracellular membrane-bounded organelle; intracellular organelle; nucleus; cell periphery; cell part; intracellular; cytoplasm; intracellular part; membrane-bounded organelle; cell; plasma membrane;	protein binding; binding;				IPR011989; IPR016024;	Armadillo-like helical; Armadillo-type fold;
O00192	606	S	Armadillo repeat protein deleted in velo-cardio-facial syndrome	ARVCF	0.96565	5.78e-05	69.071	YQEAEPGPLGS(0.034)AVGS(0.966)QR	3	-0.23846	2	1.650	0.258	nucleus	developmental process; single-multicellular organism process; biological adhesion; single organismal cell-cell adhesion; calcium-dependent cell-cell adhesion via plasma membrane cell adhesion molecules; single-organism developmental process; cell-cell adhesion; single organism cell adhesion; single-organism process; cell adhesion; multicellular organism development; cell-cell adhesion via plasma-…	membrane; organelle; intracellular membrane-bounded organelle; intracellular organelle; nucleus; cell periphery; cell part; intracellular; cytoplasm; intracellular part; membrane-bounded organelle; cell; plasma membrane;	protein binding; binding;				IPR011989; IPR016024;	Armadillo-like helical; Armadillo-type fold;
O00192	343	S	Armadillo repeat protein deleted in velo-cardio-facial syndrome	ARVCF	0.999854	0.00304	65.348	RS(1)PSVDSAR	3	0.72641	2	1.675	0.0267	nucleus	developmental process; single-multicellular organism process; biological adhesion; single organismal cell-cell adhesion; calcium-dependent cell-cell adhesion via plasma membrane cell adhesion molecules; single-organism developmental process; cell-cell adhesion; single organism cell adhesion; single-organism process; cell adhesion; multicellular organism development; cell-cell adhesion via plasma-…	membrane; organelle; intracellular membrane-bounded organelle; intracellular organelle; nucleus; cell periphery; cell part; intracellular; cytoplasm; intracellular part; membrane-bounded organelle; cell; plasma membrane;	protein binding; binding;				IPR011989; IPR016024;	Armadillo-like helical; Armadillo-type fold;
O00193	17	S	Small acidic protein	SMAP	0.862507	5.53e-51	186.13	S(0.137)AS(0.863)PDDDLGSSNWEAADLGNEER	3	-0.14626	6	0.595	0.0922	nucleus							IPR028124;	Small acidic protein-like domain;
O00203	276	S	AP-3 complex subunit beta-1	AP3B1	1	4.62e-08	133.47	NFYES(1)DDDQKEK	3	0.030727	6	0.850	0.442	cytoplasm	regulation of T cell activation; regulation of leukocyte activation; blood coagulation; regulation of biological quality; establishment of protein localization to organelle; single-organism process; protein targeting to vacuole; regulation of lymphocyte activation; positive regulation of alpha-beta T cell activation; protein transport; establishment of localization; protein targeting; response to…	membrane; AP-type membrane coat adaptor complex; organelle membrane; cytoplasmic vesicle; membrane protein complex; cytoplasmic region; cytoplasm; vesicle; cell projection cytoplasm; cytoplasmic vesicle part; macromolecular complex; intracellular part; cell; AP-3 adaptor complex; organelle part; coated vesicle membrane; lysosomal membrane; clathrin-coated vesicle; membrane part; intracellular; ce…	protein binding; phosphatase binding; protein phosphatase binding; GTP-dependent protein binding; enzyme binding; binding;	K12397	AP3B; AP-3 complex subunit beta	hsa04142 Lysosome - Homo sapiens (human);	IPR015151; IPR011989; IPR029394; IPR016024; IPR029390; IPR002553;	Beta-adaptin appendage, C-terminal subdomain; Armadillo-like helical; AP-3 complex subunit beta 1, serine-rich domain; Armadillo-type fold; AP-3 complex subunit beta, C-terminal domain; Clathrin/coatomer adaptor, adaptin-like, N-terminal;
O00231	14	S	26S proteasome non-ATPase regulatory subunit 11	PSMD11	0.856318	0.00117	103.97	AQS(0.856)LLS(0.139)T(0.005)DR	2	-0.64329	2	0.636	0.0966	cytoplasm	single organism signaling; cellular component biogenesis; posttranscriptional regulation of gene expression; positive regulation of ubiquitin-protein transferase activity; regulation of defense response; regulation of cell cycle process; cellular metabolic process; positive regulation of cellular protein catabolic process; metabolic process; macromolecular complex assembly; positive regulation of…	membrane; secretory granule lumen; extracellular region part; cytoplasmic vesicle; proteasome regulatory particle; vesicle; cytoplasm; cytoplasmic vesicle part; macromolecular complex; intracellular part; cell; ficolin-1-rich granule lumen; organelle part; endopeptidase complex; extracellular exosome; ficolin-1-rich granule; membrane-enclosed lumen; nucleoplasm; catalytic complex; vesicle lumen; …	protein binding; structural molecule activity; binding;	K03036	PSMD11; 26S proteasome regulatory subunit N6	hsa03050 Proteasome - Homo sapiens (human); hsa05169 Epstein-Barr virus infection - Homo sapiens (human);	IPR000717; IPR011991; IPR011990;	Proteasome component (PCI) domain; Winged helix-turn-helix DNA-binding domain; Tetratricopeptide-like helical domain;
O00257	415	S	E3 SUMO-protein ligase CBX4	CBX4	0.986259	0.000286	72.797	CLS(0.986)ET(0.014)HGEREPCK	3	-0.92822	1			nucleus	regulation of cell death; nucleic acid-templated transcription; biosynthetic process; negative regulation of RNA metabolic process; cellular metabolic process; regulation of RNA biosynthetic process; metabolic process; negative regulation of macromolecule biosynthetic process; protein metabolic process; macromolecule metabolic process; negative regulation of nucleic acid-templated transcription; …	intracellular organelle; intracellular organelle part; macromolecular complex; nuclear lumen; intracellular part; transferase complex; nuclear body; cell; organelle part; nuclear ubiquitin ligase complex; membrane-enclosed lumen; organelle; intracellular membrane-bounded organelle; catalytic complex; nucleus; nucleoplasm; intracellular organelle lumen; nuclear speck; cell part; intracellular; PRC…	histone binding; DNA binding; RNA binding; transcription corepressor activity; ubiquitin-like protein transferase activity; methylated histone binding; ligase activity; protein binding; chromatin binding; transcription cofactor activity; SUMO binding; ubiquitin-like protein binding; single-stranded RNA binding; SUMO transferase activity; phosphoprotein binding; regulatory region DNA binding; orga…	K11452			IPR017984; IPR023780; IPR016197; IPR000953;	Chromo domain subgroup; Chromo domain; Chromo domain-like; Chromo/chromo shadow domain;
O00264	74	T	Membrane-associated progesterone receptor component 1	PGRMC1	1	6.17e-06	153.7	RDFT(1)PAELRR	3	-0.44943	5	0.751	0.603	nucleus	leukocyte activation; neutrophil activation involved in immune response; immune effector process; single-organism process; response to stimulus; establishment of localization; single-organism localization; myeloid cell activation involved in immune response; granulocyte activation; cellular process; secretion; single-organism transport; myeloid leukocyte activation; leukocyte mediated immunity; v…	membrane; nuclear outer membrane-endoplasmic reticulum membrane network; endoplasmic reticulum; extracellular region part; cytoplasmic vesicle; organelle membrane; cell periphery; cytoplasm; vesicle; cytoplasmic vesicle part; intrinsic component of membrane; intracellular part; cell; organelle part; extracellular exosome; membrane part; intracellular; cell part; whole membrane; secretory vesicle;…	organic cyclic compound binding; heterocyclic compound binding; heme binding; binding; lipid binding; protein binding; tetrapyrrole binding; steroid binding;	K17278			IPR001199;	Cytochrome b5-like heme/steroid binding domain;
O00264	181	S	Membrane-associated progesterone receptor component 1	PGRMC1	0.999994	1.08e-74	237.45	LLKEGEEPTVYS(1)DEEEPKDESAR	3	-0.0084695	60	0.904	0.699	nucleus	leukocyte activation; neutrophil activation involved in immune response; immune effector process; single-organism process; response to stimulus; establishment of localization; single-organism localization; myeloid cell activation involved in immune response; granulocyte activation; cellular process; secretion; single-organism transport; myeloid leukocyte activation; leukocyte mediated immunity; v…	membrane; nuclear outer membrane-endoplasmic reticulum membrane network; endoplasmic reticulum; extracellular region part; cytoplasmic vesicle; organelle membrane; cell periphery; cytoplasm; vesicle; cytoplasmic vesicle part; intrinsic component of membrane; intracellular part; cell; organelle part; extracellular exosome; membrane part; intracellular; cell part; whole membrane; secretory vesicle;…	organic cyclic compound binding; heterocyclic compound binding; heme binding; binding; lipid binding; protein binding; tetrapyrrole binding; steroid binding;	K17278			IPR001199;	Cytochrome b5-like heme/steroid binding domain;
O00264	57	S	Membrane-associated progesterone receptor component 1	PGRMC1	0.999998	1.62e-51	199.94	GDQPAASGDS(1)DDDEPPPLPR	3	-0.059389	92	0.979	0.805	nucleus	leukocyte activation; neutrophil activation involved in immune response; immune effector process; single-organism process; response to stimulus; establishment of localization; single-organism localization; myeloid cell activation involved in immune response; granulocyte activation; cellular process; secretion; single-organism transport; myeloid leukocyte activation; leukocyte mediated immunity; v…	membrane; nuclear outer membrane-endoplasmic reticulum membrane network; endoplasmic reticulum; extracellular region part; cytoplasmic vesicle; organelle membrane; cell periphery; cytoplasm; vesicle; cytoplasmic vesicle part; intrinsic component of membrane; intracellular part; cell; organelle part; extracellular exosome; membrane part; intracellular; cell part; whole membrane; secretory vesicle;…	organic cyclic compound binding; heterocyclic compound binding; heme binding; binding; lipid binding; protein binding; tetrapyrrole binding; steroid binding;	K17278			IPR001199;	Cytochrome b5-like heme/steroid binding domain;
O00267	666	S	Transcription elongation factor SPT5	SUPT5H	0.99976	0.000118	60.347	DVTNFTVGGFAPMS(1)PR	2	0.1475	2	0.825	0.51	nucleus	viral genome replication; nucleic acid-templated transcription; positive regulation of biosynthetic process; negative regulation of mRNA processing; DNA-templated transcription, elongation; cellular metabolic process; metabolic process; multi-organism metabolic process; regulation of mRNA 3'-end processing; regulation of DNA-templated transcription, elongation; negative regulation of macromolecul…	intracellular organelle; intracellular organelle part; nuclear lumen; macromolecular complex; intracellular part; cell; organelle part; membrane-enclosed lumen; intracellular membrane-bounded organelle; DSIF complex; organelle; nucleoplasm; nucleus; intracellular organelle lumen; cell part; intracellular; transcription elongation factor complex; membrane-bounded organelle; protein complex; nucleo…	organic cyclic compound binding; heterocyclic compound binding; RNA binding; protein heterodimerization activity; binding; protein dimerization activity; nucleic acid binding; protein binding; chromatin binding; enzyme binding;	K15172			IPR008991; IPR006645; IPR024945; IPR014722; IPR005824; IPR005100; IPR022581;	Translation protein SH3-like domain; NusG, N-terminal; Spt5 C-terminal domain; Ribosomal protein L2 domain 2; KOW; Transcription elongation factor Spt5, NGN domain; Spt5 transcription elongation factor, N-terminal;
O00267	671	S	Transcription elongation factor SPT5	SUPT5H	0.796097	0.000874	57.62	IS(0.204)S(0.796)PMHPSAGGQR	3	-0.14841	2	0.756	0.0622	nucleus	viral genome replication; nucleic acid-templated transcription; positive regulation of biosynthetic process; negative regulation of mRNA processing; DNA-templated transcription, elongation; cellular metabolic process; metabolic process; multi-organism metabolic process; regulation of mRNA 3'-end processing; regulation of DNA-templated transcription, elongation; negative regulation of macromolecul…	intracellular organelle; intracellular organelle part; nuclear lumen; macromolecular complex; intracellular part; cell; organelle part; membrane-enclosed lumen; intracellular membrane-bounded organelle; DSIF complex; organelle; nucleoplasm; nucleus; intracellular organelle lumen; cell part; intracellular; transcription elongation factor complex; membrane-bounded organelle; protein complex; nucleo…	organic cyclic compound binding; heterocyclic compound binding; RNA binding; protein heterodimerization activity; binding; protein dimerization activity; nucleic acid binding; protein binding; chromatin binding; enzyme binding;	K15172			IPR008991; IPR006645; IPR024945; IPR014722; IPR005824; IPR005100; IPR022581;	Translation protein SH3-like domain; NusG, N-terminal; Spt5 C-terminal domain; Ribosomal protein L2 domain 2; KOW; Transcription elongation factor Spt5, NGN domain; Spt5 transcription elongation factor, N-terminal;
O00273	315	S	DNA fragmentation factor subunit alpha	DFFA	1	0.00116	63.185	AS(1)PPGDLQNPK	3	-3.3666	1			nucleus	regulation of cell death; DNA catabolic process; negative regulation of cellular component organization; single-organism process; cellular metabolic process; metabolic process; apoptotic nuclear changes; apoptotic process; organic cyclic compound catabolic process; negative regulation of apoptotic DNA fragmentation; macromolecule metabolic process; regulation of primary metabolic process; regulat…	membrane; intracellular organelle; intracellular non-membrane-bounded organelle; cell periphery; cytoplasm; intracellular organelle part; nuclear lumen; intracellular part; cytosol; cell; organelle part; plasma membrane; chromosomal part; non-membrane-bounded organelle; organelle; intracellular membrane-bounded organelle; membrane-enclosed lumen; nucleoplasm; nucleus; intracellular organelle lume…	protein binding; binding;	K02310	DFFA; DNA fragmentation factor, 45 kD, alpha subunit	hsa04210 Apoptosis - Homo sapiens (human);	IPR027296; IPR015121; IPR003508;	DNA fragmentation factor 45kDa C-terminal domain; DNA fragmentation factor 45kDa, middle domain; CIDE-N domain;
O00303	258	S	Eukaryotic translation initiation factor 3 subunit F	EIF3F	0.998258	0.00324	82.645	T(0.002)CFS(0.998)PNR	2	0.75485	1	1.565	0.014	mitochondria	protein modification by small protein removal; IRES-dependent viral translational initiation; peptide metabolic process; viral translation; viral life cycle; cellular protein metabolic process; biosynthetic process; multi-organism cellular process; protein deubiquitination; organonitrogen compound biosynthetic process; cellular metabolic process; organic substance metabolic process; metabolic pro…	membrane; cell part; intracellular; cytoplasm; macromolecular complex; eukaryotic translation initiation factor 3 complex, eIF3m; intracellular part; cytosol; protein complex; cell; cytoplasmic part; eukaryotic translation initiation factor 3 complex;	RNA binding; thiol-dependent ubiquitin-specific protease activity; peptidase activity; translation initiation factor activity; ubiquitin-like protein-specific protease activity; protein binding; cysteine-type peptidase activity; hydrolase activity; heterocyclic compound binding; organic cyclic compound binding; translation factor activity, RNA binding; thiol-dependent ubiquitinyl hydrolase activi…	K03249	EIF3F; translation initiation factor 3 subunit F	hsa03013 RNA transport - Homo sapiens (human);	IPR000555; IPR024969;	JAB1/MPN/MOV34 metalloenzyme domain; Rpn11/EIF3F, C-terminal;
O00308	211	S	NEDD4-like E3 ubiquitin-protein ligase WWP2	WWP2	0.999983	8.08e-06	98.58	TTPATGEQS(1)PGAR	3	-0.63421	2			mitochondria	entry into host; regulation of biological quality; nucleic acid-templated transcription; positive regulation of biosynthetic process; protein autoubiquitination; cellular metabolic process; metabolic process; regulation of localization; negative regulation of macromolecule biosynthetic process; protein metabolic process; macromolecule metabolic process; interspecies interaction between organisms;…	intracellular organelle; membrane; extracellular region part; vesicle; cytoplasm; macromolecular complex; intracellular part; transferase complex; cell; extracellular region; intracellular membrane-bounded organelle; organelle; extracellular exosome; catalytic complex; nucleus; intracellular; cell part; extracellular vesicle; ubiquitin ligase complex; membrane-bounded organelle; extracellular org…	ubiquitin-like protein transferase activity; transcriptional activator activity, RNA polymerase II transcription factor binding; protein binding; ubiquitin-like protein ligase activity; ubiquitin protein ligase activity; transcription factor activity, RNA polymerase II transcription factor binding; catalytic activity; binding; RNA polymerase II transcription factor binding; ubiquitin-protein tran…	K05630	WWP2; atrophin-1 interacting protein 2 (WW domain containing E3 ubiquitin protein ligase 2) [EC:2.3.2.26]	hsa04120 Ubiquitin mediated proteolysis - Homo sapiens (human);	IPR001202; IPR000569; IPR000008;	WW domain; HECT domain; C2 domain;
O00337	11	S	Sodium/nucleoside cotransporter 1	SLC28A1	0.998914	1.09e-05	106.93	RRES(0.999)IS(0.001)LTPVAK	3	-0.34432	4			plasma membrane	cellular aromatic compound metabolic process; nucleobase transport; nitrogen compound metabolic process; organic cyclic compound metabolic process; single-organism process; organic substance transport; primary metabolic process; cellular metabolic process; pyrimidine nucleobase transport; nucleoside transport; organic substance metabolic process; establishment of localization; transport; purine n…	membrane; intrinsic component of plasma membrane; plasma membrane part; membrane part; cell part; cell periphery; intrinsic component of membrane; integral component of plasma membrane; cell; integral component of membrane; plasma membrane;	solute:cation symporter activity; active transmembrane transporter activity; secondary active transmembrane transporter activity; purine nucleobase transmembrane transporter activity; carbohydrate derivative transporter activity; ion transmembrane transporter activity; symporter activity; solute:sodium symporter activity; substrate-specific transporter activity; monovalent inorganic cation transm…	K11536			IPR011642; IPR011657; IPR002668;	Nucleoside transporter/FeoB GTPase, Gate domain; Concentrative nucleoside transporter C-terminal domain; Concentrative nucleoside transporter N-terminal domain;
O00337	43	S	Sodium/nucleoside cotransporter 1	SLC28A1	0.942612	0.000407	77.387	S(0.057)DLS(0.943)PAEIR	2	0.45568	1			plasma membrane	cellular aromatic compound metabolic process; nucleobase transport; nitrogen compound metabolic process; organic cyclic compound metabolic process; single-organism process; organic substance transport; primary metabolic process; cellular metabolic process; pyrimidine nucleobase transport; nucleoside transport; organic substance metabolic process; establishment of localization; transport; purine n…	membrane; intrinsic component of plasma membrane; plasma membrane part; membrane part; cell part; cell periphery; intrinsic component of membrane; integral component of plasma membrane; cell; integral component of membrane; plasma membrane;	solute:cation symporter activity; active transmembrane transporter activity; secondary active transmembrane transporter activity; purine nucleobase transmembrane transporter activity; carbohydrate derivative transporter activity; ion transmembrane transporter activity; symporter activity; solute:sodium symporter activity; substrate-specific transporter activity; monovalent inorganic cation transm…	K11536			IPR011642; IPR011657; IPR002668;	Nucleoside transporter/FeoB GTPase, Gate domain; Concentrative nucleoside transporter C-terminal domain; Concentrative nucleoside transporter N-terminal domain;
O00337	15	T	Sodium/nucleoside cotransporter 1	SLC28A1	0.99729	0.000606	98.407	ESIS(0.003)LT(0.997)PVAK	3	0.49549	2			plasma membrane	cellular aromatic compound metabolic process; nucleobase transport; nitrogen compound metabolic process; organic cyclic compound metabolic process; single-organism process; organic substance transport; primary metabolic process; cellular metabolic process; pyrimidine nucleobase transport; nucleoside transport; organic substance metabolic process; establishment of localization; transport; purine n…	membrane; intrinsic component of plasma membrane; plasma membrane part; membrane part; cell part; cell periphery; intrinsic component of membrane; integral component of plasma membrane; cell; integral component of membrane; plasma membrane;	solute:cation symporter activity; active transmembrane transporter activity; secondary active transmembrane transporter activity; purine nucleobase transmembrane transporter activity; carbohydrate derivative transporter activity; ion transmembrane transporter activity; symporter activity; solute:sodium symporter activity; substrate-specific transporter activity; monovalent inorganic cation transm…	K11536			IPR011642; IPR011657; IPR002668;	Nucleoside transporter/FeoB GTPase, Gate domain; Concentrative nucleoside transporter C-terminal domain; Concentrative nucleoside transporter N-terminal domain;
O00418	445	S	Eukaryotic elongation factor 2 kinase	EEF2K	0.985173	9.14e-06	54.934	ESENS(0.002)GDS(0.012)GYPS(0.985)EKRGELDDPEPR	4	0.3048	1			cytoplasm,nucleus	regulation of vesicle-mediated transport; regulation of cell death; regulation of biological quality; peptide metabolic process; positive regulation of synapse assembly; response to organophosphorus; cellular metabolic process; regulation of synapse organization; metabolic process; positive regulation of multicellular organismal process; regulation of localization; response to endogenous stimulus…	cytoplasm; intracellular part; cell; cytosol; asymmetric synapse; synapse; organelle; postsynapse; intracellular; cell part; postsynaptic density; postsynaptic specialization; neuron to neuron synapse; cytoplasmic part; synapse part;	nucleoside phosphate binding; phosphotransferase activity, alcohol group as acceptor; protein binding; protein kinase activity; calmodulin-dependent protein kinase activity; organic cyclic compound binding; heterocyclic compound binding; kinase activity; ribonucleotide binding; catalytic activity; binding; purine ribonucleoside binding; cation binding; anion binding; adenyl ribonucleotide binding…	K08292	EEF2K; elongation factor 2 kinase [EC:2.7.11.20]	hsa04921 Oxytocin signaling pathway - Homo sapiens (human); hsa04152 AMPK signaling pathway - Homo sapiens (human);	IPR011990; IPR004166; IPR011009;	Tetratricopeptide-like helical domain; MHCK/EF2 kinase; Protein kinase-like domain;
O00418	18	S	Eukaryotic elongation factor 2 kinase	EEF2K	1	8.64e-05	113.65	LEGVDGGQS(1)PR	2	0.70624	1			cytoplasm,nucleus	regulation of vesicle-mediated transport; regulation of cell death; regulation of biological quality; peptide metabolic process; positive regulation of synapse assembly; response to organophosphorus; cellular metabolic process; regulation of synapse organization; metabolic process; positive regulation of multicellular organismal process; regulation of localization; response to endogenous stimulus…	cytoplasm; intracellular part; cell; cytosol; asymmetric synapse; synapse; organelle; postsynapse; intracellular; cell part; postsynaptic density; postsynaptic specialization; neuron to neuron synapse; cytoplasmic part; synapse part;	nucleoside phosphate binding; phosphotransferase activity, alcohol group as acceptor; protein binding; protein kinase activity; calmodulin-dependent protein kinase activity; organic cyclic compound binding; heterocyclic compound binding; kinase activity; ribonucleotide binding; catalytic activity; binding; purine ribonucleoside binding; cation binding; anion binding; adenyl ribonucleotide binding…	K08292	EEF2K; elongation factor 2 kinase [EC:2.7.11.20]	hsa04921 Oxytocin signaling pathway - Homo sapiens (human); hsa04152 AMPK signaling pathway - Homo sapiens (human);	IPR011990; IPR004166; IPR011009;	Tetratricopeptide-like helical domain; MHCK/EF2 kinase; Protein kinase-like domain;
O00418	474	S	Eukaryotic elongation factor 2 kinase	EEF2K	0.975136	6.38e-05	83.614	KYESDEDS(0.975)LGS(0.01)S(0.014)GR	3	0.72612	3			cytoplasm,nucleus	regulation of vesicle-mediated transport; regulation of cell death; regulation of biological quality; peptide metabolic process; positive regulation of synapse assembly; response to organophosphorus; cellular metabolic process; regulation of synapse organization; metabolic process; positive regulation of multicellular organismal process; regulation of localization; response to endogenous stimulus…	cytoplasm; intracellular part; cell; cytosol; asymmetric synapse; synapse; organelle; postsynapse; intracellular; cell part; postsynaptic density; postsynaptic specialization; neuron to neuron synapse; cytoplasmic part; synapse part;	nucleoside phosphate binding; phosphotransferase activity, alcohol group as acceptor; protein binding; protein kinase activity; calmodulin-dependent protein kinase activity; organic cyclic compound binding; heterocyclic compound binding; kinase activity; ribonucleotide binding; catalytic activity; binding; purine ribonucleoside binding; cation binding; anion binding; adenyl ribonucleotide binding…	K08292	EEF2K; elongation factor 2 kinase [EC:2.7.11.20]	hsa04921 Oxytocin signaling pathway - Homo sapiens (human); hsa04152 AMPK signaling pathway - Homo sapiens (human);	IPR011990; IPR004166; IPR011009;	Tetratricopeptide-like helical domain; MHCK/EF2 kinase; Protein kinase-like domain;
O00418	500	S	Eukaryotic elongation factor 2 kinase	EEF2K	1	0.000537	86.738	AS(1)AVALEVQR	2	-0.55878	1			cytoplasm,nucleus	regulation of vesicle-mediated transport; regulation of cell death; regulation of biological quality; peptide metabolic process; positive regulation of synapse assembly; response to organophosphorus; cellular metabolic process; regulation of synapse organization; metabolic process; positive regulation of multicellular organismal process; regulation of localization; response to endogenous stimulus…	cytoplasm; intracellular part; cell; cytosol; asymmetric synapse; synapse; organelle; postsynapse; intracellular; cell part; postsynaptic density; postsynaptic specialization; neuron to neuron synapse; cytoplasmic part; synapse part;	nucleoside phosphate binding; phosphotransferase activity, alcohol group as acceptor; protein binding; protein kinase activity; calmodulin-dependent protein kinase activity; organic cyclic compound binding; heterocyclic compound binding; kinase activity; ribonucleotide binding; catalytic activity; binding; purine ribonucleoside binding; cation binding; anion binding; adenyl ribonucleotide binding…	K08292	EEF2K; elongation factor 2 kinase [EC:2.7.11.20]	hsa04921 Oxytocin signaling pathway - Homo sapiens (human); hsa04152 AMPK signaling pathway - Homo sapiens (human);	IPR011990; IPR004166; IPR011009;	Tetratricopeptide-like helical domain; MHCK/EF2 kinase; Protein kinase-like domain;
O00429	529	S	Dynamin-1-like protein	DNM1L	0.956071	0.034	40.475	ELPS(0.044)AVS(0.956)RDK	3	0.042467	1	0.634	0.187	cytoplasm	single organism signaling; cellular component biogenesis; regulation of cell death; cellular component morphogenesis; regulation of protein oligomerization; regulation of mitochondrion organization; response to external stimulus; response to flavonoid; response to hypobaric hypoxia; positive regulation of multicellular organismal process; macromolecular complex assembly; regulation of localizatio…	membrane; outer membrane; cluster of actin-based cell projections; organelle membrane; cytoplasm; cytoplasmic vesicle part; macromolecular complex; supramolecular complex; cell; organelle part; non-membrane-bounded organelle; exocytic vesicle; synaptic vesicle; intracellular; secretory vesicle; membrane region; membrane-bounded organelle; neuron part; endoplasmic reticulum membrane; polymeric cyt…	nucleoside phosphate binding; ubiquitin protein ligase binding; nucleoside-triphosphatase regulator activity; GTPase regulator activity; protein dimerization activity; hydrolase activity, acting on acid anhydrides; hydrolase activity; protein binding; molecular function regulator; Rab GTPase binding; organic cyclic compound binding; heterocyclic compound binding; cytoskeletal protein binding; ide…	K17065	DNM1L; dynamin 1-like protein [EC:3.6.5.5]	hsa04668 TNF signaling pathway - Homo sapiens (human); hsa04621 NOD-like receptor signaling pathway - Homo sapiens (human);	IPR030381; IPR003130; IPR001401; IPR027417; IPR020850; IPR000375;	Dynamin-type guanine nucleotide-binding (G) domain; Dynamin GTPase effector; Dynamin, GTPase domain; P-loop containing nucleoside triphosphate hydrolase; GTPase effector domain; Dynamin central domain;
O00429	616	S	Dynamin-1-like protein	DNM1L	0.999859	0.0498	44.998	SKPIPIMPAS(1)PQK	3	-1.5244	1			cytoplasm	single organism signaling; cellular component biogenesis; regulation of cell death; cellular component morphogenesis; regulation of protein oligomerization; regulation of mitochondrion organization; response to external stimulus; response to flavonoid; response to hypobaric hypoxia; positive regulation of multicellular organismal process; macromolecular complex assembly; regulation of localizatio…	membrane; outer membrane; cluster of actin-based cell projections; organelle membrane; cytoplasm; cytoplasmic vesicle part; macromolecular complex; supramolecular complex; cell; organelle part; non-membrane-bounded organelle; exocytic vesicle; synaptic vesicle; intracellular; secretory vesicle; membrane region; membrane-bounded organelle; neuron part; endoplasmic reticulum membrane; polymeric cyt…	nucleoside phosphate binding; ubiquitin protein ligase binding; nucleoside-triphosphatase regulator activity; GTPase regulator activity; protein dimerization activity; hydrolase activity, acting on acid anhydrides; hydrolase activity; protein binding; molecular function regulator; Rab GTPase binding; organic cyclic compound binding; heterocyclic compound binding; cytoskeletal protein binding; ide…	K17065	DNM1L; dynamin 1-like protein [EC:3.6.5.5]	hsa04668 TNF signaling pathway - Homo sapiens (human); hsa04621 NOD-like receptor signaling pathway - Homo sapiens (human);	IPR030381; IPR003130; IPR001401; IPR027417; IPR020850; IPR000375;	Dynamin-type guanine nucleotide-binding (G) domain; Dynamin GTPase effector; Dynamin, GTPase domain; P-loop containing nucleoside triphosphate hydrolase; GTPase effector domain; Dynamin central domain;
O00443	338	S	Phosphatidylinositol 4-phosphate 3-kinase C2 domain-containing subunit alpha	PIK3C2A	0.960259	0.0219	66.321	S(0.04)QS(0.96)LNIR	2	0.096794	1	0.313	0.00359	cytoplasm	cellular component biogenesis; single organism signaling; muscle system process; regulation of biological quality; insulin receptor signaling pathway; platelet-derived growth factor receptor signaling pathway; glycerolipid metabolic process; cell surface receptor signaling pathway; phosphatidylinositol phosphorylation; phospholipid biosynthetic process; single-organism process; cellular lipid met…	membrane; extracellular region part; transferase complex, transferring phosphorus-containing groups; extrinsic component of membrane; cytoplasmic vesicle; cell periphery; cytoplasm; vesicle; macromolecular complex; intracellular part; cell; extracellular exosome; catalytic complex; clathrin-coated vesicle; membrane part; intracellular; cell part; extracellular vesicle; membrane-bounded organelle;…	nucleoside phosphate binding; phosphotransferase activity, alcohol group as acceptor; protein binding; organic cyclic compound binding; heterocyclic compound binding; kinase activity; catalytic activity; ribonucleotide binding; binding; phosphatidylinositol binding; purine ribonucleoside binding; lipid binding; anion binding; 1-phosphatidylinositol-4-phosphate 3-kinase activity; adenyl ribonucleo…	K00923	PIK3C2; phosphatidylinositol-4-phosphate 3-kinase [EC:2.7.1.154]	hsa00562 Inositol phosphate metabolism - Homo sapiens (human); hsa01100 Metabolic pathways - Homo sapiens (human); hsa04070 Phosphatidylinositol signaling system - Homo sapiens (human);	IPR001263; IPR000403; IPR002420; IPR029071; IPR016024; IPR001683; IPR000341; IPR000008; IPR011009;	Phosphoinositide 3-kinase, accessory (PIK) domain; Phosphatidylinositol 3-/4-kinase, catalytic domain; Phosphatidylinositol 3-kinase, C2 domain; Ubiquitin-related domain; Armadillo-type fold; Phox homologous domain; Phosphatidylinositol 3-kinase Ras-binding (PI3K RBD) domain; C2 domain; Protein kinase-like domain;
O00443	1553	S	Phosphatidylinositol 4-phosphate 3-kinase C2 domain-containing subunit alpha	PIK3C2A	0.910183	1.29e-06	72.585	S(0.001)ADAGS(0.046)FS(0.91)PT(0.043)PGQIGGAVK	3	0.16766	1			cytoplasm	cellular component biogenesis; single organism signaling; muscle system process; regulation of biological quality; insulin receptor signaling pathway; platelet-derived growth factor receptor signaling pathway; glycerolipid metabolic process; cell surface receptor signaling pathway; phosphatidylinositol phosphorylation; phospholipid biosynthetic process; single-organism process; cellular lipid met…	membrane; extracellular region part; transferase complex, transferring phosphorus-containing groups; extrinsic component of membrane; cytoplasmic vesicle; cell periphery; cytoplasm; vesicle; macromolecular complex; intracellular part; cell; extracellular exosome; catalytic complex; clathrin-coated vesicle; membrane part; intracellular; cell part; extracellular vesicle; membrane-bounded organelle;…	nucleoside phosphate binding; phosphotransferase activity, alcohol group as acceptor; protein binding; organic cyclic compound binding; heterocyclic compound binding; kinase activity; catalytic activity; ribonucleotide binding; binding; phosphatidylinositol binding; purine ribonucleoside binding; lipid binding; anion binding; 1-phosphatidylinositol-4-phosphate 3-kinase activity; adenyl ribonucleo…	K00923	PIK3C2; phosphatidylinositol-4-phosphate 3-kinase [EC:2.7.1.154]	hsa00562 Inositol phosphate metabolism - Homo sapiens (human); hsa01100 Metabolic pathways - Homo sapiens (human); hsa04070 Phosphatidylinositol signaling system - Homo sapiens (human);	IPR001263; IPR000403; IPR002420; IPR029071; IPR016024; IPR001683; IPR000341; IPR000008; IPR011009;	Phosphoinositide 3-kinase, accessory (PIK) domain; Phosphatidylinositol 3-/4-kinase, catalytic domain; Phosphatidylinositol 3-kinase, C2 domain; Ubiquitin-related domain; Armadillo-type fold; Phox homologous domain; Phosphatidylinositol 3-kinase Ras-binding (PI3K RBD) domain; C2 domain; Protein kinase-like domain;
O00499	296	S	Myc box-dependent-interacting protein 1	BIN1	0.999465	8.62e-33	189.84	GNKS(0.999)PS(1)PPDGS(0.001)PAATPEIR	3	-1.1511	15	1.011	0.913	cytoplasm	cellular component biogenesis; regulation of vesicle-mediated transport; regulation of cell death; regulation of gliogenesis; cellular developmental process; nucleus localization; neurogenesis; single-organism process; multi-organism cellular process; regulation of cell cycle process; regulation of astrocyte differentiation; establishment of localization; positive regulation of glial cell differe…	membrane; cell periphery; myofibril; cytoplasm; macromolecular complex; supramolecular fiber; intracellular part; Z disc; supramolecular complex; cell; I band; organelle part; non-membrane-bounded organelle; cytoskeleton; T-tubule; protein-lipid complex; main axon; membrane part; intracellular; cell part; contractile fiber; neuron projection; membrane-bounded organelle; neuron part; intracellular…	actin filament binding; identical protein binding; cytoskeletal protein binding; binding; tau protein binding; macromolecular complex binding; actin binding; protein binding; RNA polymerase binding; enzyme binding; protein complex binding;	K12562	AMPH; amphiphysin	hsa04666 Fc gamma R-mediated phagocytosis - Homo sapiens (human); hsa04144 Endocytosis - Homo sapiens (human);	IPR001452; IPR027267; IPR004148;	SH3 domain; Arfaptin homology (AH) domain/BAR domain; BAR domain;
O00499	298	S	Myc box-dependent-interacting protein 1	BIN1	0.999574	7.13e-31	162.01	GNKS(0.999)PS(1)PPDGS(0.001)PAATPEIR	3	-1.1511	22	1.047	0.793	cytoplasm	cellular component biogenesis; regulation of vesicle-mediated transport; regulation of cell death; regulation of gliogenesis; cellular developmental process; nucleus localization; neurogenesis; single-organism process; multi-organism cellular process; regulation of cell cycle process; regulation of astrocyte differentiation; establishment of localization; positive regulation of glial cell differe…	membrane; cell periphery; myofibril; cytoplasm; macromolecular complex; supramolecular fiber; intracellular part; Z disc; supramolecular complex; cell; I band; organelle part; non-membrane-bounded organelle; cytoskeleton; T-tubule; protein-lipid complex; main axon; membrane part; intracellular; cell part; contractile fiber; neuron projection; membrane-bounded organelle; neuron part; intracellular…	actin filament binding; identical protein binding; cytoskeletal protein binding; binding; tau protein binding; macromolecular complex binding; actin binding; protein binding; RNA polymerase binding; enzyme binding; protein complex binding;	K12562	AMPH; amphiphysin	hsa04666 Fc gamma R-mediated phagocytosis - Homo sapiens (human); hsa04144 Endocytosis - Homo sapiens (human);	IPR001452; IPR027267; IPR004148;	SH3 domain; Arfaptin homology (AH) domain/BAR domain; BAR domain;
O00499	303	S	Myc box-dependent-interacting protein 1	BIN1	0.999999	6.03e-26	175.8	SPSPPDGS(1)PAATPEIR	3	-0.60329	11	1.041	0.834	cytoplasm	cellular component biogenesis; regulation of vesicle-mediated transport; regulation of cell death; regulation of gliogenesis; cellular developmental process; nucleus localization; neurogenesis; single-organism process; multi-organism cellular process; regulation of cell cycle process; regulation of astrocyte differentiation; establishment of localization; positive regulation of glial cell differe…	membrane; cell periphery; myofibril; cytoplasm; macromolecular complex; supramolecular fiber; intracellular part; Z disc; supramolecular complex; cell; I band; organelle part; non-membrane-bounded organelle; cytoskeleton; T-tubule; protein-lipid complex; main axon; membrane part; intracellular; cell part; contractile fiber; neuron projection; membrane-bounded organelle; neuron part; intracellular…	actin filament binding; identical protein binding; cytoskeletal protein binding; binding; tau protein binding; macromolecular complex binding; actin binding; protein binding; RNA polymerase binding; enzyme binding; protein complex binding;	K12562	AMPH; amphiphysin	hsa04666 Fc gamma R-mediated phagocytosis - Homo sapiens (human); hsa04144 Endocytosis - Homo sapiens (human);	IPR001452; IPR027267; IPR004148;	SH3 domain; Arfaptin homology (AH) domain/BAR domain; BAR domain;
O00499	331	S	Myc box-dependent-interacting protein 1	BIN1	0.751365	1.79e-39	161.55	VNHEPEPAGGATPGAT(0.025)LPKS(0.751)PS(0.223)QLR	4	-0.23348	3	1.944	0.321	cytoplasm	cellular component biogenesis; regulation of vesicle-mediated transport; regulation of cell death; regulation of gliogenesis; cellular developmental process; nucleus localization; neurogenesis; single-organism process; multi-organism cellular process; regulation of cell cycle process; regulation of astrocyte differentiation; establishment of localization; positive regulation of glial cell differe…	membrane; cell periphery; myofibril; cytoplasm; macromolecular complex; supramolecular fiber; intracellular part; Z disc; supramolecular complex; cell; I band; organelle part; non-membrane-bounded organelle; cytoskeleton; T-tubule; protein-lipid complex; main axon; membrane part; intracellular; cell part; contractile fiber; neuron projection; membrane-bounded organelle; neuron part; intracellular…	actin filament binding; identical protein binding; cytoskeletal protein binding; binding; tau protein binding; macromolecular complex binding; actin binding; protein binding; RNA polymerase binding; enzyme binding; protein complex binding;	K12562	AMPH; amphiphysin	hsa04666 Fc gamma R-mediated phagocytosis - Homo sapiens (human); hsa04144 Endocytosis - Homo sapiens (human);	IPR001452; IPR027267; IPR004148;	SH3 domain; Arfaptin homology (AH) domain/BAR domain; BAR domain;
O00505	60	S	Importin subunit alpha-4	KPNA3	1	3.02e-12	121.46	NVPQEES(1)LEDS(1)DVDADFK	3	-0.89792	11	0.802	0.00354	cytoplasm	entry into host; cellular component biogenesis; regulation of biological quality; NLS-bearing protein import into nucleus; multi-organism nuclear import; establishment of protein localization to organelle; protein import; single-organism process; multi-organism cellular localization; nuclear transport; multi-organism cellular process; modification of morphology or physiology of other organism; pr…	intracellular organelle; nuclear pore; nuclear envelope; cytoplasm; intracellular organelle part; organelle envelope; nuclear lumen; endomembrane system; macromolecular complex; intracellular part; cytosol; cell; organelle part; membrane-enclosed lumen; organelle; intracellular membrane-bounded organelle; nucleoplasm; nucleus; intracellular organelle lumen; cell part; intracellular; envelope; mem…	signal sequence binding; protein transporter activity; peptide binding; binding; nuclear localization sequence binding; substrate-specific transporter activity; protein C-terminus binding; protein binding; amide binding; transporter activity;				IPR002652; IPR011989; IPR016024;	Importin-alpha, importin-beta-binding domain; Armadillo-like helical; Armadillo-type fold;
O00505	56	S	Importin subunit alpha-4	KPNA3	1	7.89e-06	85.013	NVPQEES(1)LEDS(1)DVDADFK	3	-0.89792	2	0.492	0.0128	cytoplasm	entry into host; cellular component biogenesis; regulation of biological quality; NLS-bearing protein import into nucleus; multi-organism nuclear import; establishment of protein localization to organelle; protein import; single-organism process; multi-organism cellular localization; nuclear transport; multi-organism cellular process; modification of morphology or physiology of other organism; pr…	intracellular organelle; nuclear pore; nuclear envelope; cytoplasm; intracellular organelle part; organelle envelope; nuclear lumen; endomembrane system; macromolecular complex; intracellular part; cytosol; cell; organelle part; membrane-enclosed lumen; organelle; intracellular membrane-bounded organelle; nucleoplasm; nucleus; intracellular organelle lumen; cell part; intracellular; envelope; mem…	signal sequence binding; protein transporter activity; peptide binding; binding; nuclear localization sequence binding; substrate-specific transporter activity; protein C-terminus binding; protein binding; amide binding; transporter activity;				IPR002652; IPR011989; IPR016024;	Importin-alpha, importin-beta-binding domain; Armadillo-like helical; Armadillo-type fold;
O00506	231	S	Serine/threonine-protein kinase 25	STK25	0.998721	0.000148	69.361	NS(0.999)PPT(0.001)LEGQHSKPFK	4	1.1665	1			cytoplasm	cellular component biogenesis; single organism signaling; regulation of stress-activated MAPK cascade; positive regulation of cellular protein metabolic process; cellular metabolic process; metabolic process; positive regulation of multicellular organismal process; organelle inheritance; positive regulation of phosphorylation; positive regulation of phosphorus metabolic process; macromolecule met…	intracellular organelle; membrane; extracellular region part; bounding membrane of organelle; organelle membrane; vesicle; intracellular organelle part; cytoplasm; Golgi membrane; endomembrane system; intracellular part; cell; extracellular region; organelle part; extracellular exosome; organelle; intracellular membrane-bounded organelle; intracellular; cell part; extracellular vesicle; Golgi app…	nucleoside phosphate binding; phosphotransferase activity, alcohol group as acceptor; protein dimerization activity; protein binding; protein kinase activity; signal transducer, downstream of receptor, with serine/threonine kinase activity; signal transducer activity; organic cyclic compound binding; heterocyclic compound binding; identical protein binding; kinase activity; catalytic activity; ri…	K08838			IPR000719; IPR011009;	Protein kinase domain; Protein kinase-like domain;
O00512	687	S	B-cell CLL/lymphoma 9 protein	BCL9	0.978493	0.000597	78.615	IPVEGPLS(0.978)PS(0.022)R	2	0.1932	2			nucleus	single organism signaling; cellular component biogenesis; myotube differentiation; cell surface receptor signaling pathway; cellular developmental process; positive regulation of biosynthetic process; single-organism process; response to wounding; regulation of RNA biosynthetic process; signal transduction; cell communication; positive regulation of metabolic process; cellular component assembly;…	intracellular organelle; cytoplasm; cis-Golgi network; intracellular organelle part; endomembrane system; nuclear lumen; intracellular part; cell; organelle part; organelle; intracellular membrane-bounded organelle; membrane-enclosed lumen; nucleoplasm; nucleus; intracellular organelle lumen; cell part; intracellular; Golgi apparatus; membrane-bounded organelle; cytoplasmic part; organelle lumen;…	protein binding; binding; beta-catenin binding;				IPR024670;	B-cell lymphoma 9, beta-catenin binding domain;
O00512	278	S	B-cell CLL/lymphoma 9 protein	BCL9	1	6.04e-13	125.04	PAAPPRPLDRES(1)PGVENK	3	0.11008	4			nucleus	single organism signaling; cellular component biogenesis; myotube differentiation; cell surface receptor signaling pathway; cellular developmental process; positive regulation of biosynthetic process; single-organism process; response to wounding; regulation of RNA biosynthetic process; signal transduction; cell communication; positive regulation of metabolic process; cellular component assembly;…	intracellular organelle; cytoplasm; cis-Golgi network; intracellular organelle part; endomembrane system; nuclear lumen; intracellular part; cell; organelle part; organelle; intracellular membrane-bounded organelle; membrane-enclosed lumen; nucleoplasm; nucleus; intracellular organelle lumen; cell part; intracellular; Golgi apparatus; membrane-bounded organelle; cytoplasmic part; organelle lumen;…	protein binding; binding; beta-catenin binding;				IPR024670;	B-cell lymphoma 9, beta-catenin binding domain;
O00515	365	S	Ladinin-1	LAD1	0.98761	0.00177	78.61	TYS(0.001)S(0.011)S(0.988)LKR	3	0.087372	2	0.516	0.337	nucleus		extracellular matrix; extracellular exosome; organelle; extracellular region part; vesicle; extracellular vesicle; proteinaceous extracellular matrix; membrane-bounded organelle; extracellular matrix component; extracellular region; extracellular organelle; basement membrane;	cell adhesion molecule binding; protein binding; structural molecule activity; binding; cadherin binding;
O00515	356	S	Ladinin-1	LAD1	0.943232	7.66e-11	119.66	IPSKEEEADMS(0.052)S(0.943)PT(0.005)QR	3	-0.47829	5	0.528	0.0772	nucleus		extracellular matrix; extracellular exosome; organelle; extracellular region part; vesicle; extracellular vesicle; proteinaceous extracellular matrix; membrane-bounded organelle; extracellular matrix component; extracellular region; extracellular organelle; basement membrane;	cell adhesion molecule binding; protein binding; structural molecule activity; binding; cadherin binding;
O00515	177	S	Ladinin-1	LAD1	1	6.14e-05	98.676	GVPEKS(1)PVLEK	2	1.1451	10	1.767	0.228	nucleus		extracellular matrix; extracellular exosome; organelle; extracellular region part; vesicle; extracellular vesicle; proteinaceous extracellular matrix; membrane-bounded organelle; extracellular matrix component; extracellular region; extracellular organelle; basement membrane;	cell adhesion molecule binding; protein binding; structural molecule activity; binding; cadherin binding;
O00515	394	S	Ladinin-1	LAD1	0.984244	1.16e-06	114.01	S(0.01)AS(0.984)MKLPDNT(0.006)VK	3	0.018013	4	0.557	0.299	nucleus		extracellular matrix; extracellular exosome; organelle; extracellular region part; vesicle; extracellular vesicle; proteinaceous extracellular matrix; membrane-bounded organelle; extracellular matrix component; extracellular region; extracellular organelle; basement membrane;	cell adhesion molecule binding; protein binding; structural molecule activity; binding; cadherin binding;
O00567	563	S	Nucleolar protein 56	NOP56	0.876419	4.12e-12	118.36	KFS(0.876)KEEPVS(0.062)S(0.062)GPEEAVGK	3	-0.20558	2	0.406	0.113	nucleus	rRNA metabolic process; RNA processing; ncRNA processing; cellular component biogenesis; ribonucleoprotein complex biogenesis; cellular aromatic compound metabolic process; rRNA modification; nitrogen compound metabolic process; ribosome biogenesis; organic cyclic compound metabolic process; primary metabolic process; cellular metabolic process; RNA modification; organic substance metabolic proce…	membrane; cytoplasm; macromolecular complex; intracellular part; cell; organelle part; preribosome; non-membrane-bounded organelle; membrane-enclosed lumen; nucleoplasm; intracellular organelle lumen; intracellular; cell part; small-subunit processome; membrane-bounded organelle; organelle lumen; intracellular organelle; intracellular non-membrane-bounded organelle; intracellular organelle part; …	snoRNA binding; organic cyclic compound binding; heterocyclic compound binding; cell adhesion molecule binding; RNA binding; binding; cadherin binding; nucleic acid binding; histone methyltransferase binding; protein binding; enzyme binding;	K14564	NOP56; nucleolar protein 56	hsa03008 Ribosome biogenesis in eukaryotes - Homo sapiens (human);	IPR002687; IPR012974; IPR012976;	Nop domain; NOP5, N-terminal; NOSIC;
O00567	570	S	Nucleolar protein 56	NOP56	1	6.59e-18	139.69	EEPVS(1)S(1)GPEEAVGK	3	1.0394	3	0.559	0.0683	nucleus	rRNA metabolic process; RNA processing; ncRNA processing; cellular component biogenesis; ribonucleoprotein complex biogenesis; cellular aromatic compound metabolic process; rRNA modification; nitrogen compound metabolic process; ribosome biogenesis; organic cyclic compound metabolic process; primary metabolic process; cellular metabolic process; RNA modification; organic substance metabolic proce…	membrane; cytoplasm; macromolecular complex; intracellular part; cell; organelle part; preribosome; non-membrane-bounded organelle; membrane-enclosed lumen; nucleoplasm; intracellular organelle lumen; intracellular; cell part; small-subunit processome; membrane-bounded organelle; organelle lumen; intracellular organelle; intracellular non-membrane-bounded organelle; intracellular organelle part; …	snoRNA binding; organic cyclic compound binding; heterocyclic compound binding; cell adhesion molecule binding; RNA binding; binding; cadherin binding; nucleic acid binding; histone methyltransferase binding; protein binding; enzyme binding;	K14564	NOP56; nucleolar protein 56	hsa03008 Ribosome biogenesis in eukaryotes - Homo sapiens (human);	IPR002687; IPR012974; IPR012976;	Nop domain; NOP5, N-terminal; NOSIC;
O00567	569	S	Nucleolar protein 56	NOP56	1	0.000383	62.94	EEPVS(1)S(1)GPEEAVGK	3	1.0394	2	0.601	0.0229	nucleus	rRNA metabolic process; RNA processing; ncRNA processing; cellular component biogenesis; ribonucleoprotein complex biogenesis; cellular aromatic compound metabolic process; rRNA modification; nitrogen compound metabolic process; ribosome biogenesis; organic cyclic compound metabolic process; primary metabolic process; cellular metabolic process; RNA modification; organic substance metabolic proce…	membrane; cytoplasm; macromolecular complex; intracellular part; cell; organelle part; preribosome; non-membrane-bounded organelle; membrane-enclosed lumen; nucleoplasm; intracellular organelle lumen; intracellular; cell part; small-subunit processome; membrane-bounded organelle; organelle lumen; intracellular organelle; intracellular non-membrane-bounded organelle; intracellular organelle part; …	snoRNA binding; organic cyclic compound binding; heterocyclic compound binding; cell adhesion molecule binding; RNA binding; binding; cadherin binding; nucleic acid binding; histone methyltransferase binding; protein binding; enzyme binding;	K14564	NOP56; nucleolar protein 56	hsa03008 Ribosome biogenesis in eukaryotes - Homo sapiens (human);	IPR002687; IPR012974; IPR012976;	Nop domain; NOP5, N-terminal; NOSIC;
O00567	520	S	Nucleolar protein 56	NOP56	0.885943	2.49e-18	135.91	EELMS(0.114)S(0.886)DLEETAGSTSIPK	3	0.031167	10	0.788	0.24	nucleus	rRNA metabolic process; RNA processing; ncRNA processing; cellular component biogenesis; ribonucleoprotein complex biogenesis; cellular aromatic compound metabolic process; rRNA modification; nitrogen compound metabolic process; ribosome biogenesis; organic cyclic compound metabolic process; primary metabolic process; cellular metabolic process; RNA modification; organic substance metabolic proce…	membrane; cytoplasm; macromolecular complex; intracellular part; cell; organelle part; preribosome; non-membrane-bounded organelle; membrane-enclosed lumen; nucleoplasm; intracellular organelle lumen; intracellular; cell part; small-subunit processome; membrane-bounded organelle; organelle lumen; intracellular organelle; intracellular non-membrane-bounded organelle; intracellular organelle part; …	snoRNA binding; organic cyclic compound binding; heterocyclic compound binding; cell adhesion molecule binding; RNA binding; binding; cadherin binding; nucleic acid binding; histone methyltransferase binding; protein binding; enzyme binding;	K14564	NOP56; nucleolar protein 56	hsa03008 Ribosome biogenesis in eukaryotes - Homo sapiens (human);	IPR002687; IPR012974; IPR012976;	Nop domain; NOP5, N-terminal; NOSIC;
O00571	594	S	ATP-dependent RNA helicase DDX3X	DDX3X	1	0.00704	71.221	FS(1)GGFGAR	2	-0.81339	2	0.523	0.0154	nucleus	cellular component biogenesis; single organism signaling; regulation of cell death; posttranscriptional regulation of gene expression; positive regulation of biosynthetic process; regulation of cell cycle process; cellular metabolic process; response to biotic stimulus; positive regulation of growth; regulation of cell growth; negative regulation of peptidase activity; metabolic process; macromol…	secretory granule lumen; membrane; outer membrane; extracellular region part; organelle membrane; cytoplasmic vesicle; vesicle; cytoplasm; cytoplasmic vesicle part; macromolecular complex; intracellular part; nuclear body; cell; ficolin-1-rich granule lumen; cytoplasmic ribonucleoprotein granule; organelle part; non-membrane-bounded organelle; mitochondrial envelope; extracellular exosome; membra…	mRNA 5'-UTR binding; nucleoside phosphate binding; ATP-dependent helicase activity; hydrolase activity, acting on acid anhydrides; protein binding; hydrolase activity; CTPase activity; ATPase activity; heterocyclic compound binding; organic cyclic compound binding; mRNA binding; pyrophosphatase activity; ribonucleotide binding; catalytic activity; ribosomal small subunit binding; translation init…	K11594	DDX3X; ATP-dependent RNA helicase DDX3X [EC:3.6.4.13]	hsa04622 RIG-I-like receptor signaling pathway - Homo sapiens (human); hsa05161 Hepatitis B - Homo sapiens (human); hsa05203 Viral carcinogenesis - Homo sapiens (human);	IPR014014; IPR011545; IPR014001; IPR027417; IPR001650;	RNA helicase, DEAD-box type, Q motif; DEAD/DEAH box helicase domain; Helicase superfamily 1/2, ATP-binding domain; P-loop containing nucleoside triphosphate hydrolase; Helicase, C-terminal;
O00629	60	S	Importin subunit alpha-3	KPNA4	0.999986	3.3e-05	57.829	NVPHEDICEDS(1)DIDGDYR	3	0.7411	1			cytoplasm	regulation of biological quality; NLS-bearing protein import into nucleus; establishment of protein localization to organelle; protein import; single-organism process; multi-organism cellular localization; nuclear transport; multi-organism cellular process; modification of morphology or physiology of other organism; protein transport; modulation by symbiont of host cellular process; establishment…	extracellular region part; vesicle; cytoplasm; macromolecular complex; intracellular part; cell; organelle part; membrane-enclosed lumen; extracellular exosome; nucleoplasm; intracellular organelle lumen; cell part; intracellular; extracellular vesicle; membrane-bounded organelle; organelle lumen; intracellular organelle; nuclear pore; nuclear envelope; organelle envelope; intracellular organelle…	signal sequence binding; protein transporter activity; peptide binding; binding; nuclear localization sequence binding; substrate-specific transporter activity; protein binding; amide binding; transporter activity;				IPR002652; IPR011989; IPR016024;	Importin-alpha, importin-beta-binding domain; Armadillo-like helical; Armadillo-type fold;
O00712	264	S	Nuclear factor 1 B-type	NFIB	0.839252	0.00237	74.611	SLS(0.839)S(0.159)PPS(0.001)SK	2	-0.50357	1			nucleus	gland development; nucleic acid-templated transcription; brain development; respiratory tube development; tube formation; positive regulation of biosynthetic process; cellular component morphogenesis; cellular metabolic process; negative regulation of cell proliferation; telencephalon development; neural nucleus development; response to external stimulus; metabolic process; regulation of epitheli…	intracellular organelle; cell projection; intracellular non-membrane-bounded organelle; intracellular organelle part; nuclear lumen; nucleolar part; intracellular part; nucleolus; cerebellar mossy fiber; cell; fibrillar center; organelle part; non-membrane-bounded organelle; intracellular membrane-bounded organelle; organelle; membrane-enclosed lumen; axon; nucleus; intracellular organelle lumen;…	RNA polymerase II transcription factor activity, sequence-specific DNA binding; transcriptional activator activity, RNA polymerase II core promoter proximal region sequence-specific binding; double-stranded DNA binding; core promoter proximal region sequence-specific DNA binding; transcription factor activity, sequence-specific DNA binding; regulatory region DNA binding; heterocyclic compound bin…	K09169			IPR019548; IPR003619; IPR020604;	CTF transcription factor/nuclear factor 1, N-terminal; MAD homology 1, Dwarfin-type; CTF transcription factor/nuclear factor 1, DNA-binding domain;
O00757	216	Y	Fructose-1,6-bisphosphatase isozyme 2	FBP2	1	1.88e-14	169.52	IYSLNEGY(1)AK	2	-0.15509	2	0.757	0.238	cytoplasm	sucrose biosynthetic process; carbohydrate biosynthetic process; hexose biosynthetic process; single-organism process; monosaccharide biosynthetic process; fructose 6-phosphate metabolic process; biosynthetic process; disaccharide metabolic process; cellular metabolic process; phosphate-containing compound metabolic process; organic substance metabolic process; glucose metabolic process; metaboli…	membrane; extracellular region part; cell periphery; cell junction; myofibril; vesicle; cytoplasm; supramolecular fiber; intracellular part; Z disc; supramolecular complex; cell; I band; organelle part; non-membrane-bounded organelle; membrane-enclosed lumen; extracellular exosome; nucleoplasm; intracellular organelle lumen; intracellular; cell part; extracellular vesicle; contractile fiber; memb…	carbohydrate phosphatase activity; identical protein binding; catalytic activity; phosphoric ester hydrolase activity; binding; phosphatase activity; ion binding; hydrolase activity, acting on ester bonds; metal ion binding; cation binding; hydrolase activity; protein binding; sugar-phosphatase activity; fructose 1,6-bisphosphate 1-phosphatase activity;	K03841	FBP; fructose-1,6-bisphosphatase I [EC:3.1.3.11]	hsa00051 Fructose and mannose metabolism - Homo sapiens (human); hsa01100 Metabolic pathways - Homo sapiens (human); hsa04922 Glucagon signaling pathway - Homo sapiens (human); hsa04910 Insulin signaling pathway - Homo sapiens (human); hsa01200 Carbon metabolism - Homo sapiens (human); hsa04152 AMPK signaling pathway - Homo sapiens (human); hsa00010 Glycolysis / Gluconeogenesis - Homo sapiens (hu…	IPR033391;	Fructose-1-6-bisphosphatase class I, N-terminal;
O00763	1408	S	Acetyl-CoA carboxylase 2	ACACB	0.991556	0.000652	66.989	T(0.001)S(0.006)LY(0.001)S(0.992)EDDCK	2	2.547	1			plasma membrane	cellular component biogenesis; regulation of biological quality; cellular lipid metabolic process; regulation of lipid metabolic process; cellular metabolic process; sulfur compound biosynthetic process; positive regulation of growth; lipid biosynthetic process; response to external stimulus; metabolic process; monocarboxylic acid transport; positive regulation of multicellular organismal process…	intracellular organelle; membrane; outer membrane; mitochondrial part; bounding membrane of organelle; organelle membrane; mitochondrial outer membrane; cytoplasm; intracellular organelle part; organelle envelope; endomembrane system; intracellular part; cytosol; cell; organelle part; mitochondrion; organelle; intracellular membrane-bounded organelle; mitochondrial envelope; nucleus; intracellula…	nucleoside phosphate binding; ligase activity, forming carbon-carbon bonds; ligase activity; protein binding; acetyl-CoA carboxylase activity; organic cyclic compound binding; heterocyclic compound binding; carboxylic acid binding; ribonucleotide binding; catalytic activity; binding; purine ribonucleoside binding; cation binding; anion binding; adenyl ribonucleotide binding; adenyl nucleotide bin…	K01946	ACACB; acetyl-CoA carboxylase / biotin carboxylase 2 [EC:6.4.1.2 6.3.4.14]	hsa00061 Fatty acid biosynthesis - Homo sapiens (human); hsa04920 Adipocytokine signaling pathway - Homo sapiens (human); hsa00640 Propanoate metabolism - Homo sapiens (human); hsa00620 Pyruvate metabolism - Homo sapiens (human); hsa01100 Metabolic pathways - Homo sapiens (human); hsa04922 Glucagon signaling pathway - Homo sapiens (human); hsa04910 Insulin signaling pathway - Homo sapiens (human)…	IPR011762; IPR000022; IPR029045; IPR005481; IPR000089; IPR016185; IPR011761; IPR005482; IPR011053; IPR005479; IPR013815; IPR013537; IPR011764; IPR013816; IPR011763; IPR011054;	Acetyl-coenzyme A carboxyltransferase, N-terminal; Carboxyl transferase; ClpP/crotonase-like domain; Biotin carboxylase-like, N-terminal domain; Biotin/lipoyl attachment; Pre-ATP-grasp domain; ATP-grasp fold; Biotin carboxylase, C-terminal; Single hybrid motif; Carbamoyl-phosphate synthetase large subunit-like, ATP-binding domain; ATP-grasp fold, subdomain 1; Acetyl-CoA carboxylase, central domai…
O00763	1342	T	Acetyl-CoA carboxylase 2	ACACB	0.999722	9.45e-24	180.1	MTVPISIT(1)NPDLLR	3	0.30898	7	0.818	0.55	plasma membrane	cellular component biogenesis; regulation of biological quality; cellular lipid metabolic process; regulation of lipid metabolic process; cellular metabolic process; sulfur compound biosynthetic process; positive regulation of growth; lipid biosynthetic process; response to external stimulus; metabolic process; monocarboxylic acid transport; positive regulation of multicellular organismal process…	intracellular organelle; membrane; outer membrane; mitochondrial part; bounding membrane of organelle; organelle membrane; mitochondrial outer membrane; cytoplasm; intracellular organelle part; organelle envelope; endomembrane system; intracellular part; cytosol; cell; organelle part; mitochondrion; organelle; intracellular membrane-bounded organelle; mitochondrial envelope; nucleus; intracellula…	nucleoside phosphate binding; ligase activity, forming carbon-carbon bonds; ligase activity; protein binding; acetyl-CoA carboxylase activity; organic cyclic compound binding; heterocyclic compound binding; carboxylic acid binding; ribonucleotide binding; catalytic activity; binding; purine ribonucleoside binding; cation binding; anion binding; adenyl ribonucleotide binding; adenyl nucleotide bin…	K01946	ACACB; acetyl-CoA carboxylase / biotin carboxylase 2 [EC:6.4.1.2 6.3.4.14]	hsa00061 Fatty acid biosynthesis - Homo sapiens (human); hsa04920 Adipocytokine signaling pathway - Homo sapiens (human); hsa00640 Propanoate metabolism - Homo sapiens (human); hsa00620 Pyruvate metabolism - Homo sapiens (human); hsa01100 Metabolic pathways - Homo sapiens (human); hsa04922 Glucagon signaling pathway - Homo sapiens (human); hsa04910 Insulin signaling pathway - Homo sapiens (human)…	IPR011762; IPR000022; IPR029045; IPR005481; IPR000089; IPR016185; IPR011761; IPR005482; IPR011053; IPR005479; IPR013815; IPR013537; IPR011764; IPR013816; IPR011763; IPR011054;	Acetyl-coenzyme A carboxyltransferase, N-terminal; Carboxyl transferase; ClpP/crotonase-like domain; Biotin carboxylase-like, N-terminal domain; Biotin/lipoyl attachment; Pre-ATP-grasp domain; ATP-grasp fold; Biotin carboxylase, C-terminal; Single hybrid motif; Carbamoyl-phosphate synthetase large subunit-like, ATP-binding domain; ATP-grasp fold, subdomain 1; Acetyl-CoA carboxylase, central domai…
O00763	91	S	Acetyl-CoA carboxylase 2	ACACB	1	1.5e-09	137.91	RNS(1)LPPSHQKPPR	4	-0.13901	18	0.549	0.000726	plasma membrane	cellular component biogenesis; regulation of biological quality; cellular lipid metabolic process; regulation of lipid metabolic process; cellular metabolic process; sulfur compound biosynthetic process; positive regulation of growth; lipid biosynthetic process; response to external stimulus; metabolic process; monocarboxylic acid transport; positive regulation of multicellular organismal process…	intracellular organelle; membrane; outer membrane; mitochondrial part; bounding membrane of organelle; organelle membrane; mitochondrial outer membrane; cytoplasm; intracellular organelle part; organelle envelope; endomembrane system; intracellular part; cytosol; cell; organelle part; mitochondrion; organelle; intracellular membrane-bounded organelle; mitochondrial envelope; nucleus; intracellula…	nucleoside phosphate binding; ligase activity, forming carbon-carbon bonds; ligase activity; protein binding; acetyl-CoA carboxylase activity; organic cyclic compound binding; heterocyclic compound binding; carboxylic acid binding; ribonucleotide binding; catalytic activity; binding; purine ribonucleoside binding; cation binding; anion binding; adenyl ribonucleotide binding; adenyl nucleotide bin…	K01946	ACACB; acetyl-CoA carboxylase / biotin carboxylase 2 [EC:6.4.1.2 6.3.4.14]	hsa00061 Fatty acid biosynthesis - Homo sapiens (human); hsa04920 Adipocytokine signaling pathway - Homo sapiens (human); hsa00640 Propanoate metabolism - Homo sapiens (human); hsa00620 Pyruvate metabolism - Homo sapiens (human); hsa01100 Metabolic pathways - Homo sapiens (human); hsa04922 Glucagon signaling pathway - Homo sapiens (human); hsa04910 Insulin signaling pathway - Homo sapiens (human)…	IPR011762; IPR000022; IPR029045; IPR005481; IPR000089; IPR016185; IPR011761; IPR005482; IPR011053; IPR005479; IPR013815; IPR013537; IPR011764; IPR013816; IPR011763; IPR011054;	Acetyl-coenzyme A carboxyltransferase, N-terminal; Carboxyl transferase; ClpP/crotonase-like domain; Biotin carboxylase-like, N-terminal domain; Biotin/lipoyl attachment; Pre-ATP-grasp domain; ATP-grasp fold; Biotin carboxylase, C-terminal; Single hybrid motif; Carbamoyl-phosphate synthetase large subunit-like, ATP-binding domain; ATP-grasp fold, subdomain 1; Acetyl-CoA carboxylase, central domai…
O00763	222	S	Acetyl-CoA carboxylase 2	ACACB	0.999006	0.000219	84.365	PS(0.001)MS(0.999)GLHLVK	2	0.16315	8	0.649	0.00249	plasma membrane	cellular component biogenesis; regulation of biological quality; cellular lipid metabolic process; regulation of lipid metabolic process; cellular metabolic process; sulfur compound biosynthetic process; positive regulation of growth; lipid biosynthetic process; response to external stimulus; metabolic process; monocarboxylic acid transport; positive regulation of multicellular organismal process…	intracellular organelle; membrane; outer membrane; mitochondrial part; bounding membrane of organelle; organelle membrane; mitochondrial outer membrane; cytoplasm; intracellular organelle part; organelle envelope; endomembrane system; intracellular part; cytosol; cell; organelle part; mitochondrion; organelle; intracellular membrane-bounded organelle; mitochondrial envelope; nucleus; intracellula…	nucleoside phosphate binding; ligase activity, forming carbon-carbon bonds; ligase activity; protein binding; acetyl-CoA carboxylase activity; organic cyclic compound binding; heterocyclic compound binding; carboxylic acid binding; ribonucleotide binding; catalytic activity; binding; purine ribonucleoside binding; cation binding; anion binding; adenyl ribonucleotide binding; adenyl nucleotide bin…	K01946	ACACB; acetyl-CoA carboxylase / biotin carboxylase 2 [EC:6.4.1.2 6.3.4.14]	hsa00061 Fatty acid biosynthesis - Homo sapiens (human); hsa04920 Adipocytokine signaling pathway - Homo sapiens (human); hsa00640 Propanoate metabolism - Homo sapiens (human); hsa00620 Pyruvate metabolism - Homo sapiens (human); hsa01100 Metabolic pathways - Homo sapiens (human); hsa04922 Glucagon signaling pathway - Homo sapiens (human); hsa04910 Insulin signaling pathway - Homo sapiens (human)…	IPR011762; IPR000022; IPR029045; IPR005481; IPR000089; IPR016185; IPR011761; IPR005482; IPR011053; IPR005479; IPR013815; IPR013537; IPR011764; IPR013816; IPR011763; IPR011054;	Acetyl-coenzyme A carboxyltransferase, N-terminal; Carboxyl transferase; ClpP/crotonase-like domain; Biotin carboxylase-like, N-terminal domain; Biotin/lipoyl attachment; Pre-ATP-grasp domain; ATP-grasp fold; Biotin carboxylase, C-terminal; Single hybrid motif; Carbamoyl-phosphate synthetase large subunit-like, ATP-binding domain; ATP-grasp fold, subdomain 1; Acetyl-CoA carboxylase, central domai…
O00763	469	S	Acetyl-CoA carboxylase 2	ACACB	1	3.25e-11	146.88	KAES(1)AEDFPILFR	3	0.031556	1	0.338	0.0231	plasma membrane	cellular component biogenesis; regulation of biological quality; cellular lipid metabolic process; regulation of lipid metabolic process; cellular metabolic process; sulfur compound biosynthetic process; positive regulation of growth; lipid biosynthetic process; response to external stimulus; metabolic process; monocarboxylic acid transport; positive regulation of multicellular organismal process…	intracellular organelle; membrane; outer membrane; mitochondrial part; bounding membrane of organelle; organelle membrane; mitochondrial outer membrane; cytoplasm; intracellular organelle part; organelle envelope; endomembrane system; intracellular part; cytosol; cell; organelle part; mitochondrion; organelle; intracellular membrane-bounded organelle; mitochondrial envelope; nucleus; intracellula…	nucleoside phosphate binding; ligase activity, forming carbon-carbon bonds; ligase activity; protein binding; acetyl-CoA carboxylase activity; organic cyclic compound binding; heterocyclic compound binding; carboxylic acid binding; ribonucleotide binding; catalytic activity; binding; purine ribonucleoside binding; cation binding; anion binding; adenyl ribonucleotide binding; adenyl nucleotide bin…	K01946	ACACB; acetyl-CoA carboxylase / biotin carboxylase 2 [EC:6.4.1.2 6.3.4.14]	hsa00061 Fatty acid biosynthesis - Homo sapiens (human); hsa04920 Adipocytokine signaling pathway - Homo sapiens (human); hsa00640 Propanoate metabolism - Homo sapiens (human); hsa00620 Pyruvate metabolism - Homo sapiens (human); hsa01100 Metabolic pathways - Homo sapiens (human); hsa04922 Glucagon signaling pathway - Homo sapiens (human); hsa04910 Insulin signaling pathway - Homo sapiens (human)…	IPR011762; IPR000022; IPR029045; IPR005481; IPR000089; IPR016185; IPR011761; IPR005482; IPR011053; IPR005479; IPR013815; IPR013537; IPR011764; IPR013816; IPR011763; IPR011054;	Acetyl-coenzyme A carboxyltransferase, N-terminal; Carboxyl transferase; ClpP/crotonase-like domain; Biotin carboxylase-like, N-terminal domain; Biotin/lipoyl attachment; Pre-ATP-grasp domain; ATP-grasp fold; Biotin carboxylase, C-terminal; Single hybrid motif; Carbamoyl-phosphate synthetase large subunit-like, ATP-binding domain; ATP-grasp fold, subdomain 1; Acetyl-CoA carboxylase, central domai…
O14494	271	T	Phospholipid phosphatase 1	PLPP1	0.841973	2.01e-11	80.729	KEEDS(0.002)HT(0.027)T(0.027)LHET(0.842)PT(0.083)T(0.016)GNHY(0.004)PSNHQP	5	0.68197	1	1.318	0.447	plasma membrane	single organism signaling; protein kinase C-activating G-protein coupled receptor signaling pathway; localization of cell; reproductive process; membrane lipid metabolic process; germ cell migration; single-organism process; biosynthetic process; cellular lipid metabolic process; regulation of lipid metabolic process; cellular metabolic process; cellular response to steroid hormone stimulus; phos…	membrane; extracellular region part; intrinsic component of plasma membrane; cell periphery; vesicle; intrinsic component of membrane; integral component of plasma membrane; cell; extracellular region; integral component of membrane; plasma membrane; organelle; extracellular exosome; plasma membrane part; cell part; membrane part; extracellular vesicle; membrane-bounded organelle; extracellular o…	sphingosine-1-phosphate phosphatase activity; catalytic activity; phosphoric ester hydrolase activity; phosphatase activity; hydrolase activity, acting on ester bonds; lipid phosphatase activity; hydrolase activity; phosphatidate phosphatase activity;	K01080	PPAP2; phosphatidate phosphatase [EC:3.1.3.4]	hsa04975 Fat digestion and absorption - Homo sapiens (human); hsa04666 Fc gamma R-mediated phagocytosis - Homo sapiens (human); hsa05231 Choline metabolism in cancer - Homo sapiens (human); hsa04072 Phospholipase D signaling pathway - Homo sapiens (human); hsa00564 Glycerophospholipid metabolism - Homo sapiens (human); hsa01100 Metabolic pathways - Homo sapiens (human); hsa00600 Sphingolipid meta…	IPR000326;	Phosphatidic acid phosphatase type 2/haloperoxidase;
O14497	1755	S	AT-rich interactive domain-containing protein 1A	ARID1A	0.800058	3.08e-13	122.47	VS(0.2)S(0.8)PAPMEGGEEEEELLGPK	3	0.13459	2	0.994	0.935	cytoplasm	single organism signaling; reproductive process; nucleic acid-templated transcription; tube formation; chordate embryonic development; brain development; embryo implantation; positive regulation of biosynthetic process; cellular metabolic process; placenta blood vessel development; metabolic process; heart development; embryonic organ morphogenesis; multi-multicellular organism process; single or…	macromolecular complex; intracellular part; cell; SWI/SNF superfamily-type complex; organelle part; nBAF complex; chromosomal part; non-membrane-bounded organelle; membrane-enclosed lumen; nucleoplasm; intracellular organelle lumen; nuclear chromosome part; cell part; intracellular; chromosome; nuclear chromatin; npBAF complex; membrane-bounded organelle; neuron part; organelle lumen; intracellul…	organic cyclic compound binding; heterocyclic compound binding; DNA binding; receptor binding; binding; macromolecular complex binding; ligand-dependent nuclear receptor binding; nucleic acid binding; transcription factor activity, transcription factor binding; nucleosome binding; transcription coactivator activity; protein binding; chromatin binding; transcription cofactor activity; transcriptio…	K11653			IPR033388; IPR011989; IPR016024; IPR001606;	SWI/SNF-like complex subunit BAF250, C-terminal; Armadillo-like helical; Armadillo-type fold; ARID DNA-binding domain;
O14497	363	S	AT-rich interactive domain-containing protein 1A	ARID1A	0.999801	3.58e-18	128.01	SHHAPMS(1)PGSSGGGGQPLAR	3	-0.053066	13	0.746	0.258	cytoplasm	single organism signaling; reproductive process; nucleic acid-templated transcription; tube formation; chordate embryonic development; brain development; embryo implantation; positive regulation of biosynthetic process; cellular metabolic process; placenta blood vessel development; metabolic process; heart development; embryonic organ morphogenesis; multi-multicellular organism process; single or…	macromolecular complex; intracellular part; cell; SWI/SNF superfamily-type complex; organelle part; nBAF complex; chromosomal part; non-membrane-bounded organelle; membrane-enclosed lumen; nucleoplasm; intracellular organelle lumen; nuclear chromosome part; cell part; intracellular; chromosome; nuclear chromatin; npBAF complex; membrane-bounded organelle; neuron part; organelle lumen; intracellul…	organic cyclic compound binding; heterocyclic compound binding; DNA binding; receptor binding; binding; macromolecular complex binding; ligand-dependent nuclear receptor binding; nucleic acid binding; transcription factor activity, transcription factor binding; nucleosome binding; transcription coactivator activity; protein binding; chromatin binding; transcription cofactor activity; transcriptio…	K11653			IPR033388; IPR011989; IPR016024; IPR001606;	SWI/SNF-like complex subunit BAF250, C-terminal; Armadillo-like helical; Armadillo-type fold; ARID DNA-binding domain;
O14497	382	S	AT-rich interactive domain-containing protein 1A	ARID1A	0.802181	0.00417	44.734	T(0.017)PQPS(0.181)S(0.802)PMDQMGK	3	0.19764	1	0.703	0.0525	cytoplasm	single organism signaling; reproductive process; nucleic acid-templated transcription; tube formation; chordate embryonic development; brain development; embryo implantation; positive regulation of biosynthetic process; cellular metabolic process; placenta blood vessel development; metabolic process; heart development; embryonic organ morphogenesis; multi-multicellular organism process; single or…	macromolecular complex; intracellular part; cell; SWI/SNF superfamily-type complex; organelle part; nBAF complex; chromosomal part; non-membrane-bounded organelle; membrane-enclosed lumen; nucleoplasm; intracellular organelle lumen; nuclear chromosome part; cell part; intracellular; chromosome; nuclear chromatin; npBAF complex; membrane-bounded organelle; neuron part; organelle lumen; intracellul…	organic cyclic compound binding; heterocyclic compound binding; DNA binding; receptor binding; binding; macromolecular complex binding; ligand-dependent nuclear receptor binding; nucleic acid binding; transcription factor activity, transcription factor binding; nucleosome binding; transcription coactivator activity; protein binding; chromatin binding; transcription cofactor activity; transcriptio…	K11653			IPR033388; IPR011989; IPR016024; IPR001606;	SWI/SNF-like complex subunit BAF250, C-terminal; Armadillo-like helical; Armadillo-type fold; ARID DNA-binding domain;
O14497	1751	S	AT-rich interactive domain-containing protein 1A	ARID1A	0.999971	0.00307	61.11	TLLDPGRFS(1)K	3	0.20232	1	0.890	0.506	cytoplasm	single organism signaling; reproductive process; nucleic acid-templated transcription; tube formation; chordate embryonic development; brain development; embryo implantation; positive regulation of biosynthetic process; cellular metabolic process; placenta blood vessel development; metabolic process; heart development; embryonic organ morphogenesis; multi-multicellular organism process; single or…	macromolecular complex; intracellular part; cell; SWI/SNF superfamily-type complex; organelle part; nBAF complex; chromosomal part; non-membrane-bounded organelle; membrane-enclosed lumen; nucleoplasm; intracellular organelle lumen; nuclear chromosome part; cell part; intracellular; chromosome; nuclear chromatin; npBAF complex; membrane-bounded organelle; neuron part; organelle lumen; intracellul…	organic cyclic compound binding; heterocyclic compound binding; DNA binding; receptor binding; binding; macromolecular complex binding; ligand-dependent nuclear receptor binding; nucleic acid binding; transcription factor activity, transcription factor binding; nucleosome binding; transcription coactivator activity; protein binding; chromatin binding; transcription cofactor activity; transcriptio…	K11653			IPR033388; IPR011989; IPR016024; IPR001606;	SWI/SNF-like complex subunit BAF250, C-terminal; Armadillo-like helical; Armadillo-type fold; ARID DNA-binding domain;
O14497	696	S	AT-rich interactive domain-containing protein 1A	ARID1A	0.993612	6.94e-29	172.57	GPS(0.994)PS(0.006)PVGSPASVAQSR	2	1.1892	6	0.864	0.345	cytoplasm	single organism signaling; reproductive process; nucleic acid-templated transcription; tube formation; chordate embryonic development; brain development; embryo implantation; positive regulation of biosynthetic process; cellular metabolic process; placenta blood vessel development; metabolic process; heart development; embryonic organ morphogenesis; multi-multicellular organism process; single or…	macromolecular complex; intracellular part; cell; SWI/SNF superfamily-type complex; organelle part; nBAF complex; chromosomal part; non-membrane-bounded organelle; membrane-enclosed lumen; nucleoplasm; intracellular organelle lumen; nuclear chromosome part; cell part; intracellular; chromosome; nuclear chromatin; npBAF complex; membrane-bounded organelle; neuron part; organelle lumen; intracellul…	organic cyclic compound binding; heterocyclic compound binding; DNA binding; receptor binding; binding; macromolecular complex binding; ligand-dependent nuclear receptor binding; nucleic acid binding; transcription factor activity, transcription factor binding; nucleosome binding; transcription coactivator activity; protein binding; chromatin binding; transcription cofactor activity; transcriptio…	K11653			IPR033388; IPR011989; IPR016024; IPR001606;	SWI/SNF-like complex subunit BAF250, C-terminal; Armadillo-like helical; Armadillo-type fold; ARID DNA-binding domain;
O14523	613	S	C2 domain-containing protein 2-like	C2CD2L	0.985587	9.73e-12	82.413	SDIS(0.014)ERPS(0.986)VDDIESETGSTGALETR	3	-0.23827	2			extracellular	regulation of cellular process; regulation of biological quality; positive regulation of insulin secretion involved in cellular response to glucose stimulus; regulation of insulin secretion; regulation of signaling; regulation of secretion; positive regulation of peptide secretion; regulation of homeostatic process; regulation of establishment of protein localization; positive regulation of pepti…	intrinsic component of membrane; membrane; integral component of membrane; membrane part;	insulin binding; protein binding; amide binding; peptide hormone binding; peptide binding; hormone binding; binding;				IPR000008;	C2 domain;
O14523	468	S	C2 domain-containing protein 2-like	C2CD2L	0.884226	8.99e-05	63.225	LDS(0.014)PS(0.057)RS(0.884)PS(0.044)KVEVTEK	4	0.69041	1			extracellular	regulation of cellular process; regulation of biological quality; positive regulation of insulin secretion involved in cellular response to glucose stimulus; regulation of insulin secretion; regulation of signaling; regulation of secretion; positive regulation of peptide secretion; regulation of homeostatic process; regulation of establishment of protein localization; positive regulation of pepti…	intrinsic component of membrane; membrane; integral component of membrane; membrane part;	insulin binding; protein binding; amide binding; peptide hormone binding; peptide binding; hormone binding; binding;				IPR000008;	C2 domain;
O14523	662	S	C2 domain-containing protein 2-like	C2CD2L	0.965633	4.14e-14	124.51	EAGLS(0.034)QS(0.966)HDDLSNATATPSVR	3	0.47315	1			extracellular	regulation of cellular process; regulation of biological quality; positive regulation of insulin secretion involved in cellular response to glucose stimulus; regulation of insulin secretion; regulation of signaling; regulation of secretion; positive regulation of peptide secretion; regulation of homeostatic process; regulation of establishment of protein localization; positive regulation of pepti…	intrinsic component of membrane; membrane; integral component of membrane; membrane part;	insulin binding; protein binding; amide binding; peptide hormone binding; peptide binding; hormone binding; binding;				IPR000008;	C2 domain;
O14523	623	S	C2 domain-containing protein 2-like	C2CD2L	0.917299	1.2e-21	105.71	SDISERPSVDDIESET(0.018)GS(0.917)T(0.065)GALETR	3	-1.5981	1			extracellular	regulation of cellular process; regulation of biological quality; positive regulation of insulin secretion involved in cellular response to glucose stimulus; regulation of insulin secretion; regulation of signaling; regulation of secretion; positive regulation of peptide secretion; regulation of homeostatic process; regulation of establishment of protein localization; positive regulation of pepti…	intrinsic component of membrane; membrane; integral component of membrane; membrane part;	insulin binding; protein binding; amide binding; peptide hormone binding; peptide binding; hormone binding; binding;				IPR000008;	C2 domain;
O14523	411	S	C2 domain-containing protein 2-like	C2CD2L	0.99191	0.000302	49.067	ALGPAATMAVELHY(0.008)EEGS(0.992)PR	3	-0.77825	1			extracellular	regulation of cellular process; regulation of biological quality; positive regulation of insulin secretion involved in cellular response to glucose stimulus; regulation of insulin secretion; regulation of signaling; regulation of secretion; positive regulation of peptide secretion; regulation of homeostatic process; regulation of establishment of protein localization; positive regulation of pepti…	intrinsic component of membrane; membrane; integral component of membrane; membrane part;	insulin binding; protein binding; amide binding; peptide hormone binding; peptide binding; hormone binding; binding;				IPR000008;	C2 domain;
O14545	327	S	TRAF-type zinc finger domain-containing protein 1	TRAFD1	0.994515	1.35e-20	171.87	ALPSLNTGSS(0.005)S(0.995)PR	2	0.45111	7	0.810	0.0398	nucleus	negative regulation of innate immune response; negative regulation of immune system process; regulation of biological process; regulation of innate immune response; regulation of response to stimulus; negative regulation of immune response; regulation of immune system process; regulation of response to stress; negative regulation of biological process; negative regulation of response to stimulus;…		metal ion binding; cation binding; protein binding; binding; ion binding;
O14545	326	S	TRAF-type zinc finger domain-containing protein 1	TRAFD1	0.760602	8.91e-09	128.71	ALPSLNTGS(0.047)S(0.761)S(0.193)PR	3	0.59596	2	0.735	0.0465	nucleus	negative regulation of innate immune response; negative regulation of immune system process; regulation of biological process; regulation of innate immune response; regulation of response to stimulus; negative regulation of immune response; regulation of immune system process; regulation of response to stress; negative regulation of biological process; negative regulation of response to stimulus;…		metal ion binding; cation binding; protein binding; binding; ion binding;
O14545	415	S	TRAF-type zinc finger domain-containing protein 1	TRAFD1	0.974405	6.85e-31	184.22	LDSQPQET(0.026)S(0.974)PELPR	2	0.86419	4	0.963	0.713	nucleus	negative regulation of innate immune response; negative regulation of immune system process; regulation of biological process; regulation of innate immune response; regulation of response to stimulus; negative regulation of immune response; regulation of immune system process; regulation of response to stress; negative regulation of biological process; negative regulation of response to stimulus;…		metal ion binding; cation binding; protein binding; binding; ion binding;
O14558	16	S	Heat shock protein beta-6	HSPB6	0.999798	0.00053	74.778	RAS(1)APLPGLSAPGR	3	2.2873	3	1.795	0.0852	cytoplasm,nucleus	regulation of cellular process; negative regulation of cardiac muscle cell apoptotic process; regulation of cell death; negative regulation of programmed cell death; chaperone-mediated protein folding; regulation of programmed cell death; negative regulation of biological process; regulation of cardiac muscle cell apoptotic process; negative regulation of cellular process; positive regulation of …	organelle; intracellular membrane-bounded organelle; intracellular organelle; nucleus; cell part; intracellular; cytoplasm; intracellular part; membrane-bounded organelle; cell; extracellular region;	structural constituent of eye lens; identical protein binding; chaperone binding; protein homodimerization activity; binding; protein dimerization activity; protein binding; unfolded protein binding; structural molecule activity;	K09545			IPR002068; IPR003090; IPR008978;	Alpha crystallin/Hsp20 domain; Alpha-crystallin, N-terminal; HSP20-like chaperone;
O14579	99	S	Coatomer subunit epsilon	COPE	1	3.43e-07	140.03	RDS(1)IVAELDR	3	-0.26012	3	1.005	0.955	cytoplasm	intracellular transport; intra-Golgi vesicle-mediated transport; vesicle-mediated transport; Golgi vesicle transport; organic substance transport; protein transport; cellular localization; establishment of localization; transport; establishment of protein localization; establishment of localization in cell; retrograde vesicle-mediated transport, Golgi to ER; localization; macromolecule localizati…	membrane; endoplasmic reticulum; nuclear outer membrane-endoplasmic reticulum membrane network; organelle membrane; cytoplasmic vesicle; membrane protein complex; COPI-coated vesicle; Golgi-associated vesicle membrane; cytoplasm; vesicle; cytoplasmic vesicle part; macromolecular complex; intracellular part; vesicle coat; COPI-coated vesicle membrane; cell; coated vesicle membrane; organelle part;…	protein binding; structural molecule activity; binding;	K17268			IPR011990;	Tetratricopeptide-like helical domain;
O14579	307	S	Coatomer subunit epsilon	COPE	0.999986	0.00545	67.113	LVLQYAPS(1)A	2	-0.98503	1	0.615	0.019	cytoplasm	intracellular transport; intra-Golgi vesicle-mediated transport; vesicle-mediated transport; Golgi vesicle transport; organic substance transport; protein transport; cellular localization; establishment of localization; transport; establishment of protein localization; establishment of localization in cell; retrograde vesicle-mediated transport, Golgi to ER; localization; macromolecule localizati…	membrane; endoplasmic reticulum; nuclear outer membrane-endoplasmic reticulum membrane network; organelle membrane; cytoplasmic vesicle; membrane protein complex; COPI-coated vesicle; Golgi-associated vesicle membrane; cytoplasm; vesicle; cytoplasmic vesicle part; macromolecular complex; intracellular part; vesicle coat; COPI-coated vesicle membrane; cell; coated vesicle membrane; organelle part;…	protein binding; structural molecule activity; binding;	K17268			IPR011990;	Tetratricopeptide-like helical domain;
O14617	829	S	AP-3 complex subunit delta-1	AP3D1	0.90127	2.91e-05	78.354	NT(0.002)ET(0.022)S(0.074)KS(0.901)PEKDVPMVEK	3	1.0805	5	1.186	0.571	cytoplasm	regulation of leukocyte activation; developmental maturation; regulation of biological quality; protein transport; response to external stimulus; vesicle-mediated transport in synapse; metabolic process; positive regulation of multicellular organismal process; regulation of localization; synaptic vesicle transport along microtubule; protein localization to organelle; positive regulation of lympho…	membrane; AP-type membrane coat adaptor complex; organelle membrane; cytoplasmic vesicle; membrane protein complex; presynaptic endosome; cytoplasmic region; cytoplasm; vesicle; cell projection cytoplasm; cytoplasmic vesicle part; macromolecular complex; intracellular part; cell; axon terminus; organelle part; AP-3 adaptor complex; lysosomal membrane; membrane part; presynapse; cell part; intrace…	binding; transporter activity;	K12396	AP3D; AP-3 complex subunit delta	hsa04142 Lysosome - Homo sapiens (human);	IPR011989; IPR016024; IPR002553;	Armadillo-like helical; Armadillo-type fold; Clathrin/coatomer adaptor, adaptin-like, N-terminal;
O14617	658	S	AP-3 complex subunit delta-1	AP3D1	1	1.35e-11	151.39	HRPS(1)EADEEELAR	3	0.037177	2	0.640	0.144	cytoplasm	regulation of leukocyte activation; developmental maturation; regulation of biological quality; protein transport; response to external stimulus; vesicle-mediated transport in synapse; metabolic process; positive regulation of multicellular organismal process; regulation of localization; synaptic vesicle transport along microtubule; protein localization to organelle; positive regulation of lympho…	membrane; AP-type membrane coat adaptor complex; organelle membrane; cytoplasmic vesicle; membrane protein complex; presynaptic endosome; cytoplasmic region; cytoplasm; vesicle; cell projection cytoplasm; cytoplasmic vesicle part; macromolecular complex; intracellular part; cell; axon terminus; organelle part; AP-3 adaptor complex; lysosomal membrane; membrane part; presynapse; cell part; intrace…	binding; transporter activity;	K12396	AP3D; AP-3 complex subunit delta	hsa04142 Lysosome - Homo sapiens (human);	IPR011989; IPR016024; IPR002553;	Armadillo-like helical; Armadillo-type fold; Clathrin/coatomer adaptor, adaptin-like, N-terminal;
O14618	267	S	Copper chaperone for superoxide dismutase	CCS	1	0.000376	80.371	KES(1)AQPPAHL	3	-0.02875	2	0.721	0.0809	extracellular	superoxide metabolic process; intracellular transport; cellular response to stress; response to superoxide; metal ion transport; response to oxygen-containing compound; single-organism process; response to stimulus; cellular metabolic process; establishment of localization; removal of superoxide radicals; transition metal ion transport; metabolic process; establishment of localization in cell; ce…	organelle; intracellular membrane-bounded organelle; intracellular organelle; nucleus; cell part; intracellular; cytoplasm; intracellular part; membrane-bounded organelle; cell; cytosol; cytoplasmic part;	superoxide dismutase activity; protein disulfide oxidoreductase activity; oxidoreductase activity, acting on superoxide radicals as acceptor; ion binding; antioxidant activity; protein binding; copper ion binding; zinc ion binding; oxidoreductase activity; disulfide oxidoreductase activity; cell adhesion molecule binding; transition metal ion binding; catalytic activity; binding; cadherin binding…	K04569	CCS; copper chaperone for superoxide dismutase	hsa05014 Amyotrophic lateral sclerosis (ALS) - Homo sapiens (human);	IPR006121; IPR001424;	Heavy metal-associated domain, HMA; Superoxide dismutase, copper/zinc binding domain;
O14639	452	S	Actin-binding LIM protein 1	ABLIM1	0.982391	1.78e-31	193.19	S(0.001)T(0.016)S(0.982)QGS(0.001)INSPVYSR	2	1.895	6	0.531	0.00904	nucleus	cellular component biogenesis; single-multicellular organism process; cellular component organization; lamellipodium organization; visual perception; cilium assembly; single-organism process; cilium organization; neurological system process; anatomical structure morphogenesis; organelle assembly; cellular component assembly; multicellular organism development; cytoskeleton organization; cellular …	cell leading edge; intracellular organelle; cell projection; intracellular non-membrane-bounded organelle; cytoskeletal part; intracellular organelle part; cytoplasm; contractile actin filament bundle; intracellular part; cell; actin cytoskeleton; organelle part; actin filament bundle; non-membrane-bounded organelle; organelle; cytoskeleton; intracellular; cell part; lamellipodium; stress fiber; …	cytoskeletal protein binding; transition metal ion binding; binding; ion binding; actin binding; cation binding; metal ion binding; protein binding; zinc ion binding;	K07520	ABLIM; actin-binding LIM protein	hsa04360 Axon guidance - Homo sapiens (human);	IPR001781; IPR003128; IPR032402;	Zinc finger, LIM-type; Villin headpiece; Putative adherens-junction anchoring domain;
O14639	455	S	Actin-binding LIM protein 1	ABLIM1	0.987821	0.000205	77.631	S(0.291)T(0.291)S(0.423)QGS(0.988)INS(0.007)PVYSR	2	0.058057	2	0.574	0.0164	nucleus	cellular component biogenesis; single-multicellular organism process; cellular component organization; lamellipodium organization; visual perception; cilium assembly; single-organism process; cilium organization; neurological system process; anatomical structure morphogenesis; organelle assembly; cellular component assembly; multicellular organism development; cytoskeleton organization; cellular …	cell leading edge; intracellular organelle; cell projection; intracellular non-membrane-bounded organelle; cytoskeletal part; intracellular organelle part; cytoplasm; contractile actin filament bundle; intracellular part; cell; actin cytoskeleton; organelle part; actin filament bundle; non-membrane-bounded organelle; organelle; cytoskeleton; intracellular; cell part; lamellipodium; stress fiber; …	cytoskeletal protein binding; transition metal ion binding; binding; ion binding; actin binding; cation binding; metal ion binding; protein binding; zinc ion binding;	K07520	ABLIM; actin-binding LIM protein	hsa04360 Axon guidance - Homo sapiens (human);	IPR001781; IPR003128; IPR032402;	Zinc finger, LIM-type; Villin headpiece; Putative adherens-junction anchoring domain;
O14639	706	S	Actin-binding LIM protein 1	ABLIM1	1	0.000114	84.759	GVS(1)MPNMLEPK	3	-0.21037	6	0.950	0.861	nucleus	cellular component biogenesis; single-multicellular organism process; cellular component organization; lamellipodium organization; visual perception; cilium assembly; single-organism process; cilium organization; neurological system process; anatomical structure morphogenesis; organelle assembly; cellular component assembly; multicellular organism development; cytoskeleton organization; cellular …	cell leading edge; intracellular organelle; cell projection; intracellular non-membrane-bounded organelle; cytoskeletal part; intracellular organelle part; cytoplasm; contractile actin filament bundle; intracellular part; cell; actin cytoskeleton; organelle part; actin filament bundle; non-membrane-bounded organelle; organelle; cytoskeleton; intracellular; cell part; lamellipodium; stress fiber; …	cytoskeletal protein binding; transition metal ion binding; binding; ion binding; actin binding; cation binding; metal ion binding; protein binding; zinc ion binding;	K07520	ABLIM; actin-binding LIM protein	hsa04360 Axon guidance - Homo sapiens (human);	IPR001781; IPR003128; IPR032402;	Zinc finger, LIM-type; Villin headpiece; Putative adherens-junction anchoring domain;
O14639	435	S	Actin-binding LIM protein 1	ABLIM1	0.998256	2.49e-12	131.25	T(0.013)LS(0.315)PT(0.673)PS(0.998)AEGYQDVR	3	0.95342	4	0.551	0.000266	nucleus	cellular component biogenesis; single-multicellular organism process; cellular component organization; lamellipodium organization; visual perception; cilium assembly; single-organism process; cilium organization; neurological system process; anatomical structure morphogenesis; organelle assembly; cellular component assembly; multicellular organism development; cytoskeleton organization; cellular …	cell leading edge; intracellular organelle; cell projection; intracellular non-membrane-bounded organelle; cytoskeletal part; intracellular organelle part; cytoplasm; contractile actin filament bundle; intracellular part; cell; actin cytoskeleton; organelle part; actin filament bundle; non-membrane-bounded organelle; organelle; cytoskeleton; intracellular; cell part; lamellipodium; stress fiber; …	cytoskeletal protein binding; transition metal ion binding; binding; ion binding; actin binding; cation binding; metal ion binding; protein binding; zinc ion binding;	K07520	ABLIM; actin-binding LIM protein	hsa04360 Axon guidance - Homo sapiens (human);	IPR001781; IPR003128; IPR032402;	Zinc finger, LIM-type; Villin headpiece; Putative adherens-junction anchoring domain;
O14639	349	T	Actin-binding LIM protein 1	ABLIM1	0.750685	0.00137	60.093	LRPT(0.751)RT(0.165)S(0.08)S(0.003)ES(0.001)IYSR	3	-0.56038	1	0.714	0.0719	nucleus	cellular component biogenesis; single-multicellular organism process; cellular component organization; lamellipodium organization; visual perception; cilium assembly; single-organism process; cilium organization; neurological system process; anatomical structure morphogenesis; organelle assembly; cellular component assembly; multicellular organism development; cytoskeleton organization; cellular …	cell leading edge; intracellular organelle; cell projection; intracellular non-membrane-bounded organelle; cytoskeletal part; intracellular organelle part; cytoplasm; contractile actin filament bundle; intracellular part; cell; actin cytoskeleton; organelle part; actin filament bundle; non-membrane-bounded organelle; organelle; cytoskeleton; intracellular; cell part; lamellipodium; stress fiber; …	cytoskeletal protein binding; transition metal ion binding; binding; ion binding; actin binding; cation binding; metal ion binding; protein binding; zinc ion binding;	K07520	ABLIM; actin-binding LIM protein	hsa04360 Axon guidance - Homo sapiens (human);	IPR001781; IPR003128; IPR032402;	Zinc finger, LIM-type; Villin headpiece; Putative adherens-junction anchoring domain;
O14639	352	S	Actin-binding LIM protein 1	ABLIM1	0.924967	5.38e-12	131.45	T(0.072)S(0.925)S(0.003)ESIYSR	2	-0.38656	1			nucleus	cellular component biogenesis; single-multicellular organism process; cellular component organization; lamellipodium organization; visual perception; cilium assembly; single-organism process; cilium organization; neurological system process; anatomical structure morphogenesis; organelle assembly; cellular component assembly; multicellular organism development; cytoskeleton organization; cellular …	cell leading edge; intracellular organelle; cell projection; intracellular non-membrane-bounded organelle; cytoskeletal part; intracellular organelle part; cytoplasm; contractile actin filament bundle; intracellular part; cell; actin cytoskeleton; organelle part; actin filament bundle; non-membrane-bounded organelle; organelle; cytoskeleton; intracellular; cell part; lamellipodium; stress fiber; …	cytoskeletal protein binding; transition metal ion binding; binding; ion binding; actin binding; cation binding; metal ion binding; protein binding; zinc ion binding;	K07520	ABLIM; actin-binding LIM protein	hsa04360 Axon guidance - Homo sapiens (human);	IPR001781; IPR003128; IPR032402;	Zinc finger, LIM-type; Villin headpiece; Putative adherens-junction anchoring domain;
O14639	216	S	Actin-binding LIM protein 1	ABLIM1	0.891495	5.11e-05	80.142	DCLCQLCAQPMS(0.003)S(0.105)S(0.891)PK	3	-0.075621	4	0.613	0.0424	nucleus	cellular component biogenesis; single-multicellular organism process; cellular component organization; lamellipodium organization; visual perception; cilium assembly; single-organism process; cilium organization; neurological system process; anatomical structure morphogenesis; organelle assembly; cellular component assembly; multicellular organism development; cytoskeleton organization; cellular …	cell leading edge; intracellular organelle; cell projection; intracellular non-membrane-bounded organelle; cytoskeletal part; intracellular organelle part; cytoplasm; contractile actin filament bundle; intracellular part; cell; actin cytoskeleton; organelle part; actin filament bundle; non-membrane-bounded organelle; organelle; cytoskeleton; intracellular; cell part; lamellipodium; stress fiber; …	cytoskeletal protein binding; transition metal ion binding; binding; ion binding; actin binding; cation binding; metal ion binding; protein binding; zinc ion binding;	K07520	ABLIM; actin-binding LIM protein	hsa04360 Axon guidance - Homo sapiens (human);	IPR001781; IPR003128; IPR032402;	Zinc finger, LIM-type; Villin headpiece; Putative adherens-junction anchoring domain;
O14639	351	T	Actin-binding LIM protein 1	ABLIM1	0.909493	5.38e-12	153.25	T(0.909)S(0.09)SESIYSR	2	0.445	1			nucleus	cellular component biogenesis; single-multicellular organism process; cellular component organization; lamellipodium organization; visual perception; cilium assembly; single-organism process; cilium organization; neurological system process; anatomical structure morphogenesis; organelle assembly; cellular component assembly; multicellular organism development; cytoskeleton organization; cellular …	cell leading edge; intracellular organelle; cell projection; intracellular non-membrane-bounded organelle; cytoskeletal part; intracellular organelle part; cytoplasm; contractile actin filament bundle; intracellular part; cell; actin cytoskeleton; organelle part; actin filament bundle; non-membrane-bounded organelle; organelle; cytoskeleton; intracellular; cell part; lamellipodium; stress fiber; …	cytoskeletal protein binding; transition metal ion binding; binding; ion binding; actin binding; cation binding; metal ion binding; protein binding; zinc ion binding;	K07520	ABLIM; actin-binding LIM protein	hsa04360 Axon guidance - Homo sapiens (human);	IPR001781; IPR003128; IPR032402;	Zinc finger, LIM-type; Villin headpiece; Putative adherens-junction anchoring domain;
O14639	653	T	Actin-binding LIM protein 1	ABLIM1	0.855178	0.00339	87.777	T(0.855)AS(0.14)LPGY(0.004)GR	2	0.045863	4	0.983	0.95	nucleus	cellular component biogenesis; single-multicellular organism process; cellular component organization; lamellipodium organization; visual perception; cilium assembly; single-organism process; cilium organization; neurological system process; anatomical structure morphogenesis; organelle assembly; cellular component assembly; multicellular organism development; cytoskeleton organization; cellular …	cell leading edge; intracellular organelle; cell projection; intracellular non-membrane-bounded organelle; cytoskeletal part; intracellular organelle part; cytoplasm; contractile actin filament bundle; intracellular part; cell; actin cytoskeleton; organelle part; actin filament bundle; non-membrane-bounded organelle; organelle; cytoskeleton; intracellular; cell part; lamellipodium; stress fiber; …	cytoskeletal protein binding; transition metal ion binding; binding; ion binding; actin binding; cation binding; metal ion binding; protein binding; zinc ion binding;	K07520	ABLIM; actin-binding LIM protein	hsa04360 Axon guidance - Homo sapiens (human);	IPR001781; IPR003128; IPR032402;	Zinc finger, LIM-type; Villin headpiece; Putative adherens-junction anchoring domain;
O14646	1689	S	Chromodomain-helicase-DNA-binding protein 1	CHD1	0.995693	0.000133	101.38	S(0.996)PFEHS(0.004)VEHK	3	-0.69261	2			nucleus	regulation of biological quality; nucleic acid-templated transcription; positive regulation by host of viral transcription; positive regulation of biosynthetic process; DNA geometric change; modulation of transcription in other organism involved in symbiotic interaction; biosynthetic process; modification of morphology or physiology of other organism; cellular metabolic process; regulation of RNA…	intracellular organelle; intracellular non-membrane-bounded organelle; intracellular organelle part; cytoplasm; nuclear lumen; nucleolar part; intracellular part; nucleolus; cell; fibrillar center; organelle part; non-membrane-bounded organelle; intracellular membrane-bounded organelle; organelle; membrane-enclosed lumen; nucleus; intracellular organelle lumen; intracellular; cell part; membrane-…	nucleoside phosphate binding; methylated histone binding; ATP-dependent helicase activity; hydrolase activity, acting on acid anhydrides; hydrolase activity; protein binding; ATPase activity; heterocyclic compound binding; organic cyclic compound binding; pyrophosphatase activity; catalytic activity; ribonucleotide binding; binding; ATP-dependent DNA helicase activity; purine ribonucleoside bindi…	K11367			IPR023780; IPR014001; IPR027417; IPR016197; IPR001650; IPR025260; IPR000953; IPR000330;	Chromo domain; Helicase superfamily 1/2, ATP-binding domain; P-loop containing nucleoside triphosphate hydrolase; Chromo domain-like; Helicase, C-terminal; Domain of unknown function DUF4208; Chromo/chromo shadow domain; SNF2-related, N-terminal domain;
O14647	1373	S	Chromodomain-helicase-DNA-binding protein 2	CHD2	1	2.13e-05	70.345	HS(1)DNPS(1)EEGEVKDDGLEK	4	-0.28977	1			nucleus	nucleic acid-templated transcription; cellular developmental process; DNA geometric change; single-organism process; biosynthetic process; cellular metabolic process; regulation of RNA biosynthetic process; metabolic process; macromolecule metabolic process; DNA conformation change; developmental process; hematopoietic progenitor cell differentiation; regulation of gene expression; cellular respo…	intracellular organelle; extracellular region part; intracellular non-membrane-bounded organelle; vesicle; intracellular organelle part; nuclear lumen; intracellular part; nucleolus; cell; extracellular region; organelle part; non-membrane-bounded organelle; extracellular exosome; organelle; intracellular membrane-bounded organelle; membrane-enclosed lumen; nucleoplasm; nucleus; intracellular org…	nucleoside phosphate binding; double-stranded DNA binding; ATP-dependent helicase activity; hydrolase activity, acting on acid anhydrides; hydrolase activity; protein binding; ATPase activity; core promoter binding; regulatory region DNA binding; heterocyclic compound binding; organic cyclic compound binding; core promoter sequence-specific DNA binding; pyrophosphatase activity; catalytic activit…	K20091			IPR027417; IPR025260; IPR000953; IPR000330; IPR023780; IPR016197; IPR014001; IPR001650;	P-loop containing nucleoside triphosphate hydrolase; Domain of unknown function DUF4208; Chromo/chromo shadow domain; SNF2-related, N-terminal domain; Chromo domain; Chromo domain-like; Helicase superfamily 1/2, ATP-binding domain; Helicase, C-terminal;
O14647	1369	S	Chromodomain-helicase-DNA-binding protein 2	CHD2	1	2.13e-05	70.345	HS(1)DNPS(1)EEGEVKDDGLEK	4	-0.28977	1			nucleus	nucleic acid-templated transcription; cellular developmental process; DNA geometric change; single-organism process; biosynthetic process; cellular metabolic process; regulation of RNA biosynthetic process; metabolic process; macromolecule metabolic process; DNA conformation change; developmental process; hematopoietic progenitor cell differentiation; regulation of gene expression; cellular respo…	intracellular organelle; extracellular region part; intracellular non-membrane-bounded organelle; vesicle; intracellular organelle part; nuclear lumen; intracellular part; nucleolus; cell; extracellular region; organelle part; non-membrane-bounded organelle; extracellular exosome; organelle; intracellular membrane-bounded organelle; membrane-enclosed lumen; nucleoplasm; nucleus; intracellular org…	nucleoside phosphate binding; double-stranded DNA binding; ATP-dependent helicase activity; hydrolase activity, acting on acid anhydrides; hydrolase activity; protein binding; ATPase activity; core promoter binding; regulatory region DNA binding; heterocyclic compound binding; organic cyclic compound binding; core promoter sequence-specific DNA binding; pyrophosphatase activity; catalytic activit…	K20091			IPR027417; IPR025260; IPR000953; IPR000330; IPR023780; IPR016197; IPR014001; IPR001650;	P-loop containing nucleoside triphosphate hydrolase; Domain of unknown function DUF4208; Chromo/chromo shadow domain; SNF2-related, N-terminal domain; Chromo domain; Chromo domain-like; Helicase superfamily 1/2, ATP-binding domain; Helicase, C-terminal;
O14647	1807	S	Chromodomain-helicase-DNA-binding protein 2	CHD2	0.999666	0.00331	55.724	SPLDHRS(1)PLER	3	0.031233	3			nucleus	nucleic acid-templated transcription; cellular developmental process; DNA geometric change; single-organism process; biosynthetic process; cellular metabolic process; regulation of RNA biosynthetic process; metabolic process; macromolecule metabolic process; DNA conformation change; developmental process; hematopoietic progenitor cell differentiation; regulation of gene expression; cellular respo…	intracellular organelle; extracellular region part; intracellular non-membrane-bounded organelle; vesicle; intracellular organelle part; nuclear lumen; intracellular part; nucleolus; cell; extracellular region; organelle part; non-membrane-bounded organelle; extracellular exosome; organelle; intracellular membrane-bounded organelle; membrane-enclosed lumen; nucleoplasm; nucleus; intracellular org…	nucleoside phosphate binding; double-stranded DNA binding; ATP-dependent helicase activity; hydrolase activity, acting on acid anhydrides; hydrolase activity; protein binding; ATPase activity; core promoter binding; regulatory region DNA binding; heterocyclic compound binding; organic cyclic compound binding; core promoter sequence-specific DNA binding; pyrophosphatase activity; catalytic activit…	K20091			IPR027417; IPR025260; IPR000953; IPR000330; IPR023780; IPR016197; IPR014001; IPR001650;	P-loop containing nucleoside triphosphate hydrolase; Domain of unknown function DUF4208; Chromo/chromo shadow domain; SNF2-related, N-terminal domain; Chromo domain; Chromo domain-like; Helicase superfamily 1/2, ATP-binding domain; Helicase, C-terminal;
O14681	330	S	Etoposide-induced protein 2.4 homolog	EI24	0.941926	0.00673	52.576	FPS(0.058)PHPS(0.942)PAK	3	-0.24633	2	1.274	0.372	plasma membrane	regulation of cellular process; negative regulation of growth; regulation of growth; single-organism cellular process; single-organism process; negative regulation of cellular process; negative regulation of biological process; autophagy; cellular metabolic process; regulation of cell growth; negative regulation of cell growth; metabolic process; regulation of biological process; cell death; apop…	intracellular organelle; membrane; nuclear outer membrane-endoplasmic reticulum membrane network; endoplasmic reticulum; organelle membrane; nuclear envelope; cytoplasm; intracellular organelle part; organelle envelope; intrinsic component of membrane; endomembrane system; intracellular part; cytosol; cell; integral component of membrane; organelle part; organelle; intracellular membrane-bounded …		K10134	EI24; etoposide-induced 2.4 mRNA	hsa04115 p53 signaling pathway - Homo sapiens (human);
O14681	46	S	Etoposide-induced protein 2.4 homolog	EI24	0.978379	4.56e-05	128.08	RAS(0.978)S(0.022)VLAQR	3	0.035983	6	0.585	0.336	plasma membrane	regulation of cellular process; negative regulation of growth; regulation of growth; single-organism cellular process; single-organism process; negative regulation of cellular process; negative regulation of biological process; autophagy; cellular metabolic process; regulation of cell growth; negative regulation of cell growth; metabolic process; regulation of biological process; cell death; apop…	intracellular organelle; membrane; nuclear outer membrane-endoplasmic reticulum membrane network; endoplasmic reticulum; organelle membrane; nuclear envelope; cytoplasm; intracellular organelle part; organelle envelope; intrinsic component of membrane; endomembrane system; intracellular part; cytosol; cell; integral component of membrane; organelle part; organelle; intracellular membrane-bounded …		K10134	EI24; etoposide-induced 2.4 mRNA	hsa04115 p53 signaling pathway - Homo sapiens (human);
O14681	47	S	Etoposide-induced protein 2.4 homolog	EI24	0.995341	0.00119	117.71	AS(0.005)S(0.995)VLAQR	2	0.10981	1			plasma membrane	regulation of cellular process; negative regulation of growth; regulation of growth; single-organism cellular process; single-organism process; negative regulation of cellular process; negative regulation of biological process; autophagy; cellular metabolic process; regulation of cell growth; negative regulation of cell growth; metabolic process; regulation of biological process; cell death; apop…	intracellular organelle; membrane; nuclear outer membrane-endoplasmic reticulum membrane network; endoplasmic reticulum; organelle membrane; nuclear envelope; cytoplasm; intracellular organelle part; organelle envelope; intrinsic component of membrane; endomembrane system; intracellular part; cytosol; cell; integral component of membrane; organelle part; organelle; intracellular membrane-bounded …		K10134	EI24; etoposide-induced 2.4 mRNA	hsa04115 p53 signaling pathway - Homo sapiens (human);
O14683	14	S	Tumor protein p53-inducible protein 11	TP53I11	0.999921	2.64e-15	170.63	KHS(1)QTDLVSR	3	0.016042	15			plasma membrane	regulation of cellular process; regulation of biological process; regulation of cell proliferation; response to stress; negative regulation of biological process; negative regulation of cellular process; response to stimulus; biological regulation; negative regulation of cell proliferation;	intrinsic component of membrane; membrane; integral component of membrane; membrane part;
O14686	2229	T	Histone-lysine N-methyltransferase 2D	KMT2D	0.824851	3.39e-06	94.564	PGAGQPGEFHT(0.174)T(0.825)PPGT(0.002)PR	3	2.3491	2			nucleus	cellular component biogenesis; reproductive process; nucleic acid-templated transcription; positive regulation of biosynthetic process; cellular metabolic process; protein alkylation; metabolic process; macromolecular complex assembly; single organism reproductive process; beta-catenin-TCF complex assembly; negative regulation of macromolecule biosynthetic process; macromolecule metabolic process…	intracellular organelle; intracellular organelle part; nuclear lumen; macromolecular complex; histone methyltransferase complex; intracellular part; transferase complex; cell; organelle part; methyltransferase complex; membrane-enclosed lumen; intracellular membrane-bounded organelle; organelle; catalytic complex; nucleoplasm; nucleus; intracellular organelle lumen; intracellular; cell part; MLL3…	S-adenosylmethionine-dependent methyltransferase activity; DNA binding; methyltransferase activity; ion binding; protein-lysine N-methyltransferase activity; lysine N-methyltransferase activity; transferase activity, transferring one-carbon groups; protein binding; zinc ion binding; histone-lysine N-methyltransferase activity; regulatory region DNA binding; heterocyclic compound binding; organic …	K09187	MLL2; histone-lysine N-methyltransferase MLL2 [EC:2.1.1.43]	hsa00310 Lysine degradation - Homo sapiens (human);	IPR001214; IPR001841; IPR001965; IPR003889; IPR009071; IPR003616; IPR003888; IPR013083; IPR011011; IPR019787;	SET domain; Zinc finger, RING-type; Zinc finger, PHD-type; FY-rich, C-terminal; High mobility group box domain; Post-SET domain; FY-rich, N-terminal; Zinc finger, RING/FYVE/PHD-type; Zinc finger, FYVE/PHD-type; Zinc finger, PHD-finger;
O14686	4738	S	Histone-lysine N-methyltransferase 2D	KMT2D	1	0.000196	93.348	ALS(1)PVIPLIPR	3	-0.20401	4			nucleus	cellular component biogenesis; reproductive process; nucleic acid-templated transcription; positive regulation of biosynthetic process; cellular metabolic process; protein alkylation; metabolic process; macromolecular complex assembly; single organism reproductive process; beta-catenin-TCF complex assembly; negative regulation of macromolecule biosynthetic process; macromolecule metabolic process…	intracellular organelle; intracellular organelle part; nuclear lumen; macromolecular complex; histone methyltransferase complex; intracellular part; transferase complex; cell; organelle part; methyltransferase complex; membrane-enclosed lumen; intracellular membrane-bounded organelle; organelle; catalytic complex; nucleoplasm; nucleus; intracellular organelle lumen; intracellular; cell part; MLL3…	S-adenosylmethionine-dependent methyltransferase activity; DNA binding; methyltransferase activity; ion binding; protein-lysine N-methyltransferase activity; lysine N-methyltransferase activity; transferase activity, transferring one-carbon groups; protein binding; zinc ion binding; histone-lysine N-methyltransferase activity; regulatory region DNA binding; heterocyclic compound binding; organic …	K09187	MLL2; histone-lysine N-methyltransferase MLL2 [EC:2.1.1.43]	hsa00310 Lysine degradation - Homo sapiens (human);	IPR001214; IPR001841; IPR001965; IPR003889; IPR009071; IPR003616; IPR003888; IPR013083; IPR011011; IPR019787;	SET domain; Zinc finger, RING-type; Zinc finger, PHD-type; FY-rich, C-terminal; High mobility group box domain; Post-SET domain; FY-rich, N-terminal; Zinc finger, RING/FYVE/PHD-type; Zinc finger, FYVE/PHD-type; Zinc finger, PHD-finger;
O14686	1671	S	Histone-lysine N-methyltransferase 2D	KMT2D	1	3.47e-25	143.47	LEGPVS(1)PDVEPGKEETEESK	4	0.30391	3			nucleus	cellular component biogenesis; reproductive process; nucleic acid-templated transcription; positive regulation of biosynthetic process; cellular metabolic process; protein alkylation; metabolic process; macromolecular complex assembly; single organism reproductive process; beta-catenin-TCF complex assembly; negative regulation of macromolecule biosynthetic process; macromolecule metabolic process…	intracellular organelle; intracellular organelle part; nuclear lumen; macromolecular complex; histone methyltransferase complex; intracellular part; transferase complex; cell; organelle part; methyltransferase complex; membrane-enclosed lumen; intracellular membrane-bounded organelle; organelle; catalytic complex; nucleoplasm; nucleus; intracellular organelle lumen; intracellular; cell part; MLL3…	S-adenosylmethionine-dependent methyltransferase activity; DNA binding; methyltransferase activity; ion binding; protein-lysine N-methyltransferase activity; lysine N-methyltransferase activity; transferase activity, transferring one-carbon groups; protein binding; zinc ion binding; histone-lysine N-methyltransferase activity; regulatory region DNA binding; heterocyclic compound binding; organic …	K09187	MLL2; histone-lysine N-methyltransferase MLL2 [EC:2.1.1.43]	hsa00310 Lysine degradation - Homo sapiens (human);	IPR001214; IPR001841; IPR001965; IPR003889; IPR009071; IPR003616; IPR003888; IPR013083; IPR011011; IPR019787;	SET domain; Zinc finger, RING-type; Zinc finger, PHD-type; FY-rich, C-terminal; High mobility group box domain; Post-SET domain; FY-rich, N-terminal; Zinc finger, RING/FYVE/PHD-type; Zinc finger, FYVE/PHD-type; Zinc finger, PHD-finger;
O14686	1606	S	Histone-lysine N-methyltransferase 2D	KMT2D	0.917624	0.019	46.063	NLT(0.082)MS(0.918)PLHK	3	-0.44894	1			nucleus	cellular component biogenesis; reproductive process; nucleic acid-templated transcription; positive regulation of biosynthetic process; cellular metabolic process; protein alkylation; metabolic process; macromolecular complex assembly; single organism reproductive process; beta-catenin-TCF complex assembly; negative regulation of macromolecule biosynthetic process; macromolecule metabolic process…	intracellular organelle; intracellular organelle part; nuclear lumen; macromolecular complex; histone methyltransferase complex; intracellular part; transferase complex; cell; organelle part; methyltransferase complex; membrane-enclosed lumen; intracellular membrane-bounded organelle; organelle; catalytic complex; nucleoplasm; nucleus; intracellular organelle lumen; intracellular; cell part; MLL3…	S-adenosylmethionine-dependent methyltransferase activity; DNA binding; methyltransferase activity; ion binding; protein-lysine N-methyltransferase activity; lysine N-methyltransferase activity; transferase activity, transferring one-carbon groups; protein binding; zinc ion binding; histone-lysine N-methyltransferase activity; regulatory region DNA binding; heterocyclic compound binding; organic …	K09187	MLL2; histone-lysine N-methyltransferase MLL2 [EC:2.1.1.43]	hsa00310 Lysine degradation - Homo sapiens (human);	IPR001214; IPR001841; IPR001965; IPR003889; IPR009071; IPR003616; IPR003888; IPR013083; IPR011011; IPR019787;	SET domain; Zinc finger, RING-type; Zinc finger, PHD-type; FY-rich, C-terminal; High mobility group box domain; Post-SET domain; FY-rich, N-terminal; Zinc finger, RING/FYVE/PHD-type; Zinc finger, FYVE/PHD-type; Zinc finger, PHD-finger;
O14713	41	S	Integrin beta-1-binding protein 1	ITGB1BP1	0.982712	0.00018	74.296	S(0.002)S(0.002)T(0.006)VAS(0.983)LDT(0.007)DSTK	3	1.2363	1			nucleus	cellular component biogenesis; single organism signaling; tube formation; negative regulation of intracellular protein transport; positive regulation of biosynthetic process; negative regulation of protein binding; cellular metabolic process; regulation of endothelial cell migration; regulation of cell migration involved in sprouting angiogenesis; metabolic process; angiogenesis; positive regulat…	membrane; extracellular region part; cell periphery; vesicle; cytoplasm; intracellular part; cell; organelle part; non-membrane-bounded organelle; cytoskeleton; membrane-enclosed lumen; extracellular exosome; nucleoplasm; intracellular organelle lumen; intracellular; cell part; lamellipodium; extracellular vesicle; perinuclear region of cytoplasm; membrane-bounded organelle; organelle lumen; intr…	protein transporter activity; receptor binding; GDP-dissociation inhibitor activity; nucleoside-triphosphatase regulator activity; protein kinase binding; GTPase regulator activity; macromolecular complex binding; substrate-specific transporter activity; protein binding; integrin binding; kinase binding; molecular function regulator; cell adhesion molecule binding; enzyme regulator activity; bind…	K20058			IPR011993; IPR006020;	PH domain-like; PTB/PI domain;
O14737	119	S	Programmed cell death protein 5	PDCD5	0.999937	0.000422	103.08	VMDS(1)DEDDDY	2	-0.55465	3			cytoplasm	regulation of cell death; positive regulation of protein targeting to mitochondrion; positive regulation of cellular protein metabolic process; regulation of release of cytochrome c from mitochondria; regulation of protein targeting; regulation of signaling; cellular response to transforming growth factor beta stimulus; regulation of chaperone-mediated protein folding; single-organism process; ce…	intracellular organelle; extracellular region part; vesicle; cytoplasm; intracellular part; cell; cytosol; extracellular region; intracellular membrane-bounded organelle; organelle; extracellular exosome; nucleus; intracellular; cell part; extracellular vesicle; membrane-bounded organelle; extracellular organelle; cytoplasmic part;	DNA binding; ion binding; tubulin binding; protein binding; beta-tubulin binding; molecular function regulator; heparin binding; sulfur compound binding; heterocyclic compound binding; organic cyclic compound binding; acetyltransferase activator activity; carbohydrate derivative binding; cytoskeletal protein binding; enzyme regulator activity; binding; nucleic acid binding; anion binding; glycosa…	K06875
O14737	125	Y	Programmed cell death protein 5	PDCD5	0.999777	5.65e-05	96.229	KVMDSDEDDDY(1)	2	0.30529	4	0.865	0.264	cytoplasm	regulation of cell death; positive regulation of protein targeting to mitochondrion; positive regulation of cellular protein metabolic process; regulation of release of cytochrome c from mitochondria; regulation of protein targeting; regulation of signaling; cellular response to transforming growth factor beta stimulus; regulation of chaperone-mediated protein folding; single-organism process; ce…	intracellular organelle; extracellular region part; vesicle; cytoplasm; intracellular part; cell; cytosol; extracellular region; intracellular membrane-bounded organelle; organelle; extracellular exosome; nucleus; intracellular; cell part; extracellular vesicle; membrane-bounded organelle; extracellular organelle; cytoplasmic part;	DNA binding; ion binding; tubulin binding; protein binding; beta-tubulin binding; molecular function regulator; heparin binding; sulfur compound binding; heterocyclic compound binding; organic cyclic compound binding; acetyltransferase activator activity; carbohydrate derivative binding; cytoskeletal protein binding; enzyme regulator activity; binding; nucleic acid binding; anion binding; glycosa…	K06875
O14745	280	S	Na(+)/H(+) exchange regulatory cofactor NHE-RF1	SLC9A3R1	1	5.27e-08	108.71	EALAEAALES(1)PRPALVR	3	1.1476	1	0.711	0.443	nucleus	cellular component biogenesis; single organism signaling; regulation of cell death; gland development; cellular trivalent inorganic anion homeostasis; phosphate ion homeostasis; negative regulation of intracellular protein transport; cellular monovalent inorganic anion homeostasis; glutathione transport; hair cell differentiation; epidermal cell differentiation; monocarboxylic acid transport; ren…	membrane; cluster of actin-based cell projections; extracellular region part; apical plasma membrane; brush border; membrane microdomain; cell periphery; vesicle; cytoplasm; sperm flagellum; 9+2 motile cilium; intracellular part; actin-based cell projection; cell; organelle part; non-membrane-bounded organelle; cytoskeleton; extracellular exosome; plasma membrane region; ciliary part; membrane pa…	protein self-association; receptor binding; macromolecular complex binding; growth factor receptor binding; protein binding; beta-2 adrenergic receptor binding; molecular function regulator; PDZ domain binding; dopamine receptor binding; protein complex scaffold; channel regulator activity; binding; adrenergic receptor binding; G-protein coupled receptor binding; protein domain specific binding; …	K13365	SLC9A3R1; Na(+)/H(+) exchange regulatory cofactor NHE-RF1	hsa04530 Tight junction - Homo sapiens (human);	IPR015098; IPR001478;	EBP50, C-terminal; PDZ domain;
O14795	176	S	Protein unc-13 homolog B	UNC13B	0.991809	2.01e-11	70.578	KPLPT(0.001)AAAQCS(0.992)FEDPDS(0.007)AVDDRDSDYR	4	-1.2957	1			nucleus	cellular component biogenesis; regulation of vesicle-mediated transport; single organism signaling; regulation of biological quality; regulation of cell death; glucose homeostasis; neurotransmitter secretion; positive regulation of synaptic vesicle transport; response to glucose; regulation of defense response; neuron-neuron synaptic transmission; dense core granule exocytosis; vesicle-mediated t…	membrane; cytoplasmic vesicle; cell periphery; cell junction; vesicle; cytoplasm; intracellular part; cell; axon terminus; intracellular; cell part; presynapse; neuron projection; endocytic vesicle; neuron projection terminus; membrane-bounded organelle; neuron part; synapse part; intracellular organelle; intracellular vesicle; presynaptic active zone; cell projection; neuromuscular junction; ear…	small GTPase binding; GTP-dependent protein binding; diacylglycerol binding; Ras GTPase binding; binding; ion binding; lipid binding; metal ion binding; cation binding; protein binding; GTPase binding; calmodulin binding; enzyme binding; Rab GTPase binding;	K15293	UNC13A_B_C; protein unc-13 A/B/C	hsa04721 Synaptic vesicle cycle - Homo sapiens (human);	IPR014770; IPR002219; IPR014772; IPR019558; IPR010439; IPR000008;	Munc13 homology 1; Protein kinase C-like, phorbol ester/diacylglycerol-binding domain; Mammalian uncoordinated homology 13, domain 2; Mammalian uncoordinated homology 13, subgroup, domain 2; Calcium-dependent secretion activator domain; C2 domain;
O14828	76	S	Secretory carrier-associated membrane protein 3	SCAMP3	0.963151	0.000427	102.05	KLS(0.963)PT(0.037)EPK	3	-0.10195	4	2.122	0.0527	plasma membrane	response to acid chemical; vesicle-mediated transport; response to oxygen-containing compound; Golgi vesicle transport; organic substance transport; response to organic substance; response to stimulus; protein transport; establishment of localization; transport; establishment of protein localization; response to lipid; response to chemical; response to retinoic acid; protein localization; localiz…	membrane; intracellular organelle; extracellular region part; bounding membrane of organelle; organelle membrane; cytoplasm; intracellular organelle part; vesicle; Golgi membrane; intrinsic component of membrane; endomembrane system; intracellular part; cell; integral component of membrane; extracellular region; organelle part; organelle; extracellular exosome; intracellular membrane-bounded orga…	protein binding; ubiquitin protein ligase binding; ubiquitin-like protein ligase binding; binding; enzyme binding;	K19995
O14874	33	S	[3-methyl-2-oxobutanoate dehydrogenase [lipoamide]] kinase, mitochondrial	BCKDK	0.945497	6.26e-10	123.02	S(0.838)T(0.203)S(0.945)AT(0.011)DT(0.002)HHVEMAR	3	-1.1812	3	0.959	0.759	mitochondria	phosphorylation; cellular protein metabolic process; single-organism process; cellular metabolic process; phosphate-containing compound metabolic process; organic substance metabolic process; metabolic process; cellular amino acid metabolic process; protein phosphorylation; cellular catabolic process; macromolecule metabolic process; protein metabolic process; branched-chain amino acid metabolic …	mitochondrial matrix; intracellular organelle; mitochondrial part; cytoplasm; intracellular organelle part; macromolecular complex; mitochondrial protein complex; intracellular part; cell; mitochondrion; organelle part; dihydrolipoyl dehydrogenase complex; membrane-enclosed lumen; organelle; intracellular membrane-bounded organelle; catalytic complex; intracellular organelle lumen; cell part; int…	ATP binding; nucleoside phosphate binding; phosphotransferase activity, alcohol group as acceptor; [3-methyl-2-oxobutanoate dehydrogenase (acetyl-transferring)] kinase activity; nucleoside binding; ion binding; protein binding; protein kinase activity; nucleotide binding; organic cyclic compound binding; heterocyclic compound binding; ribonucleoside binding; carbohydrate derivative binding; kinas…	K00905			IPR005467; IPR018955; IPR003594; IPR004358;	Histidine kinase domain; Branched-chain alpha-ketoacid dehydrogenase kinase/Pyruvate dehydrogenase kinase, N-terminal; Histidine kinase-like ATPase, C-terminal domain; Signal transduction histidine kinase-related protein, C-terminal;
O14874	31	S	[3-methyl-2-oxobutanoate dehydrogenase [lipoamide]] kinase, mitochondrial	BCKDK	0.995578	3.15e-106	277.87	S(0.996)T(0.004)SATDTHHVEMAR	2	0.14439	55	0.885	0.125	mitochondria	phosphorylation; cellular protein metabolic process; single-organism process; cellular metabolic process; phosphate-containing compound metabolic process; organic substance metabolic process; metabolic process; cellular amino acid metabolic process; protein phosphorylation; cellular catabolic process; macromolecule metabolic process; protein metabolic process; branched-chain amino acid metabolic …	mitochondrial matrix; intracellular organelle; mitochondrial part; cytoplasm; intracellular organelle part; macromolecular complex; mitochondrial protein complex; intracellular part; cell; mitochondrion; organelle part; dihydrolipoyl dehydrogenase complex; membrane-enclosed lumen; organelle; intracellular membrane-bounded organelle; catalytic complex; intracellular organelle lumen; cell part; int…	ATP binding; nucleoside phosphate binding; phosphotransferase activity, alcohol group as acceptor; [3-methyl-2-oxobutanoate dehydrogenase (acetyl-transferring)] kinase activity; nucleoside binding; ion binding; protein binding; protein kinase activity; nucleotide binding; organic cyclic compound binding; heterocyclic compound binding; ribonucleoside binding; carbohydrate derivative binding; kinas…	K00905			IPR005467; IPR018955; IPR003594; IPR004358;	Histidine kinase domain; Branched-chain alpha-ketoacid dehydrogenase kinase/Pyruvate dehydrogenase kinase, N-terminal; Histidine kinase-like ATPase, C-terminal domain; Signal transduction histidine kinase-related protein, C-terminal;
O14908	232	S	PDZ domain-containing protein GIPC1	GIPC1	0.999708	5.47e-14	131.56	SAGGRPGS(1)GPQLGTGR	3	-0.77511	2	0.816	0.352	nucleus	single organism signaling; acid secretion; regulation of biological quality; tissue migration; localization of cell; regulation of signaling; single-organism process; regulation of cell cycle process; protein transport; establishment of localization; protein targeting; positive regulation of transmembrane receptor protein serine/threonine kinase signaling pathway; endothelial cell migration; sign…	dendrite; membrane; extracellular region part; cluster of actin-based cell projections; brush border; cell cortex; organelle membrane; cytoplasmic vesicle; cell periphery; vesicle; cytoplasm; cytoplasmic region; intracellular part; cell; dendritic spine; organelle part; exocytic vesicle; extracellular exosome; neuron spine; synaptic vesicle; presynapse; intracellular; cell part; secretory vesicle…	cell adhesion molecule binding; cytoskeletal protein binding; identical protein binding; receptor binding; protein homodimerization activity; binding; cadherin binding; protein dimerization activity; actin binding; protein binding; protein domain specific binding; myosin binding; PDZ domain binding;	K20056			IPR001478;	PDZ domain;
O14924	850	S	Regulator of G-protein signaling 12	RGS12	0.96077	4.03e-05	83.758	ALPDSQQVPS(0.034)S(0.961)PAS(0.006)K	3	0.011728	1			nucleus	single organism signaling; regulation of cellular process; cellular aromatic compound metabolic process; negative regulation of signal transduction; nucleic acid-templated transcription; regulation of signaling; single-organism process; biosynthetic process; negative regulation of biological process; negative regulation of cellular process; response to stimulus; cellular metabolic process; organi…	membrane; dendrite; cell periphery; cell junction; cytoplasm; intracellular part; cell; organelle part; non-membrane-bounded organelle; condensed chromosome; membrane-enclosed lumen; intracellular organelle lumen; cell part; intracellular; chromosome; neuron projection; membrane-bounded organelle; neuron part; organelle lumen; intracellular organelle; cell projection; intracellular non-membrane-b…	signal transducer activity, downstream of receptor; enzyme regulator activity; binding; nucleoside-triphosphatase regulator activity; GTPase regulator activity; protein binding; molecular function regulator; signal transducer activity; enzyme activator activity; GTPase activator activity;	K16449			IPR024066; IPR016137; IPR003116; IPR011993; IPR029071; IPR001478; IPR006020;	RGS, subdomain 1; RGS domain; Raf-like Ras-binding; PH domain-like; Ubiquitin-related domain; PDZ domain; PTB/PI domain;
O14936	313	S	Peripheral plasma membrane protein CASK	CASK	0.808636	1.83e-05	118.76	GAVLAAVS(0.809)S(0.191)HK	3	-0.29557	1	0.761	0.291	cytoplasm	single organism signaling; GDP metabolic process; regulation of biological quality; nucleoside metabolic process; regulation of keratinocyte proliferation; positive regulation of biosynthetic process; neurotransmitter secretion; ribonucleoside diphosphate metabolic process; cellular metabolic process; negative regulation of cell proliferation; biological adhesion; metabolic process; guanosine-con…	basolateral plasma membrane; ciliary membrane; membrane; extracellular region part; organelle membrane; cell junction; cell periphery; cytoplasm; vesicle; intracellular part; cell-cell junction; cell; extracellular matrix component; presynaptic membrane; organelle part; non-membrane-bounded organelle; basement membrane; cytoskeleton; membrane-enclosed lumen; nuclear lamina; focal adhesion; intrac…	neurexin family protein binding; nucleoside phosphate binding; phosphotransferase activity, alcohol group as acceptor; receptor binding; nucleobase-containing compound kinase activity; protein binding; protein kinase activity; phosphotransferase activity, phosphate group as acceptor; nucleotide kinase activity; heterocyclic compound binding; organic cyclic compound binding; kinase activity; ribon…	K06103			IPR011511; IPR008144; IPR027417; IPR008145; IPR001478; IPR011009; IPR014775; IPR001452; IPR000719; IPR004172;	Variant SH3 domain; Guanylate kinase-like domain; P-loop containing nucleoside triphosphate hydrolase; Guanylate kinase/L-type calcium channel beta subunit; PDZ domain; Protein kinase-like domain; L27 domain, C-terminal; SH3 domain; Protein kinase domain; L27 domain;
O14974	445	S	Protein phosphatase 1 regulatory subunit 12A	PPP1R12A	0.965112	3.87e-07	108.71	T(0.035)GS(0.965)YGALAEITASK	2	-0.78991	1			nucleus	single organism signaling; positive regulation of cellular protein metabolic process; mitotic nuclear division; positive regulation of biosynthetic process; single-organism process; cellular metabolic process; phosphate-containing compound metabolic process; regulation of RNA biosynthetic process; signal transduction; metabolic process; cell communication; positive regulation of metabolic process…	cell junction; myofibril; cytoplasm; macromolecular complex; protein serine/threonine phosphatase complex; supramolecular fiber; intracellular part; Z disc; PTW/PP1 phosphatase complex; supramolecular complex; cell; I band; phosphatase complex; organelle part; chromosomal part; non-membrane-bounded organelle; membrane-enclosed lumen; cytoskeleton; microtubule organizing center; nucleoplasm; catal…	enzyme regulator activity; phosphatase regulator activity; binding; protein kinase binding; 14-3-3 protein binding; protein binding; enzyme inhibitor activity; molecular function regulator; kinase binding; signal transducer activity; enzyme binding;	K06270	PPP1R12A; protein phosphatase 1 regulatory subunit 12A	hsa04611 Platelet activation - Homo sapiens (human); hsa04921 Oxytocin signaling pathway - Homo sapiens (human); hsa04024 cAMP signaling pathway - Homo sapiens (human); hsa05205 Proteoglycans in cancer - Homo sapiens (human); hsa04510 Focal adhesion - Homo sapiens (human); hsa04022 cGMP-PKG signaling pathway - Homo sapiens (human); hsa04810 Regulation of actin cytoskeleton - Homo sapiens (human);…	IPR020683; IPR031775;	Ankyrin repeat-containing domain; cGMP-dependent protein kinase, interacting domain;
O14974	443	T	Protein phosphatase 1 regulatory subunit 12A	PPP1R12A	0.917167	1.68e-14	144.41	T(0.917)GS(0.083)YGALAEITASK	3	-0.30183	1	0.698	0.0608	nucleus	single organism signaling; positive regulation of cellular protein metabolic process; mitotic nuclear division; positive regulation of biosynthetic process; single-organism process; cellular metabolic process; phosphate-containing compound metabolic process; regulation of RNA biosynthetic process; signal transduction; metabolic process; cell communication; positive regulation of metabolic process…	cell junction; myofibril; cytoplasm; macromolecular complex; protein serine/threonine phosphatase complex; supramolecular fiber; intracellular part; Z disc; PTW/PP1 phosphatase complex; supramolecular complex; cell; I band; phosphatase complex; organelle part; chromosomal part; non-membrane-bounded organelle; membrane-enclosed lumen; cytoskeleton; microtubule organizing center; nucleoplasm; catal…	enzyme regulator activity; phosphatase regulator activity; binding; protein kinase binding; 14-3-3 protein binding; protein binding; enzyme inhibitor activity; molecular function regulator; kinase binding; signal transducer activity; enzyme binding;	K06270	PPP1R12A; protein phosphatase 1 regulatory subunit 12A	hsa04611 Platelet activation - Homo sapiens (human); hsa04921 Oxytocin signaling pathway - Homo sapiens (human); hsa04024 cAMP signaling pathway - Homo sapiens (human); hsa05205 Proteoglycans in cancer - Homo sapiens (human); hsa04510 Focal adhesion - Homo sapiens (human); hsa04022 cGMP-PKG signaling pathway - Homo sapiens (human); hsa04810 Regulation of actin cytoskeleton - Homo sapiens (human);…	IPR020683; IPR031775;	Ankyrin repeat-containing domain; cGMP-dependent protein kinase, interacting domain;
O14974	871	S	Protein phosphatase 1 regulatory subunit 12A	PPP1R12A	0.945063	1.3e-18	95.435	STGVSFWTQDS(0.001)DENEQEQQS(0.945)DT(0.054)EEGSNKK	4	0.027268	1	1.058	0.669	nucleus	single organism signaling; positive regulation of cellular protein metabolic process; mitotic nuclear division; positive regulation of biosynthetic process; single-organism process; cellular metabolic process; phosphate-containing compound metabolic process; regulation of RNA biosynthetic process; signal transduction; metabolic process; cell communication; positive regulation of metabolic process…	cell junction; myofibril; cytoplasm; macromolecular complex; protein serine/threonine phosphatase complex; supramolecular fiber; intracellular part; Z disc; PTW/PP1 phosphatase complex; supramolecular complex; cell; I band; phosphatase complex; organelle part; chromosomal part; non-membrane-bounded organelle; membrane-enclosed lumen; cytoskeleton; microtubule organizing center; nucleoplasm; catal…	enzyme regulator activity; phosphatase regulator activity; binding; protein kinase binding; 14-3-3 protein binding; protein binding; enzyme inhibitor activity; molecular function regulator; kinase binding; signal transducer activity; enzyme binding;	K06270	PPP1R12A; protein phosphatase 1 regulatory subunit 12A	hsa04611 Platelet activation - Homo sapiens (human); hsa04921 Oxytocin signaling pathway - Homo sapiens (human); hsa04024 cAMP signaling pathway - Homo sapiens (human); hsa05205 Proteoglycans in cancer - Homo sapiens (human); hsa04510 Focal adhesion - Homo sapiens (human); hsa04022 cGMP-PKG signaling pathway - Homo sapiens (human); hsa04810 Regulation of actin cytoskeleton - Homo sapiens (human);…	IPR020683; IPR031775;	Ankyrin repeat-containing domain; cGMP-dependent protein kinase, interacting domain;
O14974	995	S	Protein phosphatase 1 regulatory subunit 12A	PPP1R12A	1	0.0018	62.088	RIS(1)EMEEELK	3	-0.77323	1	0.514	0.0101	nucleus	single organism signaling; positive regulation of cellular protein metabolic process; mitotic nuclear division; positive regulation of biosynthetic process; single-organism process; cellular metabolic process; phosphate-containing compound metabolic process; regulation of RNA biosynthetic process; signal transduction; metabolic process; cell communication; positive regulation of metabolic process…	cell junction; myofibril; cytoplasm; macromolecular complex; protein serine/threonine phosphatase complex; supramolecular fiber; intracellular part; Z disc; PTW/PP1 phosphatase complex; supramolecular complex; cell; I band; phosphatase complex; organelle part; chromosomal part; non-membrane-bounded organelle; membrane-enclosed lumen; cytoskeleton; microtubule organizing center; nucleoplasm; catal…	enzyme regulator activity; phosphatase regulator activity; binding; protein kinase binding; 14-3-3 protein binding; protein binding; enzyme inhibitor activity; molecular function regulator; kinase binding; signal transducer activity; enzyme binding;	K06270	PPP1R12A; protein phosphatase 1 regulatory subunit 12A	hsa04611 Platelet activation - Homo sapiens (human); hsa04921 Oxytocin signaling pathway - Homo sapiens (human); hsa04024 cAMP signaling pathway - Homo sapiens (human); hsa05205 Proteoglycans in cancer - Homo sapiens (human); hsa04510 Focal adhesion - Homo sapiens (human); hsa04022 cGMP-PKG signaling pathway - Homo sapiens (human); hsa04810 Regulation of actin cytoskeleton - Homo sapiens (human);…	IPR020683; IPR031775;	Ankyrin repeat-containing domain; cGMP-dependent protein kinase, interacting domain;
O14974	507	S	Protein phosphatase 1 regulatory subunit 12A	PPP1R12A	0.891773	8.31e-06	132.32	LAS(0.892)T(0.097)S(0.011)DIEEK	3	-1.9343	2	0.620	0.186	nucleus	single organism signaling; positive regulation of cellular protein metabolic process; mitotic nuclear division; positive regulation of biosynthetic process; single-organism process; cellular metabolic process; phosphate-containing compound metabolic process; regulation of RNA biosynthetic process; signal transduction; metabolic process; cell communication; positive regulation of metabolic process…	cell junction; myofibril; cytoplasm; macromolecular complex; protein serine/threonine phosphatase complex; supramolecular fiber; intracellular part; Z disc; PTW/PP1 phosphatase complex; supramolecular complex; cell; I band; phosphatase complex; organelle part; chromosomal part; non-membrane-bounded organelle; membrane-enclosed lumen; cytoskeleton; microtubule organizing center; nucleoplasm; catal…	enzyme regulator activity; phosphatase regulator activity; binding; protein kinase binding; 14-3-3 protein binding; protein binding; enzyme inhibitor activity; molecular function regulator; kinase binding; signal transducer activity; enzyme binding;	K06270	PPP1R12A; protein phosphatase 1 regulatory subunit 12A	hsa04611 Platelet activation - Homo sapiens (human); hsa04921 Oxytocin signaling pathway - Homo sapiens (human); hsa04024 cAMP signaling pathway - Homo sapiens (human); hsa05205 Proteoglycans in cancer - Homo sapiens (human); hsa04510 Focal adhesion - Homo sapiens (human); hsa04022 cGMP-PKG signaling pathway - Homo sapiens (human); hsa04810 Regulation of actin cytoskeleton - Homo sapiens (human);…	IPR020683; IPR031775;	Ankyrin repeat-containing domain; cGMP-dependent protein kinase, interacting domain;
O14974	299	S	Protein phosphatase 1 regulatory subunit 12A	PPP1R12A	0.99992	2.63e-18	132.36	DKKS(1)PLIESTANMDNNQSQK	4	0.54719	1	0.944	0.772	nucleus	single organism signaling; positive regulation of cellular protein metabolic process; mitotic nuclear division; positive regulation of biosynthetic process; single-organism process; cellular metabolic process; phosphate-containing compound metabolic process; regulation of RNA biosynthetic process; signal transduction; metabolic process; cell communication; positive regulation of metabolic process…	cell junction; myofibril; cytoplasm; macromolecular complex; protein serine/threonine phosphatase complex; supramolecular fiber; intracellular part; Z disc; PTW/PP1 phosphatase complex; supramolecular complex; cell; I band; phosphatase complex; organelle part; chromosomal part; non-membrane-bounded organelle; membrane-enclosed lumen; cytoskeleton; microtubule organizing center; nucleoplasm; catal…	enzyme regulator activity; phosphatase regulator activity; binding; protein kinase binding; 14-3-3 protein binding; protein binding; enzyme inhibitor activity; molecular function regulator; kinase binding; signal transducer activity; enzyme binding;	K06270	PPP1R12A; protein phosphatase 1 regulatory subunit 12A	hsa04611 Platelet activation - Homo sapiens (human); hsa04921 Oxytocin signaling pathway - Homo sapiens (human); hsa04024 cAMP signaling pathway - Homo sapiens (human); hsa05205 Proteoglycans in cancer - Homo sapiens (human); hsa04510 Focal adhesion - Homo sapiens (human); hsa04022 cGMP-PKG signaling pathway - Homo sapiens (human); hsa04810 Regulation of actin cytoskeleton - Homo sapiens (human);…	IPR020683; IPR031775;	Ankyrin repeat-containing domain; cGMP-dependent protein kinase, interacting domain;
O14974	422	S	Protein phosphatase 1 regulatory subunit 12A	PPP1R12A	1	0.0452	42.843	IS(1)PKEEER	3	-0.89353	1			nucleus	single organism signaling; positive regulation of cellular protein metabolic process; mitotic nuclear division; positive regulation of biosynthetic process; single-organism process; cellular metabolic process; phosphate-containing compound metabolic process; regulation of RNA biosynthetic process; signal transduction; metabolic process; cell communication; positive regulation of metabolic process…	cell junction; myofibril; cytoplasm; macromolecular complex; protein serine/threonine phosphatase complex; supramolecular fiber; intracellular part; Z disc; PTW/PP1 phosphatase complex; supramolecular complex; cell; I band; phosphatase complex; organelle part; chromosomal part; non-membrane-bounded organelle; membrane-enclosed lumen; cytoskeleton; microtubule organizing center; nucleoplasm; catal…	enzyme regulator activity; phosphatase regulator activity; binding; protein kinase binding; 14-3-3 protein binding; protein binding; enzyme inhibitor activity; molecular function regulator; kinase binding; signal transducer activity; enzyme binding;	K06270	PPP1R12A; protein phosphatase 1 regulatory subunit 12A	hsa04611 Platelet activation - Homo sapiens (human); hsa04921 Oxytocin signaling pathway - Homo sapiens (human); hsa04024 cAMP signaling pathway - Homo sapiens (human); hsa05205 Proteoglycans in cancer - Homo sapiens (human); hsa04510 Focal adhesion - Homo sapiens (human); hsa04022 cGMP-PKG signaling pathway - Homo sapiens (human); hsa04810 Regulation of actin cytoskeleton - Homo sapiens (human);…	IPR020683; IPR031775;	Ankyrin repeat-containing domain; cGMP-dependent protein kinase, interacting domain;
O14975	577	T	Very long-chain acyl-CoA synthetase	SLC27A2	1	0.000212	77.871	KMT(1)LVEEGFNPAVIK	3	0.93992	1			endoplasmic reticulum	leukocyte activation; organic acid biosynthetic process; single-organism process; biosynthetic process; cellular lipid metabolic process; cellular metabolic process; lipid biosynthetic process; establishment of localization; metabolic process; monocarboxylic acid transport; lipid modification; monocarboxylic acid metabolic process; macromolecule localization; bile acid metabolic process; myeloid …	membrane; nuclear outer membrane-endoplasmic reticulum membrane network; extracellular region part; endoplasmic reticulum; cytoplasmic vesicle; organelle membrane; cell periphery; vesicle; cytoplasm; cytoplasmic vesicle part; intrinsic component of membrane; microbody part; intracellular part; cell; organelle part; peroxisomal membrane; membrane-enclosed lumen; extracellular exosome; intracellula…	nucleoside phosphate binding; receptor binding; ligase activity; lipid transporter activity; substrate-specific transporter activity; protein binding; ligase activity, forming carbon-sulfur bonds; pristanate-CoA ligase activity; heterocyclic compound binding; organic cyclic compound binding; ribonucleotide binding; catalytic activity; binding; purine ribonucleoside binding; fatty acid transporter…	K08746	SLC27A2; solute carrier family 27 (fatty acid transporter), member 2 [EC:6.2.1.- 6.2.1.3]	hsa03320 PPAR signaling pathway - Homo sapiens (human); hsa04146 Peroxisome - Homo sapiens (human); hsa04931 Insulin resistance - Homo sapiens (human);	IPR025110; IPR000873;	AMP-binding enzyme C-terminal domain; AMP-dependent synthetase/ligase;
O14976	73	S	Cyclin-G-associated kinase	GAK	1	0.000878	96.229	LLS(1)NEEEK	2	-0.80909	1	0.838	0.355	plasma membrane	cellular component biogenesis; establishment of protein localization to plasma membrane; cellular metabolic process; vesicle-mediated transport in synapse; 'de novo' protein folding; metabolic process; protein localization to organelle; macromolecule metabolic process; protein metabolic process; protein localization; single-organism transport; nervous system development; synaptic vesicle transpor…	intracellular organelle; membrane; cell junction; cytoplasm; vesicle; anchoring junction; endomembrane system; intracellular part; cytosol; cell; synapse; intracellular membrane-bounded organelle; organelle; focal adhesion; intracellular; cell part; adherens junction; perinuclear region of cytoplasm; cell-substrate junction; Golgi apparatus; membrane-bounded organelle; cytoplasmic part; cell-subs…	ATP binding; nucleoside phosphate binding; phosphotransferase activity, alcohol group as acceptor; chaperone binding; nucleoside binding; ion binding; protein binding; nucleotide binding; protein kinase activity; cyclin binding; organic cyclic compound binding; heterocyclic compound binding; ribonucleoside binding; carbohydrate derivative binding; kinase activity; ribonucleotide binding; catalyti…	K08855			IPR029021; IPR029023; IPR000719; IPR014020; IPR001623; IPR000008; IPR011009;	Protein-tyrosine phosphatase-like; Tensin phosphatase, lipid phosphatase domain; Protein kinase domain; Tensin phosphatase, C2 domain; DnaJ domain; C2 domain; Protein kinase-like domain;
O14979	241	S	Heterogeneous nuclear ribonucleoprotein D-like	HNRNPDL	0.926439	7.12e-05	75.548	VFVGGLS(0.926)PDT(0.072)S(0.002)EEQIK	3	-3.4266	1			nucleus	regulation of cellular process; cellular aromatic compound metabolic process; nucleic acid-templated transcription; regulation of macromolecule metabolic process; regulation of nucleobase-containing compound metabolic process; biosynthetic process; cellular metabolic process; organic substance metabolic process; regulation of RNA biosynthetic process; metabolic process; heterocycle metabolic proc…	intracellular organelle; extracellular region part; vesicle; intracellular organelle part; cytoplasm; nuclear lumen; macromolecular complex; intracellular part; spliceosomal complex; cell; extracellular region; organelle part; membrane-enclosed lumen; extracellular exosome; organelle; intracellular membrane-bounded organelle; nucleoplasm; nucleus; intracellular organelle lumen; intracellular; cel…	poly(A) binding; DNA binding; RNA binding; nucleoside phosphate binding; double-stranded DNA binding; single-stranded DNA binding; protein binding; nucleotide binding; poly-purine tract binding; single-stranded RNA binding; heterocyclic compound binding; organic cyclic compound binding; binding; nucleic acid binding; poly(G) binding; small molecule binding;	K13044			IPR000504; IPR012677;	RNA recognition motif domain; Nucleotide-binding alpha-beta plait domain;
O15014	1055	S	Zinc finger protein 609	ZNF609	0.99742	0.000309	122.18	APS(0.997)LT(0.003)DLVK	2	0.19266	4			nucleus		organelle; intracellular membrane-bounded organelle; intracellular organelle; nucleus; cell part; intracellular; intracellular part; membrane-bounded organelle; cell;	metal ion binding; cation binding; binding; ion binding;				IPR007087;	Zinc finger, C2H2;
O15014	576	S	Zinc finger protein 609	ZNF609	0.999954	2.41e-07	123.76	LVEPHS(1)PSPSSK	3	0.38335	2			nucleus		organelle; intracellular membrane-bounded organelle; intracellular organelle; nucleus; cell part; intracellular; intracellular part; membrane-bounded organelle; cell;	metal ion binding; cation binding; binding; ion binding;				IPR007087;	Zinc finger, C2H2;
O15014	491	S	Zinc finger protein 609	ZNF609	1	1.35e-07	99.407	NCPS(1)PVLIDCPHPNCNK	3	-1.4584	1			nucleus		organelle; intracellular membrane-bounded organelle; intracellular organelle; nucleus; cell part; intracellular; intracellular part; membrane-bounded organelle; cell;	metal ion binding; cation binding; binding; ion binding;				IPR007087;	Zinc finger, C2H2;
O15020	2254	S	Spectrin beta chain, non-erythrocytic 2	SPTBN2	0.999999	0.000681	87.184	RGS(1)LGFYK	3	-0.25488	2	0.432	0.00197	cytoplasm	single organism signaling; cellular component biogenesis; regulation of biological quality; brain development; cellular component morphogenesis; regulation of actin filament length; cellular metabolic process; behavior; response to external stimulus; metabolic process; regulation of cellular component size; positive regulation of molecular function; macromolecule metabolic process; protein metabo…	membrane; extracellular space; extracellular region part; cell cortex; apical plasma membrane; cell junction; cell periphery; cytoplasm; cytoplasmic region; cortical cytoskeleton; neuronal cell body; cortical actin cytoskeleton; intracellular part; cell; organelle part; non-membrane-bounded organelle; cytoskeleton; plasma membrane region; cell part; membrane part; intracellular; spectrin; neuron …	guanyl-nucleotide exchange factor activity; ion binding; protein binding; molecular function regulator; cell adhesion molecule binding; cytoskeletal protein binding; structural constituent of cytoskeleton; binding; cadherin binding; phospholipid binding; lipid binding; actin binding; anion binding; Ras guanyl-nucleotide exchange factor activity; structural molecule activity;	K06115			IPR001605; IPR011993; IPR001715; IPR001849;	Pleckstrin homology domain, spectrin-type; PH domain-like; Calponin homology domain; Pleckstrin homology domain;
O15020	2359	S	Spectrin beta chain, non-erythrocytic 2	SPTBN2	0.999988	6.62e-07	82.267	AMTMPPVS(1)PVGAEGPVVLR	3	-0.20322	1	1.069	0.802	cytoplasm	single organism signaling; cellular component biogenesis; regulation of biological quality; brain development; cellular component morphogenesis; regulation of actin filament length; cellular metabolic process; behavior; response to external stimulus; metabolic process; regulation of cellular component size; positive regulation of molecular function; macromolecule metabolic process; protein metabo…	membrane; extracellular space; extracellular region part; cell cortex; apical plasma membrane; cell junction; cell periphery; cytoplasm; cytoplasmic region; cortical cytoskeleton; neuronal cell body; cortical actin cytoskeleton; intracellular part; cell; organelle part; non-membrane-bounded organelle; cytoskeleton; plasma membrane region; cell part; membrane part; intracellular; spectrin; neuron …	guanyl-nucleotide exchange factor activity; ion binding; protein binding; molecular function regulator; cell adhesion molecule binding; cytoskeletal protein binding; structural constituent of cytoskeleton; binding; cadherin binding; phospholipid binding; lipid binding; actin binding; anion binding; Ras guanyl-nucleotide exchange factor activity; structural molecule activity;	K06115			IPR001605; IPR011993; IPR001715; IPR001849;	Pleckstrin homology domain, spectrin-type; PH domain-like; Calponin homology domain; Pleckstrin homology domain;
O15021	1422	S	Microtubule-associated serine/threonine-protein kinase 4	MAST4	0.999798	0.011	51.727	MHS(1)PPTIVR	3	0.74727	1			cytoplasm	regulation of cellular process; single organism signaling; cellular response to stimulus; phosphorylation; intracellular signal transduction; peptidyl-serine modification; cellular protein metabolic process; single-organism process; primary metabolic process; signaling; response to stimulus; cellular metabolic process; phosphate-containing compound metabolic process; organic substance metabolic p…	intracellular part; cell; cell part; intracellular; cytoplasm;	nucleoside phosphate binding; phosphotransferase activity, alcohol group as acceptor; protein binding; protein kinase activity; organic cyclic compound binding; heterocyclic compound binding; kinase activity; catalytic activity; ribonucleotide binding; binding; purine ribonucleoside binding; cation binding; anion binding; adenyl ribonucleotide binding; adenyl nucleotide binding; transferase activ…	K08789			IPR015022; IPR000719; IPR023142; IPR001478; IPR011009; IPR000961;	Microtubule-associated serine/threonine-protein kinase, domain; Protein kinase domain; Microtubule-associated serine/threonine-protein kinase, pre-PK domain; PDZ domain; Protein kinase-like domain; AGC-kinase, C-terminal;
O15021	1394	S	Microtubule-associated serine/threonine-protein kinase 4	MAST4	0.993561	4.33e-05	96.489	TPSPTPQPT(0.006)S(0.994)PQR	3	1.108	2			cytoplasm	regulation of cellular process; single organism signaling; cellular response to stimulus; phosphorylation; intracellular signal transduction; peptidyl-serine modification; cellular protein metabolic process; single-organism process; primary metabolic process; signaling; response to stimulus; cellular metabolic process; phosphate-containing compound metabolic process; organic substance metabolic p…	intracellular part; cell; cell part; intracellular; cytoplasm;	nucleoside phosphate binding; phosphotransferase activity, alcohol group as acceptor; protein binding; protein kinase activity; organic cyclic compound binding; heterocyclic compound binding; kinase activity; catalytic activity; ribonucleotide binding; binding; purine ribonucleoside binding; cation binding; anion binding; adenyl ribonucleotide binding; adenyl nucleotide binding; transferase activ…	K08789			IPR015022; IPR000719; IPR023142; IPR001478; IPR011009; IPR000961;	Microtubule-associated serine/threonine-protein kinase, domain; Protein kinase domain; Microtubule-associated serine/threonine-protein kinase, pre-PK domain; PDZ domain; Protein kinase-like domain; AGC-kinase, C-terminal;
O15021	1373	S	Microtubule-associated serine/threonine-protein kinase 4	MAST4	0.999829	0.0018	66.289	S(1)AGNIPLSPLAR	2	0.18607	1			cytoplasm	regulation of cellular process; single organism signaling; cellular response to stimulus; phosphorylation; intracellular signal transduction; peptidyl-serine modification; cellular protein metabolic process; single-organism process; primary metabolic process; signaling; response to stimulus; cellular metabolic process; phosphate-containing compound metabolic process; organic substance metabolic p…	intracellular part; cell; cell part; intracellular; cytoplasm;	nucleoside phosphate binding; phosphotransferase activity, alcohol group as acceptor; protein binding; protein kinase activity; organic cyclic compound binding; heterocyclic compound binding; kinase activity; catalytic activity; ribonucleotide binding; binding; purine ribonucleoside binding; cation binding; anion binding; adenyl ribonucleotide binding; adenyl nucleotide binding; transferase activ…	K08789			IPR015022; IPR000719; IPR023142; IPR001478; IPR011009; IPR000961;	Microtubule-associated serine/threonine-protein kinase, domain; Protein kinase domain; Microtubule-associated serine/threonine-protein kinase, pre-PK domain; PDZ domain; Protein kinase-like domain; AGC-kinase, C-terminal;
O15021	1782	S	Microtubule-associated serine/threonine-protein kinase 4	MAST4	1	1.52e-07	95.153	VDSGTEKPGLVAPES(1)PVRK	4	-0.26769	2			cytoplasm	regulation of cellular process; single organism signaling; cellular response to stimulus; phosphorylation; intracellular signal transduction; peptidyl-serine modification; cellular protein metabolic process; single-organism process; primary metabolic process; signaling; response to stimulus; cellular metabolic process; phosphate-containing compound metabolic process; organic substance metabolic p…	intracellular part; cell; cell part; intracellular; cytoplasm;	nucleoside phosphate binding; phosphotransferase activity, alcohol group as acceptor; protein binding; protein kinase activity; organic cyclic compound binding; heterocyclic compound binding; kinase activity; catalytic activity; ribonucleotide binding; binding; purine ribonucleoside binding; cation binding; anion binding; adenyl ribonucleotide binding; adenyl nucleotide binding; transferase activ…	K08789			IPR015022; IPR000719; IPR023142; IPR001478; IPR011009; IPR000961;	Microtubule-associated serine/threonine-protein kinase, domain; Protein kinase domain; Microtubule-associated serine/threonine-protein kinase, pre-PK domain; PDZ domain; Protein kinase-like domain; AGC-kinase, C-terminal;
O15021	917	S	Microtubule-associated serine/threonine-protein kinase 4	MAST4	0.996039	0.000516	99.7	VFS(0.004)S(0.996)IDR	2	-0.11534	1			cytoplasm	regulation of cellular process; single organism signaling; cellular response to stimulus; phosphorylation; intracellular signal transduction; peptidyl-serine modification; cellular protein metabolic process; single-organism process; primary metabolic process; signaling; response to stimulus; cellular metabolic process; phosphate-containing compound metabolic process; organic substance metabolic p…	intracellular part; cell; cell part; intracellular; cytoplasm;	nucleoside phosphate binding; phosphotransferase activity, alcohol group as acceptor; protein binding; protein kinase activity; organic cyclic compound binding; heterocyclic compound binding; kinase activity; catalytic activity; ribonucleotide binding; binding; purine ribonucleoside binding; cation binding; anion binding; adenyl ribonucleotide binding; adenyl nucleotide binding; transferase activ…	K08789			IPR015022; IPR000719; IPR023142; IPR001478; IPR011009; IPR000961;	Microtubule-associated serine/threonine-protein kinase, domain; Protein kinase domain; Microtubule-associated serine/threonine-protein kinase, pre-PK domain; PDZ domain; Protein kinase-like domain; AGC-kinase, C-terminal;
O15021	2523	S	Microtubule-associated serine/threonine-protein kinase 4	MAST4	0.997657	0.000517	128.87	SDS(0.998)LPS(0.002)FR	2	-0.50645	2			cytoplasm	regulation of cellular process; single organism signaling; cellular response to stimulus; phosphorylation; intracellular signal transduction; peptidyl-serine modification; cellular protein metabolic process; single-organism process; primary metabolic process; signaling; response to stimulus; cellular metabolic process; phosphate-containing compound metabolic process; organic substance metabolic p…	intracellular part; cell; cell part; intracellular; cytoplasm;	nucleoside phosphate binding; phosphotransferase activity, alcohol group as acceptor; protein binding; protein kinase activity; organic cyclic compound binding; heterocyclic compound binding; kinase activity; catalytic activity; ribonucleotide binding; binding; purine ribonucleoside binding; cation binding; anion binding; adenyl ribonucleotide binding; adenyl nucleotide binding; transferase activ…	K08789			IPR015022; IPR000719; IPR023142; IPR001478; IPR011009; IPR000961;	Microtubule-associated serine/threonine-protein kinase, domain; Protein kinase domain; Microtubule-associated serine/threonine-protein kinase, pre-PK domain; PDZ domain; Protein kinase-like domain; AGC-kinase, C-terminal;
O15027	1876	T	Protein transport protein Sec16A	SEC16A	0.993646	0.00677	83.775	FANLT(0.994)PS(0.006)R	2	-0.078396	2	0.692	0.0437	nucleus	cellular component biogenesis; organelle localization; cellular component organization; vesicle coating; intracellular transport; single-multicellular organism process; endomembrane system organization; vesicle targeting, rough ER to cis-Golgi; COPII vesicle coating; brain development; Golgi vesicle transport; single-organism process; vesicle targeting; protein transport; establishment of localiz…	intracellular organelle; membrane; nuclear outer membrane-endoplasmic reticulum membrane network; endoplasmic reticulum; bounding membrane of organelle; organelle membrane; intracellular organelle part; cytoplasm; Golgi membrane; endomembrane system; intracellular part; cytosol; cell; organelle part; intracellular membrane-bounded organelle; organelle; endoplasmic reticulum part; membrane part; i…	protein binding; binding;	K20353			IPR024340; IPR024298;	Sec16, central conserved domain; Ancestral coatomer element 1, Sec16/Sec31;
O15027	1169	S	Protein transport protein Sec16A	SEC16A	1	0.000614	78.964	S(1)VHS(1)EHS(1)AR	3	0.17107	12	1.028	0.904	nucleus	cellular component biogenesis; organelle localization; cellular component organization; vesicle coating; intracellular transport; single-multicellular organism process; endomembrane system organization; vesicle targeting, rough ER to cis-Golgi; COPII vesicle coating; brain development; Golgi vesicle transport; single-organism process; vesicle targeting; protein transport; establishment of localiz…	intracellular organelle; membrane; nuclear outer membrane-endoplasmic reticulum membrane network; endoplasmic reticulum; bounding membrane of organelle; organelle membrane; intracellular organelle part; cytoplasm; Golgi membrane; endomembrane system; intracellular part; cytosol; cell; organelle part; intracellular membrane-bounded organelle; organelle; endoplasmic reticulum part; membrane part; i…	protein binding; binding;	K20353			IPR024340; IPR024298;	Sec16, central conserved domain; Ancestral coatomer element 1, Sec16/Sec31;
O15027	391	S	Protein transport protein Sec16A	SEC16A	0.850052	1.06e-36	172.54	QIDS(0.15)S(0.85)PVGGETDETTVSQNYR	3	0.2832	2	1.138	0.417	nucleus	cellular component biogenesis; organelle localization; cellular component organization; vesicle coating; intracellular transport; single-multicellular organism process; endomembrane system organization; vesicle targeting, rough ER to cis-Golgi; COPII vesicle coating; brain development; Golgi vesicle transport; single-organism process; vesicle targeting; protein transport; establishment of localiz…	intracellular organelle; membrane; nuclear outer membrane-endoplasmic reticulum membrane network; endoplasmic reticulum; bounding membrane of organelle; organelle membrane; intracellular organelle part; cytoplasm; Golgi membrane; endomembrane system; intracellular part; cytosol; cell; organelle part; intracellular membrane-bounded organelle; organelle; endoplasmic reticulum part; membrane part; i…	protein binding; binding;	K20353			IPR024340; IPR024298;	Sec16, central conserved domain; Ancestral coatomer element 1, Sec16/Sec31;
O15027	1903	S	Protein transport protein Sec16A	SEC16A	0.999994	7.99e-13	121.1	ADSGPTQPPLS(1)LS(1)PAPETK	3	-0.72054	2	0.684	0.15	nucleus	cellular component biogenesis; organelle localization; cellular component organization; vesicle coating; intracellular transport; single-multicellular organism process; endomembrane system organization; vesicle targeting, rough ER to cis-Golgi; COPII vesicle coating; brain development; Golgi vesicle transport; single-organism process; vesicle targeting; protein transport; establishment of localiz…	intracellular organelle; membrane; nuclear outer membrane-endoplasmic reticulum membrane network; endoplasmic reticulum; bounding membrane of organelle; organelle membrane; intracellular organelle part; cytoplasm; Golgi membrane; endomembrane system; intracellular part; cytosol; cell; organelle part; intracellular membrane-bounded organelle; organelle; endoplasmic reticulum part; membrane part; i…	protein binding; binding;	K20353			IPR024340; IPR024298;	Sec16, central conserved domain; Ancestral coatomer element 1, Sec16/Sec31;
O15027	1895	S	Protein transport protein Sec16A	SEC16A	0.922137	1.06e-05	57.802	ADS(0.922)GPT(0.078)QPPLSLSPAPETK	3	1.6973	1	0.840	0.633	nucleus	cellular component biogenesis; organelle localization; cellular component organization; vesicle coating; intracellular transport; single-multicellular organism process; endomembrane system organization; vesicle targeting, rough ER to cis-Golgi; COPII vesicle coating; brain development; Golgi vesicle transport; single-organism process; vesicle targeting; protein transport; establishment of localiz…	intracellular organelle; membrane; nuclear outer membrane-endoplasmic reticulum membrane network; endoplasmic reticulum; bounding membrane of organelle; organelle membrane; intracellular organelle part; cytoplasm; Golgi membrane; endomembrane system; intracellular part; cytosol; cell; organelle part; intracellular membrane-bounded organelle; organelle; endoplasmic reticulum part; membrane part; i…	protein binding; binding;	K20353			IPR024340; IPR024298;	Sec16, central conserved domain; Ancestral coatomer element 1, Sec16/Sec31;
O15027	1045	S	Protein transport protein Sec16A	SEC16A	0.998064	0.000387	101.38	YPEPERPS(0.002)S(0.998)R	2	-2.0978	5	0.890	0.26	nucleus	cellular component biogenesis; organelle localization; cellular component organization; vesicle coating; intracellular transport; single-multicellular organism process; endomembrane system organization; vesicle targeting, rough ER to cis-Golgi; COPII vesicle coating; brain development; Golgi vesicle transport; single-organism process; vesicle targeting; protein transport; establishment of localiz…	intracellular organelle; membrane; nuclear outer membrane-endoplasmic reticulum membrane network; endoplasmic reticulum; bounding membrane of organelle; organelle membrane; intracellular organelle part; cytoplasm; Golgi membrane; endomembrane system; intracellular part; cytosol; cell; organelle part; intracellular membrane-bounded organelle; organelle; endoplasmic reticulum part; membrane part; i…	protein binding; binding;	K20353			IPR024340; IPR024298;	Sec16, central conserved domain; Ancestral coatomer element 1, Sec16/Sec31;
O15027	1178	S	Protein transport protein Sec16A	SEC16A	0.999856	2.71e-18	169.58	S(1)LHS(0.999)AHS(0.001)LASR	3	-0.28281	11	0.980	0.93	nucleus	cellular component biogenesis; organelle localization; cellular component organization; vesicle coating; intracellular transport; single-multicellular organism process; endomembrane system organization; vesicle targeting, rough ER to cis-Golgi; COPII vesicle coating; brain development; Golgi vesicle transport; single-organism process; vesicle targeting; protein transport; establishment of localiz…	intracellular organelle; membrane; nuclear outer membrane-endoplasmic reticulum membrane network; endoplasmic reticulum; bounding membrane of organelle; organelle membrane; intracellular organelle part; cytoplasm; Golgi membrane; endomembrane system; intracellular part; cytosol; cell; organelle part; intracellular membrane-bounded organelle; organelle; endoplasmic reticulum part; membrane part; i…	protein binding; binding;	K20353			IPR024340; IPR024298;	Sec16, central conserved domain; Ancestral coatomer element 1, Sec16/Sec31;
O15027	891	S	Protein transport protein Sec16A	SEC16A	1	7.3e-09	101.6	AQQELVPPQQQAS(1)PPQLPK	4	-0.04838	6	0.952	0.802	nucleus	cellular component biogenesis; organelle localization; cellular component organization; vesicle coating; intracellular transport; single-multicellular organism process; endomembrane system organization; vesicle targeting, rough ER to cis-Golgi; COPII vesicle coating; brain development; Golgi vesicle transport; single-organism process; vesicle targeting; protein transport; establishment of localiz…	intracellular organelle; membrane; nuclear outer membrane-endoplasmic reticulum membrane network; endoplasmic reticulum; bounding membrane of organelle; organelle membrane; intracellular organelle part; cytoplasm; Golgi membrane; endomembrane system; intracellular part; cytosol; cell; organelle part; intracellular membrane-bounded organelle; organelle; endoplasmic reticulum part; membrane part; i…	protein binding; binding;	K20353			IPR024340; IPR024298;	Sec16, central conserved domain; Ancestral coatomer element 1, Sec16/Sec31;
O15027	1184	S	Protein transport protein Sec16A	SEC16A	0.783688	0.0129	43.764	S(0.038)LHS(0.97)AHS(0.784)LAS(0.209)R	3	-0.13105	1			nucleus	cellular component biogenesis; organelle localization; cellular component organization; vesicle coating; intracellular transport; single-multicellular organism process; endomembrane system organization; vesicle targeting, rough ER to cis-Golgi; COPII vesicle coating; brain development; Golgi vesicle transport; single-organism process; vesicle targeting; protein transport; establishment of localiz…	intracellular organelle; membrane; nuclear outer membrane-endoplasmic reticulum membrane network; endoplasmic reticulum; bounding membrane of organelle; organelle membrane; intracellular organelle part; cytoplasm; Golgi membrane; endomembrane system; intracellular part; cytosol; cell; organelle part; intracellular membrane-bounded organelle; organelle; endoplasmic reticulum part; membrane part; i…	protein binding; binding;	K20353			IPR024340; IPR024298;	Sec16, central conserved domain; Ancestral coatomer element 1, Sec16/Sec31;
O15027	1181	S	Protein transport protein Sec16A	SEC16A	0.999497	1.77e-41	212.78	SLHS(0.999)AHSLASR	3	-0.26205	12	0.978	0.907	nucleus	cellular component biogenesis; organelle localization; cellular component organization; vesicle coating; intracellular transport; single-multicellular organism process; endomembrane system organization; vesicle targeting, rough ER to cis-Golgi; COPII vesicle coating; brain development; Golgi vesicle transport; single-organism process; vesicle targeting; protein transport; establishment of localiz…	intracellular organelle; membrane; nuclear outer membrane-endoplasmic reticulum membrane network; endoplasmic reticulum; bounding membrane of organelle; organelle membrane; intracellular organelle part; cytoplasm; Golgi membrane; endomembrane system; intracellular part; cytosol; cell; organelle part; intracellular membrane-bounded organelle; organelle; endoplasmic reticulum part; membrane part; i…	protein binding; binding;	K20353			IPR024340; IPR024298;	Sec16, central conserved domain; Ancestral coatomer element 1, Sec16/Sec31;
O15027	1149	S	Protein transport protein Sec16A	SEC16A	0.981478	4.98e-51	185.18	FT(0.019)GS(0.981)FDDDPDPHRDPYGEEVDRR	5	-0.073214	10	0.690	0.13	nucleus	cellular component biogenesis; organelle localization; cellular component organization; vesicle coating; intracellular transport; single-multicellular organism process; endomembrane system organization; vesicle targeting, rough ER to cis-Golgi; COPII vesicle coating; brain development; Golgi vesicle transport; single-organism process; vesicle targeting; protein transport; establishment of localiz…	intracellular organelle; membrane; nuclear outer membrane-endoplasmic reticulum membrane network; endoplasmic reticulum; bounding membrane of organelle; organelle membrane; intracellular organelle part; cytoplasm; Golgi membrane; endomembrane system; intracellular part; cytosol; cell; organelle part; intracellular membrane-bounded organelle; organelle; endoplasmic reticulum part; membrane part; i…	protein binding; binding;	K20353			IPR024340; IPR024298;	Sec16, central conserved domain; Ancestral coatomer element 1, Sec16/Sec31;
O15027	1172	S	Protein transport protein Sec16A	SEC16A	1	0.000614	78.964	S(1)VHS(1)EHS(1)AR	3	0.17107	16	1.084	0.745	nucleus	cellular component biogenesis; organelle localization; cellular component organization; vesicle coating; intracellular transport; single-multicellular organism process; endomembrane system organization; vesicle targeting, rough ER to cis-Golgi; COPII vesicle coating; brain development; Golgi vesicle transport; single-organism process; vesicle targeting; protein transport; establishment of localiz…	intracellular organelle; membrane; nuclear outer membrane-endoplasmic reticulum membrane network; endoplasmic reticulum; bounding membrane of organelle; organelle membrane; intracellular organelle part; cytoplasm; Golgi membrane; endomembrane system; intracellular part; cytosol; cell; organelle part; intracellular membrane-bounded organelle; organelle; endoplasmic reticulum part; membrane part; i…	protein binding; binding;	K20353			IPR024340; IPR024298;	Sec16, central conserved domain; Ancestral coatomer element 1, Sec16/Sec31;
O15027	1127	S	Protein transport protein Sec16A	SEC16A	1	1.59e-05	119.62	EHS(1)AFGDRPEK	3	1.2041	2	0.791	0.451	nucleus	cellular component biogenesis; organelle localization; cellular component organization; vesicle coating; intracellular transport; single-multicellular organism process; endomembrane system organization; vesicle targeting, rough ER to cis-Golgi; COPII vesicle coating; brain development; Golgi vesicle transport; single-organism process; vesicle targeting; protein transport; establishment of localiz…	intracellular organelle; membrane; nuclear outer membrane-endoplasmic reticulum membrane network; endoplasmic reticulum; bounding membrane of organelle; organelle membrane; intracellular organelle part; cytoplasm; Golgi membrane; endomembrane system; intracellular part; cytosol; cell; organelle part; intracellular membrane-bounded organelle; organelle; endoplasmic reticulum part; membrane part; i…	protein binding; binding;	K20353			IPR024340; IPR024298;	Sec16, central conserved domain; Ancestral coatomer element 1, Sec16/Sec31;
O15027	1048	S	Protein transport protein Sec16A	SEC16A	0.99436	0.000235	80.96	AS(0.994)HS(0.005)SERPPPR	3	-0.08508	1	0.896	0.542	nucleus	cellular component biogenesis; organelle localization; cellular component organization; vesicle coating; intracellular transport; single-multicellular organism process; endomembrane system organization; vesicle targeting, rough ER to cis-Golgi; COPII vesicle coating; brain development; Golgi vesicle transport; single-organism process; vesicle targeting; protein transport; establishment of localiz…	intracellular organelle; membrane; nuclear outer membrane-endoplasmic reticulum membrane network; endoplasmic reticulum; bounding membrane of organelle; organelle membrane; intracellular organelle part; cytoplasm; Golgi membrane; endomembrane system; intracellular part; cytosol; cell; organelle part; intracellular membrane-bounded organelle; organelle; endoplasmic reticulum part; membrane part; i…	protein binding; binding;	K20353			IPR024340; IPR024298;	Sec16, central conserved domain; Ancestral coatomer element 1, Sec16/Sec31;
O15027	1905	S	Protein transport protein Sec16A	SEC16A	0.999702	6.27e-25	143.48	ADSGPTQPPLS(1)LS(1)PAPETK	3	-0.72054	14	0.850	0.585	nucleus	cellular component biogenesis; organelle localization; cellular component organization; vesicle coating; intracellular transport; single-multicellular organism process; endomembrane system organization; vesicle targeting, rough ER to cis-Golgi; COPII vesicle coating; brain development; Golgi vesicle transport; single-organism process; vesicle targeting; protein transport; establishment of localiz…	intracellular organelle; membrane; nuclear outer membrane-endoplasmic reticulum membrane network; endoplasmic reticulum; bounding membrane of organelle; organelle membrane; intracellular organelle part; cytoplasm; Golgi membrane; endomembrane system; intracellular part; cytosol; cell; organelle part; intracellular membrane-bounded organelle; organelle; endoplasmic reticulum part; membrane part; i…	protein binding; binding;	K20353			IPR024340; IPR024298;	Sec16, central conserved domain; Ancestral coatomer element 1, Sec16/Sec31;
O15027	1786	S	Protein transport protein Sec16A	SEC16A	0.999985	9.3e-07	81.65	LLPSAPQTLPDGPLAS(1)PAR	3	-0.30284	2	0.876	0.547	nucleus	cellular component biogenesis; organelle localization; cellular component organization; vesicle coating; intracellular transport; single-multicellular organism process; endomembrane system organization; vesicle targeting, rough ER to cis-Golgi; COPII vesicle coating; brain development; Golgi vesicle transport; single-organism process; vesicle targeting; protein transport; establishment of localiz…	intracellular organelle; membrane; nuclear outer membrane-endoplasmic reticulum membrane network; endoplasmic reticulum; bounding membrane of organelle; organelle membrane; intracellular organelle part; cytoplasm; Golgi membrane; endomembrane system; intracellular part; cytosol; cell; organelle part; intracellular membrane-bounded organelle; organelle; endoplasmic reticulum part; membrane part; i…	protein binding; binding;	K20353			IPR024340; IPR024298;	Sec16, central conserved domain; Ancestral coatomer element 1, Sec16/Sec31;
O15027	1175	S	Protein transport protein Sec16A	SEC16A	1	0.000316	91.469	S(1)VHS(1)EHS(1)AR	3	0.17107	13	1.168	0.523	nucleus	cellular component biogenesis; organelle localization; cellular component organization; vesicle coating; intracellular transport; single-multicellular organism process; endomembrane system organization; vesicle targeting, rough ER to cis-Golgi; COPII vesicle coating; brain development; Golgi vesicle transport; single-organism process; vesicle targeting; protein transport; establishment of localiz…	intracellular organelle; membrane; nuclear outer membrane-endoplasmic reticulum membrane network; endoplasmic reticulum; bounding membrane of organelle; organelle membrane; intracellular organelle part; cytoplasm; Golgi membrane; endomembrane system; intracellular part; cytosol; cell; organelle part; intracellular membrane-bounded organelle; organelle; endoplasmic reticulum part; membrane part; i…	protein binding; binding;	K20353			IPR024340; IPR024298;	Sec16, central conserved domain; Ancestral coatomer element 1, Sec16/Sec31;
O15033	337	S	Apoptosis-resistant E3 ubiquitin protein ligase 1	AREL1	0.962517	9.79e-16	123.35	RPSTAVDEEDEDS(0.963)PS(0.037)ECHTPEK	4	-0.4321	1			nucleus	regulation of cellular process; proteolysis involved in cellular protein catabolic process; regulation of cell death; cellular protein catabolic process; negative regulation of programmed cell death; regulation of programmed cell death; cellular protein metabolic process; single-organism process; negative regulation of biological process; negative regulation of cellular process; cellular metaboli…	cell part; intracellular; cytoplasm; intracellular part; cell; cytosol; cytoplasmic part;	ubiquitin-like protein transferase activity; catalytic activity; transferase activity; ubiquitin-protein transferase activity;				IPR013783; IPR014756; IPR000569;	Immunoglobulin-like fold; Immunoglobulin E-set; HECT domain;
O15042	67	S	U2 snRNP-associated SURP motif-containing protein	U2SURP	1	4.94e-18	160.03	ESLCDS(1)PHQNLSR	3	-0.38984	5	0.922	0.599	nucleus	RNA processing; cellular aromatic compound metabolic process; organic cyclic compound metabolic process; nitrogen compound metabolic process; primary metabolic process; cellular metabolic process; organic substance metabolic process; mRNA processing; RNA metabolic process; mRNA splicing, via spliceosome; metabolic process; RNA splicing, via transesterification reactions with bulged adenosine as n…	intracellular organelle; intracellular organelle part; nuclear lumen; intracellular part; cell; organelle part; organelle; intracellular membrane-bounded organelle; membrane-enclosed lumen; nucleoplasm; nucleus; intracellular organelle lumen; cell part; intracellular; membrane-bounded organelle; organelle lumen; nuclear part;	organic cyclic compound binding; heterocyclic compound binding; RNA binding; nucleoside phosphate binding; binding; nucleic acid binding; protein binding; nucleotide binding; small molecule binding;	K12842	SR140; U2-associated protein SR140	hsa03040 Spliceosome - Homo sapiens (human);	IPR000061; IPR006569; IPR000504; IPR012677; IPR013170; IPR008942;	SWAP/Surp; CID domain; RNA recognition motif domain; Nucleotide-binding alpha-beta plait domain; mRNA splicing factor Cwf21 domain; ENTH/VHS;
O15055	627	S	Period circadian protein homolog 2	PER2	0.962863	4.91e-16	128.66	AT(0.037)VS(0.963)PGPHAGEAEPPSR	3	0.13304	1			nucleus	regulation of biological quality; regulation of L-glutamate transport; nucleic acid-templated transcription; posttranscriptional regulation of gene expression; regulation of insulin secretion; cellular lipid metabolic process; cellular metabolic process; cellular polysaccharide metabolic process; negative regulation of cell proliferation; glucose metabolic process; metabolic process; gluconeogene…	intracellular organelle; intracellular non-membrane-bounded organelle; intracellular organelle part; cytoplasm; nuclear lumen; intracellular part; nucleolus; cell; organelle part; non-membrane-bounded organelle; membrane-enclosed lumen; intracellular membrane-bounded organelle; organelle; nucleus; intracellular organelle lumen; intracellular; cell part; perinuclear region of cytoplasm; membrane-b…	DNA binding; transcription regulatory region sequence-specific DNA binding; double-stranded DNA binding; sequence-specific double-stranded DNA binding; protein binding; transcription cofactor activity; sequence-specific DNA binding; ubiquitin-like protein binding; heterocyclic compound binding; regulatory region DNA binding; organic cyclic compound binding; regulatory region nucleic acid binding;…	K02633	PER; period circadian protein	hsa04710 Circadian rhythm - Homo sapiens (human); hsa05168 Herpes simplex infection - Homo sapiens (human); hsa04713 Circadian entrainment - Homo sapiens (human); hsa05202 Transcriptional misregulation in cancer - Homo sapiens (human);	IPR013655; IPR000014; IPR022728;	PAS fold-3; PAS domain; Period circadian-like, C-terminal;
O15055	977	S	Period circadian protein homolog 2	PER2	0.999778	0.00823	63.691	AS(1)PPLFQSR	2	0.53424	2			nucleus	regulation of biological quality; regulation of L-glutamate transport; nucleic acid-templated transcription; posttranscriptional regulation of gene expression; regulation of insulin secretion; cellular lipid metabolic process; cellular metabolic process; cellular polysaccharide metabolic process; negative regulation of cell proliferation; glucose metabolic process; metabolic process; gluconeogene…	intracellular organelle; intracellular non-membrane-bounded organelle; intracellular organelle part; cytoplasm; nuclear lumen; intracellular part; nucleolus; cell; organelle part; non-membrane-bounded organelle; membrane-enclosed lumen; intracellular membrane-bounded organelle; organelle; nucleus; intracellular organelle lumen; intracellular; cell part; perinuclear region of cytoplasm; membrane-b…	DNA binding; transcription regulatory region sequence-specific DNA binding; double-stranded DNA binding; sequence-specific double-stranded DNA binding; protein binding; transcription cofactor activity; sequence-specific DNA binding; ubiquitin-like protein binding; heterocyclic compound binding; regulatory region DNA binding; organic cyclic compound binding; regulatory region nucleic acid binding;…	K02633	PER; period circadian protein	hsa04710 Circadian rhythm - Homo sapiens (human); hsa05168 Herpes simplex infection - Homo sapiens (human); hsa04713 Circadian entrainment - Homo sapiens (human); hsa05202 Transcriptional misregulation in cancer - Homo sapiens (human);	IPR013655; IPR000014; IPR022728;	PAS fold-3; PAS domain; Period circadian-like, C-terminal;
O15056	1191	S	Synaptojanin-2	SYNJ2	0.999076	1.31e-09	124.46	GGAS(0.999)EEALS(0.001)AVAPR	2	-0.80115	2			plasma membrane	cellular component organization; glycerolipid metabolic process; phosphatidylinositol biosynthetic process; phospholipid biosynthetic process; single-organism process; biosynthetic process; cellular lipid metabolic process; cellular metabolic process; phosphate-containing compound metabolic process; organic substance metabolic process; lipid biosynthetic process; metabolic process; lipid modifica…	intracellular organelle; membrane; cell projection; intracellular non-membrane-bounded organelle; membrane microdomain; cell periphery; cytoplasm; intracellular part; cell; cytosol; plasma membrane; non-membrane-bounded organelle; organelle; cytoskeleton; axon; membrane part; cell part; intracellular; whole membrane; membrane region; neuron projection; membrane raft; neuron part; cytoplasmic part;	RNA binding; nucleoside phosphate binding; phosphatidylinositol-3-phosphatase activity; phosphatidylinositol-3,5-bisphosphate 3-phosphatase activity; phosphatase activity; protein binding; phosphatidylinositol phosphate phosphatase activity; hydrolase activity; nucleotide binding; phosphatidylinositol phosphate 5-phosphatase activity; phosphatidylinositol phosphate 4-phosphatase activity; heteroc…	K20279	SYNJ; synaptojanin [EC:3.1.3.36]	hsa00562 Inositol phosphate metabolism - Homo sapiens (human); hsa01100 Metabolic pathways - Homo sapiens (human); hsa04070 Phosphatidylinositol signaling system - Homo sapiens (human);	IPR000300; IPR000504; IPR012677; IPR005135; IPR002013; IPR015047;	Inositol polyphosphate-related phosphatase; RNA recognition motif domain; Nucleotide-binding alpha-beta plait domain; Endonuclease/exonuclease/phosphatase; SAC domain; Domain of unknown function DUF1866;
O15061	598	T	Synemin	SYNM	0.995636	0.0016	53.625	GLQT(0.996)PVKDAGGGT(0.004)GR	3	1.2139	1			nucleus	single-multicellular organism process; cellular component organization; muscle system process; system process; intermediate filament cytoskeleton organization; intermediate filament-based process; multicellular organismal movement; single-organism cellular process; striated muscle contraction; single-organism process; multicellular organismal process; voluntary skeletal muscle contraction; skelet…	membrane; cell periphery; cell junction; myofibril; cytoplasm; supramolecular fiber; intracellular part; supramolecular complex; cell; organelle part; non-membrane-bounded organelle; cytoskeleton; intracellular; cell part; adherens junction; contractile fiber; neuron part; intracellular organelle; polymeric cytoskeletal fiber; intracellular non-membrane-bounded organelle; cytoskeletal part; intra…	cytoskeletal protein binding; intermediate filament binding; structural constituent of cytoskeleton; vinculin binding; binding; macromolecular complex binding; protein binding; structural molecule activity; structural constituent of muscle; protein complex binding;	K10376
O15061	429	S	Synemin	SYNM	0.759207	0.000409	101.71	T(0.06)FS(0.759)PT(0.181)YGLLR	2	0.4908	1			nucleus	single-multicellular organism process; cellular component organization; muscle system process; system process; intermediate filament cytoskeleton organization; intermediate filament-based process; multicellular organismal movement; single-organism cellular process; striated muscle contraction; single-organism process; multicellular organismal process; voluntary skeletal muscle contraction; skelet…	membrane; cell periphery; cell junction; myofibril; cytoplasm; supramolecular fiber; intracellular part; supramolecular complex; cell; organelle part; non-membrane-bounded organelle; cytoskeleton; intracellular; cell part; adherens junction; contractile fiber; neuron part; intracellular organelle; polymeric cytoskeletal fiber; intracellular non-membrane-bounded organelle; cytoskeletal part; intra…	cytoskeletal protein binding; intermediate filament binding; structural constituent of cytoskeleton; vinculin binding; binding; macromolecular complex binding; protein binding; structural molecule activity; structural constituent of muscle; protein complex binding;	K10376
O15061	653	S	Synemin	SYNM	0.75962	0.000317	48.374	QFT(0.113)QS(0.76)PET(0.115)EAS(0.012)ADS(0.001)FPDTK	3	1.5627	1			nucleus	single-multicellular organism process; cellular component organization; muscle system process; system process; intermediate filament cytoskeleton organization; intermediate filament-based process; multicellular organismal movement; single-organism cellular process; striated muscle contraction; single-organism process; multicellular organismal process; voluntary skeletal muscle contraction; skelet…	membrane; cell periphery; cell junction; myofibril; cytoplasm; supramolecular fiber; intracellular part; supramolecular complex; cell; organelle part; non-membrane-bounded organelle; cytoskeleton; intracellular; cell part; adherens junction; contractile fiber; neuron part; intracellular organelle; polymeric cytoskeletal fiber; intracellular non-membrane-bounded organelle; cytoskeletal part; intra…	cytoskeletal protein binding; intermediate filament binding; structural constituent of cytoskeleton; vinculin binding; binding; macromolecular complex binding; protein binding; structural molecule activity; structural constituent of muscle; protein complex binding;	K10376
O15063	673	S	Uncharacterized protein KIAA0355	KIAA0355	0.999232	1.14e-07	112.67	HNS(0.999)AAT(0.001)AMVTEQK	3	-1.5901	2			nucleus							IPR031813;	Domain of unknown function DUF4745;
O15068	620	S	Guanine nucleotide exchange factor DBS	MCF2L	0.999965	5.02e-07	107.65	GS(1)AGEEEESLAILR	2	0.36362	1			nucleus	regulation of cellular process; single organism signaling; regulation of cell death; regulation of signaling; positive regulation of intracellular signal transduction; regulation of programmed cell death; positive regulation of apoptotic process; single-organism process; regulation of Ras protein signal transduction; response to stimulus; signal transduction; regulation of cell communication; cel…	membrane; extracellular space; extracellular region part; extrinsic component of membrane; cell periphery; cytoplasm; extrinsic component of plasma membrane; endomembrane system; intracellular part; cytosol; extrinsic component of cytoplasmic side of plasma membrane; cell; cytoplasmic side of plasma membrane; cytoplasmic side of membrane; extracellular region; plasma membrane; plasma membrane par…	guanyl-nucleotide exchange factor activity; binding; phosphatidylinositol binding; phospholipid binding; ion binding; lipid binding; Ras guanyl-nucleotide exchange factor activity; protein binding; anion binding; molecular function regulator; Rho guanyl-nucleotide exchange factor activity;	K20685			IPR001251; IPR011511; IPR001452; IPR011993; IPR000219; IPR001849;	CRAL-TRIO lipid binding domain; Variant SH3 domain; SH3 domain; PH domain-like; Dbl homology (DH) domain; Pleckstrin homology domain;
O15085	35	S	Rho guanine nucleotide exchange factor 11	ARHGEF11	0.999337	2.53e-12	126.42	QPS(0.999)DAS(0.001)ETTGLVQR	3	2.2845	3			nucleus	single organism signaling; muscle system process; regulation of cell death; regulation of signaling; positive regulation of biosynthetic process; single-organism process; regulation of cell growth; regulation of RNA biosynthetic process; actin cytoskeleton organization; signal transduction; regulation of cell communication; cell communication; positive regulation of metabolic process; positive re…	membrane; cell part; intracellular; cytoplasm; intracellular part; cell; cytosol; cytoplasmic part;	enzyme regulator activity; receptor binding; guanyl-nucleotide exchange factor activity; nucleoside-triphosphatase regulator activity; binding; GTPase regulator activity; Ras guanyl-nucleotide exchange factor activity; protein binding; G-protein coupled receptor binding; molecular function regulator; enzyme activator activity; Rho guanyl-nucleotide exchange factor activity; GTPase activator activ…	K12331	ARHGEF11; Rho guanine nucleotide exchange factor 11	hsa05200 Pathways in cancer - Homo sapiens (human); hsa04270 Vascular smooth muscle contraction - Homo sapiens (human);	IPR016137; IPR015212; IPR011993; IPR001478; IPR000219; IPR001849;	RGS domain; Regulator of G protein signalling-like domain; PH domain-like; PDZ domain; Dbl homology (DH) domain; Pleckstrin homology domain;
O15085	1462	T	Rho guanine nucleotide exchange factor 11	ARHGEF11	0.945154	1.29e-10	97.124	SLGGESSGGT(0.054)T(0.945)PVGS(0.001)FHTEAAR	3	0.4422	3			nucleus	single organism signaling; muscle system process; regulation of cell death; regulation of signaling; positive regulation of biosynthetic process; single-organism process; regulation of cell growth; regulation of RNA biosynthetic process; actin cytoskeleton organization; signal transduction; regulation of cell communication; cell communication; positive regulation of metabolic process; positive re…	membrane; cell part; intracellular; cytoplasm; intracellular part; cell; cytosol; cytoplasmic part;	enzyme regulator activity; receptor binding; guanyl-nucleotide exchange factor activity; nucleoside-triphosphatase regulator activity; binding; GTPase regulator activity; Ras guanyl-nucleotide exchange factor activity; protein binding; G-protein coupled receptor binding; molecular function regulator; enzyme activator activity; Rho guanyl-nucleotide exchange factor activity; GTPase activator activ…	K12331	ARHGEF11; Rho guanine nucleotide exchange factor 11	hsa05200 Pathways in cancer - Homo sapiens (human); hsa04270 Vascular smooth muscle contraction - Homo sapiens (human);	IPR016137; IPR015212; IPR011993; IPR001478; IPR000219; IPR001849;	RGS domain; Regulator of G protein signalling-like domain; PH domain-like; PDZ domain; Dbl homology (DH) domain; Pleckstrin homology domain;
O15085	1413	S	Rho guanine nucleotide exchange factor 11	ARHGEF11	0.999535	0.00657	72.365	S(1)PPSLALR	2	0.84736	2			nucleus	single organism signaling; muscle system process; regulation of cell death; regulation of signaling; positive regulation of biosynthetic process; single-organism process; regulation of cell growth; regulation of RNA biosynthetic process; actin cytoskeleton organization; signal transduction; regulation of cell communication; cell communication; positive regulation of metabolic process; positive re…	membrane; cell part; intracellular; cytoplasm; intracellular part; cell; cytosol; cytoplasmic part;	enzyme regulator activity; receptor binding; guanyl-nucleotide exchange factor activity; nucleoside-triphosphatase regulator activity; binding; GTPase regulator activity; Ras guanyl-nucleotide exchange factor activity; protein binding; G-protein coupled receptor binding; molecular function regulator; enzyme activator activity; Rho guanyl-nucleotide exchange factor activity; GTPase activator activ…	K12331	ARHGEF11; Rho guanine nucleotide exchange factor 11	hsa05200 Pathways in cancer - Homo sapiens (human); hsa04270 Vascular smooth muscle contraction - Homo sapiens (human);	IPR016137; IPR015212; IPR011993; IPR001478; IPR000219; IPR001849;	RGS domain; Regulator of G protein signalling-like domain; PH domain-like; PDZ domain; Dbl homology (DH) domain; Pleckstrin homology domain;
O15085	614	S	Rho guanine nucleotide exchange factor 11	ARHGEF11	0.998952	0.0276	63.216	S(0.001)ES(0.999)LKGR	2	0.06913	1			nucleus	single organism signaling; muscle system process; regulation of cell death; regulation of signaling; positive regulation of biosynthetic process; single-organism process; regulation of cell growth; regulation of RNA biosynthetic process; actin cytoskeleton organization; signal transduction; regulation of cell communication; cell communication; positive regulation of metabolic process; positive re…	membrane; cell part; intracellular; cytoplasm; intracellular part; cell; cytosol; cytoplasmic part;	enzyme regulator activity; receptor binding; guanyl-nucleotide exchange factor activity; nucleoside-triphosphatase regulator activity; binding; GTPase regulator activity; Ras guanyl-nucleotide exchange factor activity; protein binding; G-protein coupled receptor binding; molecular function regulator; enzyme activator activity; Rho guanyl-nucleotide exchange factor activity; GTPase activator activ…	K12331	ARHGEF11; Rho guanine nucleotide exchange factor 11	hsa05200 Pathways in cancer - Homo sapiens (human); hsa04270 Vascular smooth muscle contraction - Homo sapiens (human);	IPR016137; IPR015212; IPR011993; IPR001478; IPR000219; IPR001849;	RGS domain; Regulator of G protein signalling-like domain; PH domain-like; PDZ domain; Dbl homology (DH) domain; Pleckstrin homology domain;
O15085	668	T	Rho guanine nucleotide exchange factor 11	ARHGEF11	0.999996	1.58e-05	105.19	SLENPT(1)PPFTPK	3	-0.72445	4			nucleus	single organism signaling; muscle system process; regulation of cell death; regulation of signaling; positive regulation of biosynthetic process; single-organism process; regulation of cell growth; regulation of RNA biosynthetic process; actin cytoskeleton organization; signal transduction; regulation of cell communication; cell communication; positive regulation of metabolic process; positive re…	membrane; cell part; intracellular; cytoplasm; intracellular part; cell; cytosol; cytoplasmic part;	enzyme regulator activity; receptor binding; guanyl-nucleotide exchange factor activity; nucleoside-triphosphatase regulator activity; binding; GTPase regulator activity; Ras guanyl-nucleotide exchange factor activity; protein binding; G-protein coupled receptor binding; molecular function regulator; enzyme activator activity; Rho guanyl-nucleotide exchange factor activity; GTPase activator activ…	K12331	ARHGEF11; Rho guanine nucleotide exchange factor 11	hsa05200 Pathways in cancer - Homo sapiens (human); hsa04270 Vascular smooth muscle contraction - Homo sapiens (human);	IPR016137; IPR015212; IPR011993; IPR001478; IPR000219; IPR001849;	RGS domain; Regulator of G protein signalling-like domain; PH domain-like; PDZ domain; Dbl homology (DH) domain; Pleckstrin homology domain;
O15085	1295	S	Rho guanine nucleotide exchange factor 11	ARHGEF11	0.989676	3.36e-07	126.01	NS(0.99)GIWES(0.01)PELDR	2	-0.74985	1			nucleus	single organism signaling; muscle system process; regulation of cell death; regulation of signaling; positive regulation of biosynthetic process; single-organism process; regulation of cell growth; regulation of RNA biosynthetic process; actin cytoskeleton organization; signal transduction; regulation of cell communication; cell communication; positive regulation of metabolic process; positive re…	membrane; cell part; intracellular; cytoplasm; intracellular part; cell; cytosol; cytoplasmic part;	enzyme regulator activity; receptor binding; guanyl-nucleotide exchange factor activity; nucleoside-triphosphatase regulator activity; binding; GTPase regulator activity; Ras guanyl-nucleotide exchange factor activity; protein binding; G-protein coupled receptor binding; molecular function regulator; enzyme activator activity; Rho guanyl-nucleotide exchange factor activity; GTPase activator activ…	K12331	ARHGEF11; Rho guanine nucleotide exchange factor 11	hsa05200 Pathways in cancer - Homo sapiens (human); hsa04270 Vascular smooth muscle contraction - Homo sapiens (human);	IPR016137; IPR015212; IPR011993; IPR001478; IPR000219; IPR001849;	RGS domain; Regulator of G protein signalling-like domain; PH domain-like; PDZ domain; Dbl homology (DH) domain; Pleckstrin homology domain;
O15085	254	T	Rho guanine nucleotide exchange factor 11	ARHGEF11	0.824058	0.00302	96.618	T(0.824)S(0.176)PVIMAR	2	-1.0084	4			nucleus	single organism signaling; muscle system process; regulation of cell death; regulation of signaling; positive regulation of biosynthetic process; single-organism process; regulation of cell growth; regulation of RNA biosynthetic process; actin cytoskeleton organization; signal transduction; regulation of cell communication; cell communication; positive regulation of metabolic process; positive re…	membrane; cell part; intracellular; cytoplasm; intracellular part; cell; cytosol; cytoplasmic part;	enzyme regulator activity; receptor binding; guanyl-nucleotide exchange factor activity; nucleoside-triphosphatase regulator activity; binding; GTPase regulator activity; Ras guanyl-nucleotide exchange factor activity; protein binding; G-protein coupled receptor binding; molecular function regulator; enzyme activator activity; Rho guanyl-nucleotide exchange factor activity; GTPase activator activ…	K12331	ARHGEF11; Rho guanine nucleotide exchange factor 11	hsa05200 Pathways in cancer - Homo sapiens (human); hsa04270 Vascular smooth muscle contraction - Homo sapiens (human);	IPR016137; IPR015212; IPR011993; IPR001478; IPR000219; IPR001849;	RGS domain; Regulator of G protein signalling-like domain; PH domain-like; PDZ domain; Dbl homology (DH) domain; Pleckstrin homology domain;
O15085	635	S	Rho guanine nucleotide exchange factor 11	ARHGEF11	0.961449	1.24e-08	114.87	S(0.039)RS(0.961)DVDMDAAAEATR	2	-0.24043	4			nucleus	single organism signaling; muscle system process; regulation of cell death; regulation of signaling; positive regulation of biosynthetic process; single-organism process; regulation of cell growth; regulation of RNA biosynthetic process; actin cytoskeleton organization; signal transduction; regulation of cell communication; cell communication; positive regulation of metabolic process; positive re…	membrane; cell part; intracellular; cytoplasm; intracellular part; cell; cytosol; cytoplasmic part;	enzyme regulator activity; receptor binding; guanyl-nucleotide exchange factor activity; nucleoside-triphosphatase regulator activity; binding; GTPase regulator activity; Ras guanyl-nucleotide exchange factor activity; protein binding; G-protein coupled receptor binding; molecular function regulator; enzyme activator activity; Rho guanyl-nucleotide exchange factor activity; GTPase activator activ…	K12331	ARHGEF11; Rho guanine nucleotide exchange factor 11	hsa05200 Pathways in cancer - Homo sapiens (human); hsa04270 Vascular smooth muscle contraction - Homo sapiens (human);	IPR016137; IPR015212; IPR011993; IPR001478; IPR000219; IPR001849;	RGS domain; Regulator of G protein signalling-like domain; PH domain-like; PDZ domain; Dbl homology (DH) domain; Pleckstrin homology domain;
O15085	633	S	Rho guanine nucleotide exchange factor 11	ARHGEF11	0.844423	9.55e-15	141.05	S(0.844)RS(0.156)DVDMDAAAEATR	3	-0.9087	3			nucleus	single organism signaling; muscle system process; regulation of cell death; regulation of signaling; positive regulation of biosynthetic process; single-organism process; regulation of cell growth; regulation of RNA biosynthetic process; actin cytoskeleton organization; signal transduction; regulation of cell communication; cell communication; positive regulation of metabolic process; positive re…	membrane; cell part; intracellular; cytoplasm; intracellular part; cell; cytosol; cytoplasmic part;	enzyme regulator activity; receptor binding; guanyl-nucleotide exchange factor activity; nucleoside-triphosphatase regulator activity; binding; GTPase regulator activity; Ras guanyl-nucleotide exchange factor activity; protein binding; G-protein coupled receptor binding; molecular function regulator; enzyme activator activity; Rho guanyl-nucleotide exchange factor activity; GTPase activator activ…	K12331	ARHGEF11; Rho guanine nucleotide exchange factor 11	hsa05200 Pathways in cancer - Homo sapiens (human); hsa04270 Vascular smooth muscle contraction - Homo sapiens (human);	IPR016137; IPR015212; IPR011993; IPR001478; IPR000219; IPR001849;	RGS domain; Regulator of G protein signalling-like domain; PH domain-like; PDZ domain; Dbl homology (DH) domain; Pleckstrin homology domain;
O15085	1480	S	Rho guanine nucleotide exchange factor 11	ARHGEF11	0.977936	8.26e-07	88.504	WT(0.002)DGS(0.02)LS(0.978)PPAKEPLASDSR	3	-0.61597	1			nucleus	single organism signaling; muscle system process; regulation of cell death; regulation of signaling; positive regulation of biosynthetic process; single-organism process; regulation of cell growth; regulation of RNA biosynthetic process; actin cytoskeleton organization; signal transduction; regulation of cell communication; cell communication; positive regulation of metabolic process; positive re…	membrane; cell part; intracellular; cytoplasm; intracellular part; cell; cytosol; cytoplasmic part;	enzyme regulator activity; receptor binding; guanyl-nucleotide exchange factor activity; nucleoside-triphosphatase regulator activity; binding; GTPase regulator activity; Ras guanyl-nucleotide exchange factor activity; protein binding; G-protein coupled receptor binding; molecular function regulator; enzyme activator activity; Rho guanyl-nucleotide exchange factor activity; GTPase activator activ…	K12331	ARHGEF11; Rho guanine nucleotide exchange factor 11	hsa05200 Pathways in cancer - Homo sapiens (human); hsa04270 Vascular smooth muscle contraction - Homo sapiens (human);	IPR016137; IPR015212; IPR011993; IPR001478; IPR000219; IPR001849;	RGS domain; Regulator of G protein signalling-like domain; PH domain-like; PDZ domain; Dbl homology (DH) domain; Pleckstrin homology domain;
O15085	255	S	Rho guanine nucleotide exchange factor 11	ARHGEF11	0.761859	0.0104	64.191	T(0.238)S(0.762)PVIMAR	2	0.27515	3			nucleus	single organism signaling; muscle system process; regulation of cell death; regulation of signaling; positive regulation of biosynthetic process; single-organism process; regulation of cell growth; regulation of RNA biosynthetic process; actin cytoskeleton organization; signal transduction; regulation of cell communication; cell communication; positive regulation of metabolic process; positive re…	membrane; cell part; intracellular; cytoplasm; intracellular part; cell; cytosol; cytoplasmic part;	enzyme regulator activity; receptor binding; guanyl-nucleotide exchange factor activity; nucleoside-triphosphatase regulator activity; binding; GTPase regulator activity; Ras guanyl-nucleotide exchange factor activity; protein binding; G-protein coupled receptor binding; molecular function regulator; enzyme activator activity; Rho guanyl-nucleotide exchange factor activity; GTPase activator activ…	K12331	ARHGEF11; Rho guanine nucleotide exchange factor 11	hsa05200 Pathways in cancer - Homo sapiens (human); hsa04270 Vascular smooth muscle contraction - Homo sapiens (human);	IPR016137; IPR015212; IPR011993; IPR001478; IPR000219; IPR001849;	RGS domain; Regulator of G protein signalling-like domain; PH domain-like; PDZ domain; Dbl homology (DH) domain; Pleckstrin homology domain;
O15117	558	S	FYN-binding protein	FYB	0.998449	0.00198	113.71	GS(0.998)Y(0.001)GY(0.001)IK	2	0.55703	1			nucleus	single organism signaling; endomembrane system organization; NLS-bearing protein import into nucleus; establishment of protein localization to organelle; cell surface receptor signaling pathway; protein import; single-organism process; nuclear transport; cellular metabolic process; phosphate-containing compound metabolic process; protein transport; establishment of localization; protein targeting…	membrane; intracellular organelle; intracellular non-membrane-bounded organelle; cell periphery; cell junction; cytoplasm; intracellular part; cell; cytosol; actin cytoskeleton; plasma membrane; non-membrane-bounded organelle; intracellular membrane-bounded organelle; cytoskeleton; organelle; nucleus; intracellular; cell part; membrane-bounded organelle; cytoplasmic part;	protein binding; receptor binding; binding; protein complex binding; macromolecular complex binding;	K17698	FYB; FYN binding protein	hsa04015 Rap1 signaling pathway - Homo sapiens (human);	IPR011511; IPR001452; IPR029294;	Variant SH3 domain; SH3 domain; Helically-extended SH3 domain;
O15119	456	S	T-box transcription factor TBX3	TBX3	1	0.00196	58.079	GLGAEERRS(1)PVR	3	-0.20648	1			nucleus	single organism signaling; regulation of cell death; gland development; reproductive process; chordate embryonic development; segmentation; positive regulation of biosynthetic process; mammary gland formation; cellular metabolic process; branching morphogenesis of an epithelial tube; metabolic process; outflow tract morphogenesis; embryo development; cardiac muscle cell development; regulation of…	organelle; intracellular membrane-bounded organelle; intracellular organelle; nucleus; cell part; intracellular; intracellular part; membrane-bounded organelle; cell;	RNA polymerase II transcription factor activity, sequence-specific DNA binding; DNA binding; transcription regulatory region sequence-specific DNA binding; double-stranded DNA binding; sequence-specific double-stranded DNA binding; RNA polymerase II regulatory region DNA binding; protein binding; sequence-specific DNA binding; core promoter proximal region sequence-specific DNA binding; RNA polym…	K10177	TBX3; T-box protein 3	hsa04550 Signaling pathways regulating pluripotency of stem cells - Homo sapiens (human);	IPR008967; IPR022582;	p53-like transcription factor, DNA-binding; Transcription factor, T-box, region of unknown function;
O15119	707	S	T-box transcription factor TBX3	TBX3	0.978149	0.000123	77.13	SSTLSS(0.001)S(0.003)S(0.006)MS(0.012)LS(0.978)PK	3	-0.034695	1			nucleus	single organism signaling; regulation of cell death; gland development; reproductive process; chordate embryonic development; segmentation; positive regulation of biosynthetic process; mammary gland formation; cellular metabolic process; branching morphogenesis of an epithelial tube; metabolic process; outflow tract morphogenesis; embryo development; cardiac muscle cell development; regulation of…	organelle; intracellular membrane-bounded organelle; intracellular organelle; nucleus; cell part; intracellular; intracellular part; membrane-bounded organelle; cell;	RNA polymerase II transcription factor activity, sequence-specific DNA binding; DNA binding; transcription regulatory region sequence-specific DNA binding; double-stranded DNA binding; sequence-specific double-stranded DNA binding; RNA polymerase II regulatory region DNA binding; protein binding; sequence-specific DNA binding; core promoter proximal region sequence-specific DNA binding; RNA polym…	K10177	TBX3; T-box protein 3	hsa04550 Signaling pathways regulating pluripotency of stem cells - Homo sapiens (human);	IPR008967; IPR022582;	p53-like transcription factor, DNA-binding; Transcription factor, T-box, region of unknown function;
O15119	432	S	T-box transcription factor TBX3	TBX3	0.987158	0.000135	51.321	LDKAS(0.987)PDS(0.082)RHS(0.656)PAT(0.071)IS(0.051)S(0.056)S(0.051)T(0.046)R	4	-0.21435	1			nucleus	single organism signaling; regulation of cell death; gland development; reproductive process; chordate embryonic development; segmentation; positive regulation of biosynthetic process; mammary gland formation; cellular metabolic process; branching morphogenesis of an epithelial tube; metabolic process; outflow tract morphogenesis; embryo development; cardiac muscle cell development; regulation of…	organelle; intracellular membrane-bounded organelle; intracellular organelle; nucleus; cell part; intracellular; intracellular part; membrane-bounded organelle; cell;	RNA polymerase II transcription factor activity, sequence-specific DNA binding; DNA binding; transcription regulatory region sequence-specific DNA binding; double-stranded DNA binding; sequence-specific double-stranded DNA binding; RNA polymerase II regulatory region DNA binding; protein binding; sequence-specific DNA binding; core promoter proximal region sequence-specific DNA binding; RNA polym…	K10177	TBX3; T-box protein 3	hsa04550 Signaling pathways regulating pluripotency of stem cells - Homo sapiens (human);	IPR008967; IPR022582;	p53-like transcription factor, DNA-binding; Transcription factor, T-box, region of unknown function;
O15119	438	S	T-box transcription factor TBX3	TBX3	0.977253	2.96e-05	84.166	ASPDS(0.02)RHS(0.977)PAT(0.001)ISSSTR	3	-1.0602	6			nucleus	single organism signaling; regulation of cell death; gland development; reproductive process; chordate embryonic development; segmentation; positive regulation of biosynthetic process; mammary gland formation; cellular metabolic process; branching morphogenesis of an epithelial tube; metabolic process; outflow tract morphogenesis; embryo development; cardiac muscle cell development; regulation of…	organelle; intracellular membrane-bounded organelle; intracellular organelle; nucleus; cell part; intracellular; intracellular part; membrane-bounded organelle; cell;	RNA polymerase II transcription factor activity, sequence-specific DNA binding; DNA binding; transcription regulatory region sequence-specific DNA binding; double-stranded DNA binding; sequence-specific double-stranded DNA binding; RNA polymerase II regulatory region DNA binding; protein binding; sequence-specific DNA binding; core promoter proximal region sequence-specific DNA binding; RNA polym…	K10177	TBX3; T-box protein 3	hsa04550 Signaling pathways regulating pluripotency of stem cells - Homo sapiens (human);	IPR008967; IPR022582;	p53-like transcription factor, DNA-binding; Transcription factor, T-box, region of unknown function;
O15127	320	S	Secretory carrier-associated membrane protein 2	SCAMP2	0.919768	7.57e-14	141.06	AAS(0.08)S(0.92)AAQGAFQGN	2	-1.1195	6	0.810	0.043	plasma membrane	establishment of protein localization; transport; vesicle-mediated transport; Golgi vesicle transport; organic substance transport; protein localization; macromolecule localization; localization; post-Golgi vesicle-mediated transport; protein transport; establishment of localization;	membrane; extracellular region part; organelle membrane; cytoplasmic vesicle; cytoplasm; vesicle; cytoplasmic vesicle part; intrinsic component of membrane; trans-Golgi network membrane; recycling endosome membrane; intracellular part; cell; organelle part; recycling endosome; extracellular exosome; membrane part; intracellular; cell part; whole membrane; Golgi subcompartment; extracellular vesic…	protein binding; binding;	K19995
O15143	310	S	Actin-related protein 2/3 complex subunit 1B	ARPC1B	0.757768	1.99e-09	108.44	KAS(0.758)S(0.181)EGGT(0.062)AAGAGLDSLHK	4	-0.0050139	1	0.661	0.0543	cytoplasm	single organism signaling; regulation of actin filament polymerization; Arp2/3 complex-mediated actin nucleation; regulation of biological quality; positive regulation of protein polymerization; cell surface receptor signaling pathway; response to estrogen; Fc-gamma receptor signaling pathway; single-organism process; regulation of actin filament length; establishment of localization; phagocytosi…	extracellular region part; cell junction; vesicle; cytoplasm; macromolecular complex; intracellular part; cell; organelle part; non-membrane-bounded organelle; cytoskeleton; extracellular exosome; Arp2/3 protein complex; focal adhesion; intracellular; cell part; adherens junction; extracellular vesicle; tubulobulbar complex; cell-substrate junction; membrane-bounded organelle; cell-substrate adhe…	cytoskeletal protein binding; structural constituent of cytoskeleton; binding; macromolecular complex binding; actin binding; protein binding; structural molecule activity; protein complex binding;	K05757	ARPC1A_B; actin related protein 2/3 complex, subunit 1A/1B	hsa05100 Bacterial invasion of epithelial cells - Homo sapiens (human); hsa05132 Salmonella infection - Homo sapiens (human); hsa04666 Fc gamma R-mediated phagocytosis - Homo sapiens (human); hsa04144 Endocytosis - Homo sapiens (human); hsa05130 Pathogenic Escherichia coli infection - Homo sapiens (human); hsa05131 Shigellosis - Homo sapiens (human); hsa04810 Regulation of actin cytoskeleton - Ho…	IPR017986; IPR015943;	WD40-repeat-containing domain; WD40/YVTN repeat-like-containing domain;
O15164	811	S	Transcription intermediary factor 1-alpha	TRIM24	0.988309	4.01e-08	102.16	SEWLDPS(0.012)QKS(0.988)PLHVGETR	4	-0.17079	1			nucleus	regulation of cell death; regulation of biological quality; nucleic acid-templated transcription; positive regulation of biosynthetic process; peptidyl-tyrosine modification; regulation of response to extracellular stimulus; cellular metabolic process; negative regulation of cell proliferation; metabolic process; metal ion homeostasis; macromolecule metabolic process; protein metabolic process; n…	cytoplasm; intracellular part; cell; organelle part; chromosomal part; non-membrane-bounded organelle; membrane-enclosed lumen; nucleoplasm; intracellular organelle lumen; nuclear chromosome part; intracellular; cell part; chromosome; nuclear chromatin; membrane-bounded organelle; organelle lumen; intracellular organelle; euchromatin; intracellular non-membrane-bounded organelle; intracellular or…	phosphotransferase activity, alcohol group as acceptor; receptor binding; protein tyrosine kinase activity; protein binding; chromatin binding; protein kinase activity; organic cyclic compound binding; regulatory region DNA binding; heterocyclic compound binding; ubiquitin protein ligase activity; kinase activity; catalytic activity; estrogen response element binding; binding; lysine-acetylated h…	K08881			IPR003649; IPR001841; IPR001965; IPR001487; IPR000315; IPR013083; IPR011011; IPR019787;	B-box, C-terminal; Zinc finger, RING-type; Zinc finger, PHD-type; Bromodomain; B-box-type zinc finger; Zinc finger, RING/FYVE/PHD-type; Zinc finger, FYVE/PHD-type; Zinc finger, PHD-finger;
O15164	1028	S	Transcription intermediary factor 1-alpha	TRIM24	0.999998	1.36e-09	109.25	NESEDNKFS(1)DDS(1)DDDFVQPR	3	-0.40042	4			nucleus	regulation of cell death; regulation of biological quality; nucleic acid-templated transcription; positive regulation of biosynthetic process; peptidyl-tyrosine modification; regulation of response to extracellular stimulus; cellular metabolic process; negative regulation of cell proliferation; metabolic process; metal ion homeostasis; macromolecule metabolic process; protein metabolic process; n…	cytoplasm; intracellular part; cell; organelle part; chromosomal part; non-membrane-bounded organelle; membrane-enclosed lumen; nucleoplasm; intracellular organelle lumen; nuclear chromosome part; intracellular; cell part; chromosome; nuclear chromatin; membrane-bounded organelle; organelle lumen; intracellular organelle; euchromatin; intracellular non-membrane-bounded organelle; intracellular or…	phosphotransferase activity, alcohol group as acceptor; receptor binding; protein tyrosine kinase activity; protein binding; chromatin binding; protein kinase activity; organic cyclic compound binding; regulatory region DNA binding; heterocyclic compound binding; ubiquitin protein ligase activity; kinase activity; catalytic activity; estrogen response element binding; binding; lysine-acetylated h…	K08881			IPR003649; IPR001841; IPR001965; IPR001487; IPR000315; IPR013083; IPR011011; IPR019787;	B-box, C-terminal; Zinc finger, RING-type; Zinc finger, PHD-type; Bromodomain; B-box-type zinc finger; Zinc finger, RING/FYVE/PHD-type; Zinc finger, FYVE/PHD-type; Zinc finger, PHD-finger;
O15164	1025	S	Transcription intermediary factor 1-alpha	TRIM24	0.999723	1.36e-09	109.25	NESEDNKFS(1)DDS(1)DDDFVQPR	3	-0.40042	3			nucleus	regulation of cell death; regulation of biological quality; nucleic acid-templated transcription; positive regulation of biosynthetic process; peptidyl-tyrosine modification; regulation of response to extracellular stimulus; cellular metabolic process; negative regulation of cell proliferation; metabolic process; metal ion homeostasis; macromolecule metabolic process; protein metabolic process; n…	cytoplasm; intracellular part; cell; organelle part; chromosomal part; non-membrane-bounded organelle; membrane-enclosed lumen; nucleoplasm; intracellular organelle lumen; nuclear chromosome part; intracellular; cell part; chromosome; nuclear chromatin; membrane-bounded organelle; organelle lumen; intracellular organelle; euchromatin; intracellular non-membrane-bounded organelle; intracellular or…	phosphotransferase activity, alcohol group as acceptor; receptor binding; protein tyrosine kinase activity; protein binding; chromatin binding; protein kinase activity; organic cyclic compound binding; regulatory region DNA binding; heterocyclic compound binding; ubiquitin protein ligase activity; kinase activity; catalytic activity; estrogen response element binding; binding; lysine-acetylated h…	K08881			IPR003649; IPR001841; IPR001965; IPR001487; IPR000315; IPR013083; IPR011011; IPR019787;	B-box, C-terminal; Zinc finger, RING-type; Zinc finger, PHD-type; Bromodomain; B-box-type zinc finger; Zinc finger, RING/FYVE/PHD-type; Zinc finger, FYVE/PHD-type; Zinc finger, PHD-finger;
O15164	1042	S	Transcription intermediary factor 1-alpha	TRIM24	1	0.00454	74.841	LKS(1)IEER	3	0.73345	1			nucleus	regulation of cell death; regulation of biological quality; nucleic acid-templated transcription; positive regulation of biosynthetic process; peptidyl-tyrosine modification; regulation of response to extracellular stimulus; cellular metabolic process; negative regulation of cell proliferation; metabolic process; metal ion homeostasis; macromolecule metabolic process; protein metabolic process; n…	cytoplasm; intracellular part; cell; organelle part; chromosomal part; non-membrane-bounded organelle; membrane-enclosed lumen; nucleoplasm; intracellular organelle lumen; nuclear chromosome part; intracellular; cell part; chromosome; nuclear chromatin; membrane-bounded organelle; organelle lumen; intracellular organelle; euchromatin; intracellular non-membrane-bounded organelle; intracellular or…	phosphotransferase activity, alcohol group as acceptor; receptor binding; protein tyrosine kinase activity; protein binding; chromatin binding; protein kinase activity; organic cyclic compound binding; regulatory region DNA binding; heterocyclic compound binding; ubiquitin protein ligase activity; kinase activity; catalytic activity; estrogen response element binding; binding; lysine-acetylated h…	K08881			IPR003649; IPR001841; IPR001965; IPR001487; IPR000315; IPR013083; IPR011011; IPR019787;	B-box, C-terminal; Zinc finger, RING-type; Zinc finger, PHD-type; Bromodomain; B-box-type zinc finger; Zinc finger, RING/FYVE/PHD-type; Zinc finger, FYVE/PHD-type; Zinc finger, PHD-finger;
O15173	104	S	Membrane-associated progesterone receptor component 2	PGRMC2	1	1.04e-10	164.9	RDFS(1)LEQLR	3	-0.28152	11	1.021	0.951	cytoplasm	regulation of cellular process; single organism signaling; cellular response to stimulus; response to organic cyclic compound; cellular response to organic substance; single-organism process; cellular response to organic cyclic compound; response to organic substance; response to stimulus; signaling; cellular response to steroid hormone stimulus; hormone-mediated signaling pathway; cellular respo…	intracellular organelle; membrane; nuclear envelope; organelle envelope; intracellular organelle part; intrinsic component of membrane; endomembrane system; intracellular part; cell; integral component of membrane; organelle part; intracellular membrane-bounded organelle; organelle; nucleus; membrane part; intracellular; cell part; envelope; membrane-bounded organelle; nuclear part;	organic cyclic compound binding; heterocyclic compound binding; steroid hormone receptor activity; signaling receptor activity; heme binding; molecular transducer activity; receptor activity; binding; lipid binding; protein binding; tetrapyrrole binding; signal transducer activity; steroid binding;	K17278			IPR001199;	Cytochrome b5-like heme/steroid binding domain;
O15173	211	T	Membrane-associated progesterone receptor component 2	PGRMC2	0.999998	9.05e-51	183.49	LLKPGEEPSEYT(1)DEEDTKDHNK	5	0.60077	22	1.158	0.7	cytoplasm	regulation of cellular process; single organism signaling; cellular response to stimulus; response to organic cyclic compound; cellular response to organic substance; single-organism process; cellular response to organic cyclic compound; response to organic substance; response to stimulus; signaling; cellular response to steroid hormone stimulus; hormone-mediated signaling pathway; cellular respo…	intracellular organelle; membrane; nuclear envelope; organelle envelope; intracellular organelle part; intrinsic component of membrane; endomembrane system; intracellular part; cell; integral component of membrane; organelle part; intracellular membrane-bounded organelle; organelle; nucleus; membrane part; intracellular; cell part; envelope; membrane-bounded organelle; nuclear part;	organic cyclic compound binding; heterocyclic compound binding; steroid hormone receptor activity; signaling receptor activity; heme binding; molecular transducer activity; receptor activity; binding; lipid binding; protein binding; tetrapyrrole binding; signal transducer activity; steroid binding;	K17278			IPR001199;	Cytochrome b5-like heme/steroid binding domain;
O15231	453	S	Zinc finger protein 185	ZNF185	0.864084	2.11e-06	116	QS(0.129)S(0.864)PS(0.006)GS(0.001)EQLVR	2	1.002	1			cytoplasm,nucleus		intracellular organelle; intracellular non-membrane-bounded organelle; cell junction; cytoplasm; anchoring junction; intracellular part; cell; non-membrane-bounded organelle; organelle; cytoskeleton; focal adhesion; intracellular; cell part; adherens junction; cell-substrate junction; cell-substrate adherens junction;	metal ion binding; cation binding; zinc ion binding; transition metal ion binding; binding; ion binding;				IPR001781;	Zinc finger, LIM-type;
O15234	148	S	Protein CASC3	CASC3	0.966396	1.68e-06	62.032	S(0.006)T(0.006)VT(0.017)GERQS(0.966)GDGQES(0.003)T(0.001)EPVENK	3	0.96149	1			nucleus	RNA transport; posttranscriptional regulation of gene expression; nucleic acid-templated transcription; biosynthetic process; nuclear export; nuclear transport; cellular metabolic process; protein transport; establishment of localization; DNA-templated transcription, termination; mRNA-containing ribonucleoprotein complex export from nucleus; metabolic process; establishment of localization in cel…	membrane; organelle membrane; cytoplasm; macromolecular complex; intracellular part; nuclear body; cell; organelle part; membrane-enclosed lumen; nucleoplasm; nuclear membrane; intracellular organelle lumen; nuclear speck; intracellular; cell part; perinuclear region of cytoplasm; membrane-bounded organelle; nucleoplasm part; organelle lumen; intracellular organelle; nuclear envelope; organelle e…	organic cyclic compound binding; heterocyclic compound binding; RNA binding; identical protein binding; ubiquitin protein ligase binding; binding; nucleic acid binding; protein binding; ubiquitin-like protein ligase binding; enzyme binding;	K14323	CASC3; protein CASC3	hsa03015 mRNA surveillance pathway - Homo sapiens (human); hsa03013 RNA transport - Homo sapiens (human);	IPR018545;	Btz domain;
O15245	524	T	Solute carrier family 22 member 1	SLC22A1	1	0.00187	49.188	GVALPET(1)MKDAENLGR	3	0.087833	1			plasma membrane	cellular component biogenesis; cellular component organization; regulation of biological quality; hormone transport; organic hydroxy compound transport; ion transmembrane transport; protein homooligomerization; single-organism process; ammonium transmembrane transport; response to stimulus; establishment of localization; protein oligomerization; organic cation transport; epinephrine transport; re…	basolateral plasma membrane; membrane; intrinsic component of plasma membrane; plasma membrane region; plasma membrane part; membrane part; cell part; cell periphery; intrinsic component of membrane; integral component of plasma membrane; cell; integral component of membrane; plasma membrane;	ammonium transmembrane transporter activity; active transmembrane transporter activity; secondary active transmembrane transporter activity; ion transmembrane transporter activity; protein dimerization activity; dopamine transmembrane transporter activity; organic hydroxy compound transmembrane transporter activity; substrate-specific transporter activity; protein binding; secondary active organi…	K08198	SLC22A1; MFS transporter, OCT family, solute carrier family 22 (organic cation transporter), member 1	hsa05231 Choline metabolism in cancer - Homo sapiens (human); hsa04976 Bile secretion - Homo sapiens (human);	IPR020846;	Major facilitator superfamily domain;
O15245	541	T	Solute carrier family 22 member 1	SLC22A1	0.999879	0.00202	96.342	ENT(1)IYLK	2	0.023386	8	0.373	0.263	plasma membrane	cellular component biogenesis; cellular component organization; regulation of biological quality; hormone transport; organic hydroxy compound transport; ion transmembrane transport; protein homooligomerization; single-organism process; ammonium transmembrane transport; response to stimulus; establishment of localization; protein oligomerization; organic cation transport; epinephrine transport; re…	basolateral plasma membrane; membrane; intrinsic component of plasma membrane; plasma membrane region; plasma membrane part; membrane part; cell part; cell periphery; intrinsic component of membrane; integral component of plasma membrane; cell; integral component of membrane; plasma membrane;	ammonium transmembrane transporter activity; active transmembrane transporter activity; secondary active transmembrane transporter activity; ion transmembrane transporter activity; protein dimerization activity; dopamine transmembrane transporter activity; organic hydroxy compound transmembrane transporter activity; substrate-specific transporter activity; protein binding; secondary active organi…	K08198	SLC22A1; MFS transporter, OCT family, solute carrier family 22 (organic cation transporter), member 1	hsa05231 Choline metabolism in cancer - Homo sapiens (human); hsa04976 Bile secretion - Homo sapiens (human);	IPR020846;	Major facilitator superfamily domain;
O15258	95	S	Protein RER1	RER1	0.999873	1.96e-09	95.622	VDPSLMEDS(1)DDGPSLPTK	3	-0.13426	7	1.028	0.752	plasma membrane	regulation of cellular process; neuromuscular junction development; cellular component organization; positive regulation of cellular protein localization; regulation of protein localization to plasma membrane; Golgi vesicle transport; single-organism process; localization within membrane; positive regulation of protein localization to plasma membrane; positive regulation of protein localization t…	intracellular organelle; membrane; bounding membrane of organelle; organelle membrane; cell periphery; intracellular organelle part; cytoplasm; Golgi membrane; intrinsic component of membrane; endomembrane system; intracellular part; integral component of Golgi membrane; cell; intrinsic component of Golgi membrane; integral component of membrane; organelle part; plasma membrane; intracellular mem…	acetylcholine receptor binding; protein binding; receptor binding; binding;
O15305	47	S	Phosphomannomutase 2	PMM2	1	0.0042	61.409	IGVVGGS(1)DFEK	2	0.39364	1			cytoplasm	nucleotide-sugar biosynthetic process; macromolecule glycosylation; establishment of protein localization to organelle; single-organism process; biosynthetic process; cellular metabolic process; protein transport; establishment of localization; protein targeting; metabolic process; establishment of localization in cell; carbohydrate derivative biosynthetic process; protein localization to endopla…	intracellular organelle; extracellular region part; cytoplasm; vesicle; neuronal cell body; intracellular part; cytosol; cell; extracellular region; organelle; extracellular exosome; intracellular membrane-bounded organelle; somatodendritic compartment; nucleus; intracellular; cell part; extracellular vesicle; cell body; membrane-bounded organelle; neuron part; extracellular organelle; cytoplasmi…	protein binding; phosphomannomutase activity; isomerase activity; intramolecular transferase activity; catalytic activity; binding; intramolecular transferase activity, phosphotransferases;	K17497	PMM; phosphomannomutase [EC:5.4.2.8]	hsa00051 Fructose and mannose metabolism - Homo sapiens (human); hsa01100 Metabolic pathways - Homo sapiens (human); hsa00520 Amino sugar and nucleotide sugar metabolism - Homo sapiens (human);	IPR023214;	HAD-like domain;
O15320	401	T	cTAGE family member 5	CTAGE5	0.999741	0.000644	84.297	KLT(1)VEENYR	3	0.82481	1			cytoplasm	cellular component biogenesis; cellular component organization; intracellular transport; cargo loading into vesicle; Golgi vesicle transport; single-organism process; protein transport; establishment of localization; establishment of localization in cell; single-organism localization; protein localization to endoplasmic reticulum; cellular component assembly; macromolecular complex assembly; posi…	membrane; intracellular organelle; nuclear outer membrane-endoplasmic reticulum membrane network; endoplasmic reticulum; cytoplasm; intracellular organelle part; intrinsic component of membrane; endomembrane system; intracellular part; cell; integral component of membrane; organelle part; intracellular membrane-bounded organelle; organelle; endoplasmic reticulum exit site; endoplasmic reticulum p…	protein binding; molecular function regulator; enzyme regulator activity; enzyme activator activity; binding;
O15320	635	S	cTAGE family member 5	CTAGE5	1	0.000354	81.017	LS(1)GPAELR	2	-0.48617	1			cytoplasm	cellular component biogenesis; cellular component organization; intracellular transport; cargo loading into vesicle; Golgi vesicle transport; single-organism process; protein transport; establishment of localization; establishment of localization in cell; single-organism localization; protein localization to endoplasmic reticulum; cellular component assembly; macromolecular complex assembly; posi…	membrane; intracellular organelle; nuclear outer membrane-endoplasmic reticulum membrane network; endoplasmic reticulum; cytoplasm; intracellular organelle part; intrinsic component of membrane; endomembrane system; intracellular part; cell; integral component of membrane; organelle part; intracellular membrane-bounded organelle; organelle; endoplasmic reticulum exit site; endoplasmic reticulum p…	protein binding; molecular function regulator; enzyme regulator activity; enzyme activator activity; binding;
O15320	596	S	cTAGE family member 5	CTAGE5	0.999904	4.57e-20	155.24	APS(0.008)DT(0.041)GS(0.951)LS(1)PPWDQDRR	3	-0.32006	39			cytoplasm	cellular component biogenesis; cellular component organization; intracellular transport; cargo loading into vesicle; Golgi vesicle transport; single-organism process; protein transport; establishment of localization; establishment of localization in cell; single-organism localization; protein localization to endoplasmic reticulum; cellular component assembly; macromolecular complex assembly; posi…	membrane; intracellular organelle; nuclear outer membrane-endoplasmic reticulum membrane network; endoplasmic reticulum; cytoplasm; intracellular organelle part; intrinsic component of membrane; endomembrane system; intracellular part; cell; integral component of membrane; organelle part; intracellular membrane-bounded organelle; organelle; endoplasmic reticulum exit site; endoplasmic reticulum p…	protein binding; molecular function regulator; enzyme regulator activity; enzyme activator activity; binding;
O15320	139	S	cTAGE family member 5	CTAGE5	0.80988	2.54e-12	126.4	S(0.19)NS(0.81)ELEDEILCLEK	3	-0.35011	1			cytoplasm	cellular component biogenesis; cellular component organization; intracellular transport; cargo loading into vesicle; Golgi vesicle transport; single-organism process; protein transport; establishment of localization; establishment of localization in cell; single-organism localization; protein localization to endoplasmic reticulum; cellular component assembly; macromolecular complex assembly; posi…	membrane; intracellular organelle; nuclear outer membrane-endoplasmic reticulum membrane network; endoplasmic reticulum; cytoplasm; intracellular organelle part; intrinsic component of membrane; endomembrane system; intracellular part; cell; integral component of membrane; organelle part; intracellular membrane-bounded organelle; organelle; endoplasmic reticulum exit site; endoplasmic reticulum p…	protein binding; molecular function regulator; enzyme regulator activity; enzyme activator activity; binding;
O15320	594	S	cTAGE family member 5	CTAGE5	0.99479	1.71e-11	113.51	APS(0.001)DT(0.007)GS(0.995)LS(0.998)PPWDQDR	3	-0.087217	17			cytoplasm	cellular component biogenesis; cellular component organization; intracellular transport; cargo loading into vesicle; Golgi vesicle transport; single-organism process; protein transport; establishment of localization; establishment of localization in cell; single-organism localization; protein localization to endoplasmic reticulum; cellular component assembly; macromolecular complex assembly; posi…	membrane; intracellular organelle; nuclear outer membrane-endoplasmic reticulum membrane network; endoplasmic reticulum; cytoplasm; intracellular organelle part; intrinsic component of membrane; endomembrane system; intracellular part; cell; integral component of membrane; organelle part; intracellular membrane-bounded organelle; organelle; endoplasmic reticulum exit site; endoplasmic reticulum p…	protein binding; molecular function regulator; enzyme regulator activity; enzyme activator activity; binding;
O15344	78	T	E3 ubiquitin-protein ligase Midline-1	MID1	1	0.00318	79.804	NVT(1)LQNIIDR	2	1.3198	1			nucleus	single organism signaling; regulation of stress-activated MAPK cascade; positive regulation of cellular protein metabolic process; cell surface receptor signaling pathway; negative regulation of microtubule polymerization or depolymerization; regulation of signaling; negative regulation of cellular component organization; positive regulation of intracellular signal transduction; cellular response…	intracellular organelle; polymeric cytoskeletal fiber; microtubule; intracellular non-membrane-bounded organelle; cytoskeletal part; cytoplasm; intracellular organelle part; macromolecular complex; supramolecular fiber; intracellular part; microtubule associated complex; cytosol; cell; supramolecular complex; spindle; organelle part; supramolecular polymer; non-membrane-bounded organelle; organel…	ubiquitin protein ligase binding; protein heterodimerization activity; ion binding; protein dimerization activity; tubulin binding; protein binding; zinc ion binding; phosphoprotein binding; cytoskeletal protein binding; identical protein binding; transition metal ion binding; catalytic activity; microtubule binding; binding; protein homodimerization activity; metal ion binding; cation binding; u…	K08285	TRIM18; midline 1 [EC:2.3.2.27]	hsa04120 Ubiquitin mediated proteolysis - Homo sapiens (human);	IPR003649; IPR006574; IPR001841; IPR001870; IPR017903; IPR003961; IPR013320; IPR000315; IPR003877; IPR027370; IPR013783; IPR013083; IPR003879;	B-box, C-terminal; SPRY-associated; Zinc finger, RING-type; B30.2/SPRY domain; COS domain; Fibronectin type III; Concanavalin A-like lectin/glucanase domain; B-box-type zinc finger; SPRY domain; RING-type zinc-finger, LisH dimerisation motif; Immunoglobulin-like fold; Zinc finger, RING/FYVE/PHD-type; Butyrophylin-like;
O15400	131	S	Syntaxin-7	STX7	0.766367	0.000993	70.009	VS(0.233)GS(0.766)FPEDSSK	2	0.077357	3	0.848	0.476	plasma membrane	cellular component biogenesis; positive regulation of adaptive immune response based on somatic recombination of immune receptors built from immunoglobulin superfamily domains; single-organism process; protein transport; establishment of localization; positive regulation of cell killing; regulation of plasma membrane organization; regulation of protein localization to cell periphery; establishmen…	membrane; extracellular region part; organelle membrane; cytoplasmic vesicle; cell periphery; membrane protein complex; cytoplasm; vesicle; cytoplasmic vesicle part; intrinsic component of membrane; macromolecular complex; intracellular part; cell; organelle part; early endosome; recycling endosome; lysosomal membrane; extracellular exosome; membrane part; cell part; intracellular; secretory vesi…	SNAP receptor activity; SNARE binding; ion channel inhibitor activity; channel regulator activity; binding; ion channel regulator activity; protein binding; chloride channel inhibitor activity; molecular function regulator; syntaxin binding; channel inhibitor activity; chloride channel regulator activity;	K08488	STX7; syntaxin 7	hsa04130 SNARE interactions in vesicular transport - Homo sapiens (human); hsa04145 Phagosome - Homo sapiens (human);	IPR000727; IPR010989; IPR006011;	Target SNARE coiled-coil homology domain; SNARE; Syntaxin, N-terminal domain;
O15400	173	S	Syntaxin-7	STX7	0.959927	1.64e-05	129.37	LIHERES(0.96)S(0.04)IR	3	1.4479	1	0.655	0.0211	plasma membrane	cellular component biogenesis; positive regulation of adaptive immune response based on somatic recombination of immune receptors built from immunoglobulin superfamily domains; single-organism process; protein transport; establishment of localization; positive regulation of cell killing; regulation of plasma membrane organization; regulation of protein localization to cell periphery; establishmen…	membrane; extracellular region part; organelle membrane; cytoplasmic vesicle; cell periphery; membrane protein complex; cytoplasm; vesicle; cytoplasmic vesicle part; intrinsic component of membrane; macromolecular complex; intracellular part; cell; organelle part; early endosome; recycling endosome; lysosomal membrane; extracellular exosome; membrane part; cell part; intracellular; secretory vesi…	SNAP receptor activity; SNARE binding; ion channel inhibitor activity; channel regulator activity; binding; ion channel regulator activity; protein binding; chloride channel inhibitor activity; molecular function regulator; syntaxin binding; channel inhibitor activity; chloride channel regulator activity;	K08488	STX7; syntaxin 7	hsa04130 SNARE interactions in vesicular transport - Homo sapiens (human); hsa04145 Phagosome - Homo sapiens (human);	IPR000727; IPR010989; IPR006011;	Target SNARE coiled-coil homology domain; SNARE; Syntaxin, N-terminal domain;
O15400	129	S	Syntaxin-7	STX7	0.750084	3.3e-05	107.65	VS(0.75)GS(0.25)FPEDSSK	3	0.28717	4	0.743	0.0912	plasma membrane	cellular component biogenesis; positive regulation of adaptive immune response based on somatic recombination of immune receptors built from immunoglobulin superfamily domains; single-organism process; protein transport; establishment of localization; positive regulation of cell killing; regulation of plasma membrane organization; regulation of protein localization to cell periphery; establishmen…	membrane; extracellular region part; organelle membrane; cytoplasmic vesicle; cell periphery; membrane protein complex; cytoplasm; vesicle; cytoplasmic vesicle part; intrinsic component of membrane; macromolecular complex; intracellular part; cell; organelle part; early endosome; recycling endosome; lysosomal membrane; extracellular exosome; membrane part; cell part; intracellular; secretory vesi…	SNAP receptor activity; SNARE binding; ion channel inhibitor activity; channel regulator activity; binding; ion channel regulator activity; protein binding; chloride channel inhibitor activity; molecular function regulator; syntaxin binding; channel inhibitor activity; chloride channel regulator activity;	K08488	STX7; syntaxin 7	hsa04130 SNARE interactions in vesicular transport - Homo sapiens (human); hsa04145 Phagosome - Homo sapiens (human);	IPR000727; IPR010989; IPR006011;	Target SNARE coiled-coil homology domain; SNARE; Syntaxin, N-terminal domain;
O15417	1540	S	Trinucleotide repeat-containing gene 18 protein	TNRC18	0.997029	3.48e-05	102.45	THAPS(0.003)ALS(0.997)PPR	3	-0.49476	3			nucleus	cellular component biogenesis; regulation of cellular process; cellular component organization; chromatin remodeling; regulation of macromolecule metabolic process; regulation of nucleobase-containing compound metabolic process; single-organism process; negative regulation of cellular process; negative regulation of cellular metabolic process; negative regulation of biological process; heterochro…	membrane; organelle membrane; cytoplasm; macromolecular complex; transcriptional repressor complex; intracellular part; cell; organelle part; nuclear transcriptional repressor complex; chromosomal part; non-membrane-bounded organelle; membrane-enclosed lumen; nucleoplasm; nuclear membrane; intracellular organelle lumen; cell part; intracellular; chromosome; membrane-bounded organelle; nucleoplasm…	organic cyclic compound binding; regulatory region DNA binding; heterocyclic compound binding; DNA binding; regulatory region nucleic acid binding; transcription regulatory region sequence-specific DNA binding; binding; transcription regulatory region DNA binding; double-stranded DNA binding; nucleic acid binding; sequence-specific double-stranded DNA binding; chromatin binding; sequence-specific…				IPR001025;	Bromo adjacent homology (BAH) domain;
O15417	1359	S	Trinucleotide repeat-containing gene 18 protein	TNRC18	1	8.18e-13	131.25	PLPS(1)PGAAGAQALEK	3	-0.090606	2			nucleus	cellular component biogenesis; regulation of cellular process; cellular component organization; chromatin remodeling; regulation of macromolecule metabolic process; regulation of nucleobase-containing compound metabolic process; single-organism process; negative regulation of cellular process; negative regulation of cellular metabolic process; negative regulation of biological process; heterochro…	membrane; organelle membrane; cytoplasm; macromolecular complex; transcriptional repressor complex; intracellular part; cell; organelle part; nuclear transcriptional repressor complex; chromosomal part; non-membrane-bounded organelle; membrane-enclosed lumen; nucleoplasm; nuclear membrane; intracellular organelle lumen; cell part; intracellular; chromosome; membrane-bounded organelle; nucleoplasm…	organic cyclic compound binding; regulatory region DNA binding; heterocyclic compound binding; DNA binding; regulatory region nucleic acid binding; transcription regulatory region sequence-specific DNA binding; binding; transcription regulatory region DNA binding; double-stranded DNA binding; nucleic acid binding; sequence-specific double-stranded DNA binding; chromatin binding; sequence-specific…				IPR001025;	Bromo adjacent homology (BAH) domain;
O15417	2146	T	Trinucleotide repeat-containing gene 18 protein	TNRC18	1	1.7e-05	108.06	GGAVERPLT(1)PAPR	2	0.26958	2			nucleus	cellular component biogenesis; regulation of cellular process; cellular component organization; chromatin remodeling; regulation of macromolecule metabolic process; regulation of nucleobase-containing compound metabolic process; single-organism process; negative regulation of cellular process; negative regulation of cellular metabolic process; negative regulation of biological process; heterochro…	membrane; organelle membrane; cytoplasm; macromolecular complex; transcriptional repressor complex; intracellular part; cell; organelle part; nuclear transcriptional repressor complex; chromosomal part; non-membrane-bounded organelle; membrane-enclosed lumen; nucleoplasm; nuclear membrane; intracellular organelle lumen; cell part; intracellular; chromosome; membrane-bounded organelle; nucleoplasm…	organic cyclic compound binding; regulatory region DNA binding; heterocyclic compound binding; DNA binding; regulatory region nucleic acid binding; transcription regulatory region sequence-specific DNA binding; binding; transcription regulatory region DNA binding; double-stranded DNA binding; nucleic acid binding; sequence-specific double-stranded DNA binding; chromatin binding; sequence-specific…				IPR001025;	Bromo adjacent homology (BAH) domain;
O15427	436	S	Monocarboxylate transporter 4	SLC16A3	1	0.000641	65.949	LHKPPADS(1)GVDLR	3	-0.3778	2			plasma membrane	cell migration; organic hydroxy compound transport; ion transmembrane transport; localization of cell; single-organism process; cellular metabolic process; anion transmembrane transport; organic substance metabolic process; establishment of localization; metabolic process; pyruvate metabolic process; single-organism localization; organic acid transmembrane transport; monocarboxylic acid transport…	intracellular organelle; membrane; intrinsic component of plasma membrane; organelle membrane; nuclear envelope; cell periphery; intracellular organelle part; organelle envelope; endomembrane system; intrinsic component of membrane; intracellular part; integral component of plasma membrane; cell; integral component of membrane; organelle part; plasma membrane; intracellular membrane-bounded organ…	organic acid transmembrane transporter activity; active transmembrane transporter activity; secondary active transmembrane transporter activity; RNA binding; ion transmembrane transporter activity; symporter activity; organic hydroxy compound transmembrane transporter activity; substrate-specific transporter activity; protein binding; lactate transmembrane transporter activity; monocarboxylic aci…	K08180	SLC16A3; MFS transporter, MCP family, solute carrier family 16 (monocarboxylic acid transporters), member 3	hsa05230 Central carbon metabolism in cancer - Homo sapiens (human);	IPR020846;	Major facilitator superfamily domain;
O15438	908	S	Canalicular multispecific organic anion transporter 2	ABCC3	0.933899	2.25e-16	129.85	QLS(0.934)ALS(0.066)SDGEGQGRPVPR	3	-0.14247	2	0.530	0.0204	plasma membrane	inorganic anion transmembrane transport; organic hydroxy compound transport; ion transmembrane transport; bile acid and bile salt transport; ATP hydrolysis coupled transmembrane transport; single-organism process; response to stimulus; anion transmembrane transport; establishment of localization; response to drug; single-organism localization; monocarboxylic acid transport; macromolecule localiza…	basolateral plasma membrane; membrane; intrinsic component of plasma membrane; plasma membrane region; plasma membrane part; membrane part; cell part; cell periphery; intrinsic component of membrane; integral component of plasma membrane; cell; integral component of membrane; plasma membrane;	ATPase coupled ion transmembrane transporter activity; nucleoside phosphate binding; primary active transmembrane transporter activity; xenobiotic transporter activity; lipid transporter activity; substrate-specific transporter activity; hydrolase activity, acting on acid anhydrides; hydrolase activity; substrate-specific transmembrane transporter activity; ATPase activity; organic cyclic compoun…	K05667	ABCC3; ATP-binding cassette, subfamily C (CFTR/MRP), member 3	hsa01523 Antifolate resistance - Homo sapiens (human); hsa04976 Bile secretion - Homo sapiens (human); hsa02010 ABC transporters - Homo sapiens (human);	IPR003593; IPR003439; IPR027417; IPR011527;	AAA+ ATPase domain; ABC transporter-like; P-loop containing nucleoside triphosphate hydrolase; ABC transporter type 1, transmembrane domain;
O15438	911	S	Canalicular multispecific organic anion transporter 2	ABCC3	0.760526	4.67e-05	58.373	QLS(0.024)ALS(0.761)S(0.216)DGEGQGRPVPR	3	0.17905	1	0.692	0.121	plasma membrane	inorganic anion transmembrane transport; organic hydroxy compound transport; ion transmembrane transport; bile acid and bile salt transport; ATP hydrolysis coupled transmembrane transport; single-organism process; response to stimulus; anion transmembrane transport; establishment of localization; response to drug; single-organism localization; monocarboxylic acid transport; macromolecule localiza…	basolateral plasma membrane; membrane; intrinsic component of plasma membrane; plasma membrane region; plasma membrane part; membrane part; cell part; cell periphery; intrinsic component of membrane; integral component of plasma membrane; cell; integral component of membrane; plasma membrane;	ATPase coupled ion transmembrane transporter activity; nucleoside phosphate binding; primary active transmembrane transporter activity; xenobiotic transporter activity; lipid transporter activity; substrate-specific transporter activity; hydrolase activity, acting on acid anhydrides; hydrolase activity; substrate-specific transmembrane transporter activity; ATPase activity; organic cyclic compoun…	K05667	ABCC3; ATP-binding cassette, subfamily C (CFTR/MRP), member 3	hsa01523 Antifolate resistance - Homo sapiens (human); hsa04976 Bile secretion - Homo sapiens (human); hsa02010 ABC transporters - Homo sapiens (human);	IPR003593; IPR003439; IPR027417; IPR011527;	AAA+ ATPase domain; ABC transporter-like; P-loop containing nucleoside triphosphate hydrolase; ABC transporter type 1, transmembrane domain;
O15439	646	T	Multidrug resistance-associated protein 4	ABCC4	0.941303	1.66e-06	94.359	KDNEESEQPPVPGT(0.941)PT(0.059)LR	3	0.58086	2			plasma membrane	inorganic anion transmembrane transport; cellular component biogenesis; acid secretion; ATP hydrolysis coupled transmembrane transport; prostaglandin transport; cilium assembly; single-organism process; cilium organization; establishment of localization; metabolic process; cellular component assembly; monocarboxylic acid transport; response to endogenous stimulus; macromolecule localization; sing…	basolateral plasma membrane; membrane; platelet dense granule; organelle membrane; cytoplasmic vesicle; cell periphery; vesicle; cytoplasm; platelet dense granule membrane; cytoplasmic vesicle part; intrinsic component of membrane; intracellular part; integral component of plasma membrane; cell; organelle part; plasma membrane region; intracellular; cell part; membrane part; whole membrane; secre…	ATPase coupled ion transmembrane transporter activity; nucleoside phosphate binding; primary active transmembrane transporter activity; substrate-specific transporter activity; hydrolase activity, acting on acid anhydrides; hydrolase activity; 15-hydroxyprostaglandin dehydrogenase (NAD+) activity; substrate-specific transmembrane transporter activity; ATPase activity; oxidoreductase activity, act…	K05673	ABCC4; ATP-binding cassette, subfamily C (CFTR/MRP), member 4	hsa04024 cAMP signaling pathway - Homo sapiens (human); hsa01523 Antifolate resistance - Homo sapiens (human); hsa04976 Bile secretion - Homo sapiens (human); hsa02010 ABC transporters - Homo sapiens (human);	IPR003593; IPR003439; IPR027417; IPR011527;	AAA+ ATPase domain; ABC transporter-like; P-loop containing nucleoside triphosphate hydrolase; ABC transporter type 1, transmembrane domain;
O15511	77	S	Actin-related protein 2/3 complex subunit 5	ARPC5	1	0.00659	78.516	AGS(1)IVLK	2	-0.066882	1			cytoplasm	single organism signaling; regulation of biological quality; leukocyte activation; cell surface receptor signaling pathway; brain development; regulation of actin filament length; actin cytoskeleton organization; regulation of cellular component size; regulation of cytoskeleton organization; orbitofrontal cortex development; single-organism transport; secretion; nervous system development; cellul…	secretory granule lumen; extracellular region part; cytoplasmic vesicle; cell junction; vesicle; cytoplasm; cytoplasmic vesicle part; macromolecular complex; growth cone; intracellular part; cell; ficolin-1-rich granule lumen; organelle part; non-membrane-bounded organelle; cytoskeleton; extracellular exosome; ficolin-1-rich granule; membrane-enclosed lumen; Arp2/3 protein complex; vesicle lumen;…	actin binding; protein binding; cytoskeletal protein binding; structural constituent of cytoskeleton; structural molecule activity; binding;	K05754	ARPC5; actin related protein 2/3 complex, subunit 5	hsa05100 Bacterial invasion of epithelial cells - Homo sapiens (human); hsa05132 Salmonella infection - Homo sapiens (human); hsa04666 Fc gamma R-mediated phagocytosis - Homo sapiens (human); hsa04144 Endocytosis - Homo sapiens (human); hsa05130 Pathogenic Escherichia coli infection - Homo sapiens (human); hsa05131 Shigellosis - Homo sapiens (human); hsa04810 Regulation of actin cytoskeleton - Ho…
O15523	592	S	ATP-dependent RNA helicase DDX3Y	DDX3Y	1	5.09e-05	101.2	FS(1)GGFGAR	2	-0.81339	4	0.513	0.00375	nucleus	peptide metabolic process; cellular aromatic compound metabolic process; regulation of macromolecule metabolic process; cellular protein metabolic process; biosynthetic process; organonitrogen compound biosynthetic process; cellular metabolic process; organic substance metabolic process; metabolic process; heterocycle metabolic process; nucleobase-containing compound metabolic process; translatio…	intracellular organelle; membrane; intracellular non-membrane-bounded organelle; cytoplasm; macromolecular complex; intracellular part; cell; cytosol; cytoplasmic ribonucleoprotein granule; non-membrane-bounded organelle; intracellular membrane-bounded organelle; organelle; nucleus; intracellular; cell part; ribonucleoprotein granule; ribonucleoprotein complex; membrane-bounded organelle; intrace…	nucleoside phosphate binding; ATP-dependent helicase activity; hydrolase activity, acting on acid anhydrides; hydrolase activity; ATPase activity; heterocyclic compound binding; organic cyclic compound binding; pyrophosphatase activity; catalytic activity; ribonucleotide binding; binding; purine ribonucleoside binding; ATP-dependent RNA helicase activity; anion binding; adenyl ribonucleotide bind…	K17642			IPR011545; IPR014014; IPR027417; IPR014001; IPR001650;	DEAD/DEAH box helicase domain; RNA helicase, DEAD-box type, Q motif; P-loop containing nucleoside triphosphate hydrolase; Helicase superfamily 1/2, ATP-binding domain; Helicase, C-terminal;
O15550	54	S	Lysine-specific demethylase 6A	KDM6A	1	0.0025	48.527	EALGGLDS(1)RLFGFVR	3	-1.7725	1			extracellular	single organism signaling; cell surface receptor signaling pathway; segmentation; tube formation; chordate embryonic development; histone demethylation; cellular metabolic process; protein alkylation; metabolic process; heart development; embryonic organ morphogenesis; macromolecule metabolic process; protein metabolic process; Wnt signaling pathway; embryo development; embryonic morphogenesis; n…	intracellular organelle; intracellular organelle part; macromolecular complex; nuclear lumen; histone methyltransferase complex; intracellular part; transferase complex; cell; organelle part; methyltransferase complex; organelle; intracellular membrane-bounded organelle; membrane-enclosed lumen; catalytic complex; nucleoplasm; nucleus; intracellular organelle lumen; cell part; intracellular; MLL3…	DNA binding; chromatin DNA binding; transcription regulatory region sequence-specific DNA binding; double-stranded DNA binding; ion binding; sequence-specific double-stranded DNA binding; RNA polymerase II regulatory region DNA binding; protein binding; chromatin binding; sequence-specific DNA binding; core promoter proximal region sequence-specific DNA binding; demethylase activity; oxidoreducta…	K11447	UTX; histone demethylase [EC:1.14.11.-]	hsa05202 Transcriptional misregulation in cancer - Homo sapiens (human);	IPR003347; IPR011990; IPR013026;	JmjC domain; Tetratricopeptide-like helical domain; Tetratricopeptide repeat-containing domain;
O15551	212	T	Claudin-3	CLDN3	0.777635	1.43e-05	96.012	S(0.968)T(0.032)GPGAS(0.222)LGT(0.778)GYDR	2	-0.73511	1			plasma membrane	regulation of cellular process; single organism signaling; cellular component biogenesis; cell junction assembly; cellular component organization; protein homooligomerization; response to abiotic stimulus; cellular developmental process; response to ethanol; cell-cell junction organization; response to oxygen-containing compound; cellular component morphogenesis; single-organism process; response…	membrane; extracellular region part; intrinsic component of plasma membrane; cell periphery; cell junction; vesicle; cytoplasm; intrinsic component of membrane; intracellular part; integral component of plasma membrane; cell-cell junction; cell; extracellular region; bicellular tight junction; integral component of membrane; lateral plasma membrane; apical junction complex; plasma membrane; extra…	signaling receptor activity; molecular transducer activity; identical protein binding; receptor activity; binding; protein binding; transmembrane signaling receptor activity; structural molecule activity; signal transducer activity; transmembrane receptor activity;	K06087	CLDN; claudin	hsa04670 Leukocyte transendothelial migration - Homo sapiens (human); hsa04530 Tight junction - Homo sapiens (human); hsa05130 Pathogenic Escherichia coli infection - Homo sapiens (human); hsa05160 Hepatitis C - Homo sapiens (human); hsa04514 Cell adhesion molecules (CAMs) - Homo sapiens (human);
O15551	209	S	Claudin-3	CLDN3	0.977631	0.000557	71.637	ST(0.001)GPGAS(0.978)LGT(0.021)GYDR	2	-0.90313	2			plasma membrane	regulation of cellular process; single organism signaling; cellular component biogenesis; cell junction assembly; cellular component organization; protein homooligomerization; response to abiotic stimulus; cellular developmental process; response to ethanol; cell-cell junction organization; response to oxygen-containing compound; cellular component morphogenesis; single-organism process; response…	membrane; extracellular region part; intrinsic component of plasma membrane; cell periphery; cell junction; vesicle; cytoplasm; intrinsic component of membrane; intracellular part; integral component of plasma membrane; cell-cell junction; cell; extracellular region; bicellular tight junction; integral component of membrane; lateral plasma membrane; apical junction complex; plasma membrane; extra…	signaling receptor activity; molecular transducer activity; identical protein binding; receptor activity; binding; protein binding; transmembrane signaling receptor activity; structural molecule activity; signal transducer activity; transmembrane receptor activity;	K06087	CLDN; claudin	hsa04670 Leukocyte transendothelial migration - Homo sapiens (human); hsa04530 Tight junction - Homo sapiens (human); hsa05130 Pathogenic Escherichia coli infection - Homo sapiens (human); hsa05160 Hepatitis C - Homo sapiens (human); hsa04514 Cell adhesion molecules (CAMs) - Homo sapiens (human);
O15551	203	S	Claudin-3	CLDN3	0.968156	1.43e-05	96.012	S(0.968)T(0.032)GPGAS(0.222)LGT(0.778)GYDR	2	-0.73511	2			plasma membrane	regulation of cellular process; single organism signaling; cellular component biogenesis; cell junction assembly; cellular component organization; protein homooligomerization; response to abiotic stimulus; cellular developmental process; response to ethanol; cell-cell junction organization; response to oxygen-containing compound; cellular component morphogenesis; single-organism process; response…	membrane; extracellular region part; intrinsic component of plasma membrane; cell periphery; cell junction; vesicle; cytoplasm; intrinsic component of membrane; intracellular part; integral component of plasma membrane; cell-cell junction; cell; extracellular region; bicellular tight junction; integral component of membrane; lateral plasma membrane; apical junction complex; plasma membrane; extra…	signaling receptor activity; molecular transducer activity; identical protein binding; receptor activity; binding; protein binding; transmembrane signaling receptor activity; structural molecule activity; signal transducer activity; transmembrane receptor activity;	K06087	CLDN; claudin	hsa04670 Leukocyte transendothelial migration - Homo sapiens (human); hsa04530 Tight junction - Homo sapiens (human); hsa05130 Pathogenic Escherichia coli infection - Homo sapiens (human); hsa05160 Hepatitis C - Homo sapiens (human); hsa04514 Cell adhesion molecules (CAMs) - Homo sapiens (human);
O15551	199	S	Claudin-3	CLDN3	1	0.000952	93.162	VVYS(1)APR	2	0.34683	2			plasma membrane	regulation of cellular process; single organism signaling; cellular component biogenesis; cell junction assembly; cellular component organization; protein homooligomerization; response to abiotic stimulus; cellular developmental process; response to ethanol; cell-cell junction organization; response to oxygen-containing compound; cellular component morphogenesis; single-organism process; response…	membrane; extracellular region part; intrinsic component of plasma membrane; cell periphery; cell junction; vesicle; cytoplasm; intrinsic component of membrane; intracellular part; integral component of plasma membrane; cell-cell junction; cell; extracellular region; bicellular tight junction; integral component of membrane; lateral plasma membrane; apical junction complex; plasma membrane; extra…	signaling receptor activity; molecular transducer activity; identical protein binding; receptor activity; binding; protein binding; transmembrane signaling receptor activity; structural molecule activity; signal transducer activity; transmembrane receptor activity;	K06087	CLDN; claudin	hsa04670 Leukocyte transendothelial migration - Homo sapiens (human); hsa04530 Tight junction - Homo sapiens (human); hsa05130 Pathogenic Escherichia coli infection - Homo sapiens (human); hsa05160 Hepatitis C - Homo sapiens (human); hsa04514 Cell adhesion molecules (CAMs) - Homo sapiens (human);
O42043	211	T	Endogenous retrovirus group K member 18 Env polyprotein	ERVK-18	0.994179	0.0604	44.318	GIS(0.006)T(0.994)PRPK	3	0.25844	1			plasma membrane		membrane; cell part; cell periphery; membrane part; virion; intrinsic component of membrane; cell; viral envelope; integral component of membrane; viral membrane; virion part; plasma membrane;	structural molecule activity;				IPR000328; IPR029104;	Retroviral envelope protein GP41-like; Retro-transcribing virus envelope glycoprotein;
O43150	701	S	Arf-GAP with SH3 domain, ANK repeat and PH domain-containing protein 2	ASAP2	1	7.88e-08	107.65	LLHEDLDES(1)DDDMDEK	3	-0.46333	3			nucleus	regulation of hydrolase activity; positive regulation of GTPase activity; positive regulation of hydrolase activity; regulation of catalytic activity; positive regulation of molecular function; regulation of molecular function; regulation of GTPase activity; biological regulation; positive regulation of catalytic activity;	intracellular organelle; membrane; Golgi cisterna membrane; bounding membrane of organelle; organelle membrane; cell periphery; cytoplasm; intracellular organelle part; Golgi membrane; endomembrane system; Golgi stack; intracellular part; cell; organelle part; plasma membrane; organelle; intracellular membrane-bounded organelle; intracellular; cell part; Golgi subcompartment; Golgi apparatus part…	enzyme regulator activity; nucleoside-triphosphatase regulator activity; binding; GTPase regulator activity; ion binding; cation binding; metal ion binding; protein binding; molecular function regulator; enzyme activator activity; GTPase activator activity;	K12488	ASAP; Arf-GAP with SH3 domain, ANK repeat and PH domain-containing protein	hsa04666 Fc gamma R-mediated phagocytosis - Homo sapiens (human); hsa04144 Endocytosis - Homo sapiens (human);	IPR001452; IPR027267; IPR011993; IPR020683; IPR001849;	SH3 domain; Arfaptin homology (AH) domain/BAR domain; PH domain-like; Ankyrin repeat-containing domain; Pleckstrin homology domain;
O43159	223	S	Ribosomal RNA-processing protein 8	RRP8	0.999696	0.00187	83.862	TEVS(1)PVPR	2	0.3905	1	1.643	0.0643	nucleus	cellular component biogenesis; single organism signaling; ribonucleoprotein complex biogenesis; nucleic acid-templated transcription; single-organism process; biosynthetic process; regulation of cell cycle process; cellular metabolic process; negative regulation of RNA metabolic process; methylation; response to external stimulus; regulation of RNA biosynthetic process; metabolic process; signal …	membrane; cell periphery; cytoplasm; macromolecular complex; transcriptional repressor complex; intracellular part; cell; heterochromatin; organelle part; nuclear transcriptional repressor complex; chromosomal part; non-membrane-bounded organelle; membrane-enclosed lumen; nucleoplasm; intracellular organelle lumen; intracellular; cell part; chromosome; membrane-bounded organelle; nucleoplasm part…	histone binding; organic cyclic compound binding; heterocyclic compound binding; RNA binding; S-adenosylmethionine-dependent methyltransferase activity; methyltransferase activity; methylated histone binding; catalytic activity; binding; nucleic acid binding; transferase activity, transferring one-carbon groups; protein binding; transferase activity;	K14850			IPR029063;	S-adenosyl-L-methionine-dependent methyltransferase;
O43159	176	S	Ribosomal RNA-processing protein 8	RRP8	0.93364	9.72e-11	113.73	QSPGS(0.001)T(0.065)S(0.934)PKPPHTLSR	4	-0.35142	10	1.423	0.325	nucleus	cellular component biogenesis; single organism signaling; ribonucleoprotein complex biogenesis; nucleic acid-templated transcription; single-organism process; biosynthetic process; regulation of cell cycle process; cellular metabolic process; negative regulation of RNA metabolic process; methylation; response to external stimulus; regulation of RNA biosynthetic process; metabolic process; signal …	membrane; cell periphery; cytoplasm; macromolecular complex; transcriptional repressor complex; intracellular part; cell; heterochromatin; organelle part; nuclear transcriptional repressor complex; chromosomal part; non-membrane-bounded organelle; membrane-enclosed lumen; nucleoplasm; intracellular organelle lumen; intracellular; cell part; chromosome; membrane-bounded organelle; nucleoplasm part…	histone binding; organic cyclic compound binding; heterocyclic compound binding; RNA binding; S-adenosylmethionine-dependent methyltransferase activity; methyltransferase activity; methylated histone binding; catalytic activity; binding; nucleic acid binding; transferase activity, transferring one-carbon groups; protein binding; transferase activity;	K14850			IPR029063;	S-adenosyl-L-methionine-dependent methyltransferase;
O43164	253	S	E3 ubiquitin-protein ligase Praja-2	PJA2	1	1.39e-45	196.43	SSAGDTEFVHQNS(1)QEIQR	3	-0.42647	1			nucleus	regulation of cellular process; single organism signaling; single-multicellular organism process; regulation of signaling; cellular protein metabolic process; single-organism process; response to stimulus; cellular metabolic process; neurological system process; organic substance metabolic process; behavior; metabolic process; signal transduction; regulation of cell communication; cell communicat…	membrane; nuclear outer membrane-endoplasmic reticulum membrane network; endoplasmic reticulum; organelle membrane; cell periphery; cell junction; cytoplasm; intracellular part; cell; asymmetric synapse; organelle part; non-membrane-bounded organelle; cytoskeleton; plasma membrane region; membrane part; intracellular; cell part; postsynaptic density; synaptic membrane; Golgi apparatus part; membr…	protein kinase A binding; ubiquitin-like protein transferase activity; protein kinase A regulatory subunit binding; protein kinase binding; ion binding; protein binding; ubiquitin-like protein ligase activity; kinase binding; zinc ion binding; ubiquitin protein ligase activity; transition metal ion binding; catalytic activity; binding; ubiquitin-protein transferase activity; cation binding; metal…	K10634			IPR001841; IPR013083;	Zinc finger, RING-type; Zinc finger, RING/FYVE/PHD-type;
O43166	1433	S	Signal-induced proliferation-associated 1-like protein 1	SIPA1L1	0.984778	1.37e-05	101.61	HS(0.015)AS(0.985)PVVFTSAR	3	0.51	2			nucleus	single organism signaling; regulation of biological quality; cell surface receptor signaling pathway; regulation of signaling; cellular developmental process; single-organism process; neurogenesis; signal transduction; actin cytoskeleton organization; regulation of cell communication; cell communication; positive regulation of molecular function; regulation of small GTPase mediated signal transdu…	dendrite; membrane; cell periphery; cell junction; cytoplasm; intracellular part; cell; asymmetric synapse; dendritic spine; non-membrane-bounded organelle; cytoskeleton; plasma membrane region; neuron spine; membrane part; intracellular; cell part; postsynaptic density; synaptic membrane; neuron projection; neuron part; neuron to neuron synapse; synapse part; intracellular organelle; cell projec…	enzyme regulator activity; receptor binding; nucleoside-triphosphatase regulator activity; binding; GTPase regulator activity; protein binding; ephrin receptor binding; molecular function regulator; enzyme activator activity; GTPase activator activity;	K17701	SIPA1L1; signal-induced proliferation-associated 1 like protein 1	hsa04015 Rap1 signaling pathway - Homo sapiens (human);	IPR021818; IPR001478; IPR000331;	Signal-induced proliferation-associated 1-like protein, C-terminal; PDZ domain; Rap GTPase activating protein domain;
O43166	1255	S	Signal-induced proliferation-associated 1-like protein 1	SIPA1L1	0.952224	2.28e-10	146.77	VLPAFRES(0.952)PS(0.048)GR	2	0.5879	4			nucleus	single organism signaling; regulation of biological quality; cell surface receptor signaling pathway; regulation of signaling; cellular developmental process; single-organism process; neurogenesis; signal transduction; actin cytoskeleton organization; regulation of cell communication; cell communication; positive regulation of molecular function; regulation of small GTPase mediated signal transdu…	dendrite; membrane; cell periphery; cell junction; cytoplasm; intracellular part; cell; asymmetric synapse; dendritic spine; non-membrane-bounded organelle; cytoskeleton; plasma membrane region; neuron spine; membrane part; intracellular; cell part; postsynaptic density; synaptic membrane; neuron projection; neuron part; neuron to neuron synapse; synapse part; intracellular organelle; cell projec…	enzyme regulator activity; receptor binding; nucleoside-triphosphatase regulator activity; binding; GTPase regulator activity; protein binding; ephrin receptor binding; molecular function regulator; enzyme activator activity; GTPase activator activity;	K17701	SIPA1L1; signal-induced proliferation-associated 1 like protein 1	hsa04015 Rap1 signaling pathway - Homo sapiens (human);	IPR021818; IPR001478; IPR000331;	Signal-induced proliferation-associated 1-like protein, C-terminal; PDZ domain; Rap GTPase activating protein domain;
O43166	286	S	Signal-induced proliferation-associated 1-like protein 1	SIPA1L1	0.920146	0.00597	51.495	S(0.92)KS(0.073)ET(0.005)GDS(0.001)S(0.001)IFR	3	-0.13101	1			nucleus	single organism signaling; regulation of biological quality; cell surface receptor signaling pathway; regulation of signaling; cellular developmental process; single-organism process; neurogenesis; signal transduction; actin cytoskeleton organization; regulation of cell communication; cell communication; positive regulation of molecular function; regulation of small GTPase mediated signal transdu…	dendrite; membrane; cell periphery; cell junction; cytoplasm; intracellular part; cell; asymmetric synapse; dendritic spine; non-membrane-bounded organelle; cytoskeleton; plasma membrane region; neuron spine; membrane part; intracellular; cell part; postsynaptic density; synaptic membrane; neuron projection; neuron part; neuron to neuron synapse; synapse part; intracellular organelle; cell projec…	enzyme regulator activity; receptor binding; nucleoside-triphosphatase regulator activity; binding; GTPase regulator activity; protein binding; ephrin receptor binding; molecular function regulator; enzyme activator activity; GTPase activator activity;	K17701	SIPA1L1; signal-induced proliferation-associated 1 like protein 1	hsa04015 Rap1 signaling pathway - Homo sapiens (human);	IPR021818; IPR001478; IPR000331;	Signal-induced proliferation-associated 1-like protein, C-terminal; PDZ domain; Rap GTPase activating protein domain;
O43166	1583	T	Signal-induced proliferation-associated 1-like protein 1	SIPA1L1	0.849967	8.88e-07	128.71	T(0.85)LS(0.148)DES(0.002)IYNSQR	2	0.45229	2			nucleus	single organism signaling; regulation of biological quality; cell surface receptor signaling pathway; regulation of signaling; cellular developmental process; single-organism process; neurogenesis; signal transduction; actin cytoskeleton organization; regulation of cell communication; cell communication; positive regulation of molecular function; regulation of small GTPase mediated signal transdu…	dendrite; membrane; cell periphery; cell junction; cytoplasm; intracellular part; cell; asymmetric synapse; dendritic spine; non-membrane-bounded organelle; cytoskeleton; plasma membrane region; neuron spine; membrane part; intracellular; cell part; postsynaptic density; synaptic membrane; neuron projection; neuron part; neuron to neuron synapse; synapse part; intracellular organelle; cell projec…	enzyme regulator activity; receptor binding; nucleoside-triphosphatase regulator activity; binding; GTPase regulator activity; protein binding; ephrin receptor binding; molecular function regulator; enzyme activator activity; GTPase activator activity;	K17701	SIPA1L1; signal-induced proliferation-associated 1 like protein 1	hsa04015 Rap1 signaling pathway - Homo sapiens (human);	IPR021818; IPR001478; IPR000331;	Signal-induced proliferation-associated 1-like protein, C-terminal; PDZ domain; Rap GTPase activating protein domain;
O43166	1632	S	Signal-induced proliferation-associated 1-like protein 1	SIPA1L1	0.995034	0.00799	53.237	RPS(0.995)YT(0.005)LGMK	3	-0.09907	1			nucleus	single organism signaling; regulation of biological quality; cell surface receptor signaling pathway; regulation of signaling; cellular developmental process; single-organism process; neurogenesis; signal transduction; actin cytoskeleton organization; regulation of cell communication; cell communication; positive regulation of molecular function; regulation of small GTPase mediated signal transdu…	dendrite; membrane; cell periphery; cell junction; cytoplasm; intracellular part; cell; asymmetric synapse; dendritic spine; non-membrane-bounded organelle; cytoskeleton; plasma membrane region; neuron spine; membrane part; intracellular; cell part; postsynaptic density; synaptic membrane; neuron projection; neuron part; neuron to neuron synapse; synapse part; intracellular organelle; cell projec…	enzyme regulator activity; receptor binding; nucleoside-triphosphatase regulator activity; binding; GTPase regulator activity; protein binding; ephrin receptor binding; molecular function regulator; enzyme activator activity; GTPase activator activity;	K17701	SIPA1L1; signal-induced proliferation-associated 1 like protein 1	hsa04015 Rap1 signaling pathway - Homo sapiens (human);	IPR021818; IPR001478; IPR000331;	Signal-induced proliferation-associated 1-like protein, C-terminal; PDZ domain; Rap GTPase activating protein domain;
O43166	1585	S	Signal-induced proliferation-associated 1-like protein 1	SIPA1L1	0.88199	3.21e-33	199.33	T(0.117)LS(0.882)DES(0.001)IYNSQR	3	-0.14153	6			nucleus	single organism signaling; regulation of biological quality; cell surface receptor signaling pathway; regulation of signaling; cellular developmental process; single-organism process; neurogenesis; signal transduction; actin cytoskeleton organization; regulation of cell communication; cell communication; positive regulation of molecular function; regulation of small GTPase mediated signal transdu…	dendrite; membrane; cell periphery; cell junction; cytoplasm; intracellular part; cell; asymmetric synapse; dendritic spine; non-membrane-bounded organelle; cytoskeleton; plasma membrane region; neuron spine; membrane part; intracellular; cell part; postsynaptic density; synaptic membrane; neuron projection; neuron part; neuron to neuron synapse; synapse part; intracellular organelle; cell projec…	enzyme regulator activity; receptor binding; nucleoside-triphosphatase regulator activity; binding; GTPase regulator activity; protein binding; ephrin receptor binding; molecular function regulator; enzyme activator activity; GTPase activator activity;	K17701	SIPA1L1; signal-induced proliferation-associated 1 like protein 1	hsa04015 Rap1 signaling pathway - Homo sapiens (human);	IPR021818; IPR001478; IPR000331;	Signal-induced proliferation-associated 1-like protein, C-terminal; PDZ domain; Rap GTPase activating protein domain;
O43166	288	S	Signal-induced proliferation-associated 1-like protein 1	SIPA1L1	0.97451	2.02e-07	125.5	S(0.004)KS(0.975)ET(0.02)GDS(0.001)SIFR	3	-0.042884	2			nucleus	single organism signaling; regulation of biological quality; cell surface receptor signaling pathway; regulation of signaling; cellular developmental process; single-organism process; neurogenesis; signal transduction; actin cytoskeleton organization; regulation of cell communication; cell communication; positive regulation of molecular function; regulation of small GTPase mediated signal transdu…	dendrite; membrane; cell periphery; cell junction; cytoplasm; intracellular part; cell; asymmetric synapse; dendritic spine; non-membrane-bounded organelle; cytoskeleton; plasma membrane region; neuron spine; membrane part; intracellular; cell part; postsynaptic density; synaptic membrane; neuron projection; neuron part; neuron to neuron synapse; synapse part; intracellular organelle; cell projec…	enzyme regulator activity; receptor binding; nucleoside-triphosphatase regulator activity; binding; GTPase regulator activity; protein binding; ephrin receptor binding; molecular function regulator; enzyme activator activity; GTPase activator activity;	K17701	SIPA1L1; signal-induced proliferation-associated 1 like protein 1	hsa04015 Rap1 signaling pathway - Homo sapiens (human);	IPR021818; IPR001478; IPR000331;	Signal-induced proliferation-associated 1-like protein, C-terminal; PDZ domain; Rap GTPase activating protein domain;
O43166	1270	S	Signal-induced proliferation-associated 1-like protein 1	SIPA1L1	1	0.00435	53.168	QDPVVHLS(1)PNK	3	-1.3769	1			nucleus	single organism signaling; regulation of biological quality; cell surface receptor signaling pathway; regulation of signaling; cellular developmental process; single-organism process; neurogenesis; signal transduction; actin cytoskeleton organization; regulation of cell communication; cell communication; positive regulation of molecular function; regulation of small GTPase mediated signal transdu…	dendrite; membrane; cell periphery; cell junction; cytoplasm; intracellular part; cell; asymmetric synapse; dendritic spine; non-membrane-bounded organelle; cytoskeleton; plasma membrane region; neuron spine; membrane part; intracellular; cell part; postsynaptic density; synaptic membrane; neuron projection; neuron part; neuron to neuron synapse; synapse part; intracellular organelle; cell projec…	enzyme regulator activity; receptor binding; nucleoside-triphosphatase regulator activity; binding; GTPase regulator activity; protein binding; ephrin receptor binding; molecular function regulator; enzyme activator activity; GTPase activator activity;	K17701	SIPA1L1; signal-induced proliferation-associated 1 like protein 1	hsa04015 Rap1 signaling pathway - Homo sapiens (human);	IPR021818; IPR001478; IPR000331;	Signal-induced proliferation-associated 1-like protein, C-terminal; PDZ domain; Rap GTPase activating protein domain;
O43175	78	T	D-3-phosphoglycerate dehydrogenase	PHGDH	1	1.28e-18	165.19	AGT(1)GVDNVDLEAATR	2	0.7372	2	0.471	0.00217	cytoplasm	organic acid biosynthetic process; chordate embryonic development; brain development; neuron development; cellular developmental process; neurogenesis; single-organism process; biosynthetic process; glycine metabolic process; cellular metabolic process; metabolic process; cellular amino acid metabolic process; alpha-amino acid biosynthetic process; monocarboxylic acid metabolic process; head deve…	extracellular region part; vesicle; cytoplasm; intracellular part; cytosol; cell; extracellular region; organelle; extracellular exosome; myelin sheath; intracellular; cell part; extracellular vesicle; membrane-bounded organelle; extracellular organelle; cytoplasmic part;	organic cyclic compound binding; heterocyclic compound binding; oxidoreductase activity, acting on CH-OH group of donors; electron carrier activity; oxidoreductase activity, acting on the CH-OH group of donors, NAD or NADP as acceptor; nucleoside phosphate binding; NAD binding; catalytic activity; binding; phosphoglycerate dehydrogenase activity; nucleotide binding; cofactor binding; small molecu…	K00058	serA; D-3-phosphoglycerate dehydrogenase [EC:1.1.1.95]	hsa01100 Metabolic pathways - Homo sapiens (human); hsa00260 Glycine, serine and threonine metabolism - Homo sapiens (human); hsa01230 Biosynthesis of amino acids - Homo sapiens (human); hsa01200 Carbon metabolism - Homo sapiens (human);	IPR006139; IPR006140; IPR029009; IPR016040;	D-isomer specific 2-hydroxyacid dehydrogenase, catalytic domain; D-isomer specific 2-hydroxyacid dehydrogenase, NAD-binding domain; Allosteric substrate binding domain; NAD(P)-binding domain;
O43175	14	S	D-3-phosphoglycerate dehydrogenase	PHGDH	0.999092	1.92e-05	107.74	VLIS(0.001)DS(0.999)LDPCCR	2	-0.29586	2	1.067	0.72	cytoplasm	organic acid biosynthetic process; chordate embryonic development; brain development; neuron development; cellular developmental process; neurogenesis; single-organism process; biosynthetic process; glycine metabolic process; cellular metabolic process; metabolic process; cellular amino acid metabolic process; alpha-amino acid biosynthetic process; monocarboxylic acid metabolic process; head deve…	extracellular region part; vesicle; cytoplasm; intracellular part; cytosol; cell; extracellular region; organelle; extracellular exosome; myelin sheath; intracellular; cell part; extracellular vesicle; membrane-bounded organelle; extracellular organelle; cytoplasmic part;	organic cyclic compound binding; heterocyclic compound binding; oxidoreductase activity, acting on CH-OH group of donors; electron carrier activity; oxidoreductase activity, acting on the CH-OH group of donors, NAD or NADP as acceptor; nucleoside phosphate binding; NAD binding; catalytic activity; binding; phosphoglycerate dehydrogenase activity; nucleotide binding; cofactor binding; small molecu…	K00058	serA; D-3-phosphoglycerate dehydrogenase [EC:1.1.1.95]	hsa01100 Metabolic pathways - Homo sapiens (human); hsa00260 Glycine, serine and threonine metabolism - Homo sapiens (human); hsa01230 Biosynthesis of amino acids - Homo sapiens (human); hsa01200 Carbon metabolism - Homo sapiens (human);	IPR006139; IPR006140; IPR029009; IPR016040;	D-isomer specific 2-hydroxyacid dehydrogenase, catalytic domain; D-isomer specific 2-hydroxyacid dehydrogenase, NAD-binding domain; Allosteric substrate binding domain; NAD(P)-binding domain;
O43187	144	S	Interleukin-1 receptor-associated kinase-like 2	IRAK2	0.791207	0.000908	57.315	MATFPGPGS(0.209)S(0.791)PAR	2	1.6484	2			cytoplasm	single organism signaling; positive regulation of cellular protein metabolic process; interleukin-1-mediated signaling pathway; cell surface receptor signaling pathway; nucleotide-binding domain, leucine rich repeat containing receptor signaling pathway; response to interleukin-1; regulation of defense response; cellular metabolic process; cellular response to cytokine stimulus; negative regulati…	endosome membrane; intracellular organelle; intracellular vesicle; membrane; bounding membrane of organelle; cytoplasmic vesicle; organelle membrane; cell periphery; cytoplasm; intracellular organelle part; vesicle; cytoplasmic vesicle part; endosomal part; endomembrane system; intracellular part; cytosol; cell; organelle part; plasma membrane; intracellular membrane-bounded organelle; organelle;…	nucleoside phosphate binding; phosphotransferase activity, alcohol group as acceptor; protein dimerization activity; protein binding; protein kinase activity; organic cyclic compound binding; heterocyclic compound binding; identical protein binding; kinase activity; catalytic activity; ribonucleotide binding; binding; purine ribonucleoside binding; anion binding; adenyl ribonucleotide binding; ad…	K04731	IRAK2; interleukin-1 receptor-associated kinase 2 [EC:2.7.11.1]	hsa05152 Tuberculosis - Homo sapiens (human); hsa04722 Neurotrophin signaling pathway - Homo sapiens (human);	IPR000488; IPR000719; IPR011029; IPR011009;	Death domain; Protein kinase domain; Death-like domain; Protein kinase-like domain;
O43194	256	S	G-protein coupled receptor 39	GPR39	0.99697	0.000379	69.485	GS(0.997)LAGGT(0.003)RPPQLR	3	-0.33123	1			plasma membrane	G-protein coupled receptor signaling pathway; regulation of cellular process; single organism signaling; cellular response to stimulus; signal transduction; regulation of biological process; cell communication; single-organism process; signaling; response to stimulus; cellular process; biological regulation;	membrane; intrinsic component of plasma membrane; plasma membrane part; membrane part; cell part; cell periphery; intrinsic component of membrane; integral component of plasma membrane; cell; integral component of membrane; plasma membrane;	signaling receptor activity; molecular transducer activity; receptor activity; binding; G-protein coupled receptor activity; ion binding; cation binding; metal ion binding; transmembrane signaling receptor activity; signal transducer activity; transmembrane receptor activity;	K08412			IPR017452;	GPCR, rhodopsin-like, 7TM;
O43236	117	S	Septin-4	SEPT4	0.846405	1.04e-31	153.06	LDPYDS(0.846)S(0.154)EDDKEYVGFATLPNQVHR	4	0.28695	1			cytoplasm	developmental maturation; regulation of cell death; positive regulation of cellular protein metabolic process; reproductive process; brain development; regulation of signaling; cellular developmental process; positive regulation of intracellular signal transduction; single-organism process; regulation of protein ubiquitination; regulation of apoptotic signaling pathway; regulation of cell communi…	sperm annulus; cell cortex; cell periphery; cytoplasmic region; cytoplasm; macromolecular complex; sperm flagellum; 9+2 motile cilium; intracellular part; cell; organelle part; non-membrane-bounded organelle; membrane-enclosed lumen; cytoskeleton; nucleoplasm; intracellular organelle lumen; ciliary part; myelin sheath; cell part; intracellular; septin cytoskeleton; septin complex; membrane-bounde…	nucleoside phosphate binding; nucleoside binding; ion binding; hydrolase activity, acting on acid anhydrides; hydrolase activity; protein binding; nucleotide binding; nucleoside-triphosphatase activity; heterocyclic compound binding; organic cyclic compound binding; ribonucleoside binding; carbohydrate derivative binding; pyrophosphatase activity; ribonucleotide binding; catalytic activity; bindi…	K16943	SEPT4; septin 4	hsa04210 Apoptosis - Homo sapiens (human); hsa04215 Apoptosis - multiple species - Homo sapiens (human);	IPR027417; IPR030379;	P-loop containing nucleoside triphosphate hydrolase; Septin-type guanine nucleotide-binding (G) domain;
O43236	325	S	Septin-4	SEPT4	0.999997	2.02e-15	118.63	IYQFPDCDS(1)DEDEDFKLQDQALK	4	-0.68034	3			cytoplasm	developmental maturation; regulation of cell death; positive regulation of cellular protein metabolic process; reproductive process; brain development; regulation of signaling; cellular developmental process; positive regulation of intracellular signal transduction; single-organism process; regulation of protein ubiquitination; regulation of apoptotic signaling pathway; regulation of cell communi…	sperm annulus; cell cortex; cell periphery; cytoplasmic region; cytoplasm; macromolecular complex; sperm flagellum; 9+2 motile cilium; intracellular part; cell; organelle part; non-membrane-bounded organelle; membrane-enclosed lumen; cytoskeleton; nucleoplasm; intracellular organelle lumen; ciliary part; myelin sheath; cell part; intracellular; septin cytoskeleton; septin complex; membrane-bounde…	nucleoside phosphate binding; nucleoside binding; ion binding; hydrolase activity, acting on acid anhydrides; hydrolase activity; protein binding; nucleotide binding; nucleoside-triphosphatase activity; heterocyclic compound binding; organic cyclic compound binding; ribonucleoside binding; carbohydrate derivative binding; pyrophosphatase activity; ribonucleotide binding; catalytic activity; bindi…	K16943	SEPT4; septin 4	hsa04210 Apoptosis - Homo sapiens (human); hsa04215 Apoptosis - multiple species - Homo sapiens (human);	IPR027417; IPR030379;	P-loop containing nucleoside triphosphate hydrolase; Septin-type guanine nucleotide-binding (G) domain;
O43237	407	S	Cytoplasmic dynein 1 light intermediate chain 2	DYNC1LI2	0.822655	0.000114	60.764	GGPAS(0.001)VPS(0.021)S(0.104)S(0.823)PGT(0.04)S(0.011)VK	3	0.27595	1			cytoplasm	organelle localization; intracellular transport; cellular component organization; Golgi vesicle transport; single-organism process; establishment of localization; establishment of localization in cell; cytoskeleton organization; antigen processing and presentation of exogenous peptide antigen; cellular process; microtubule organizing center localization; antigen processing and presentation of pep…	intracellular organelle; membrane; polymeric cytoskeletal fiber; microtubule; intracellular non-membrane-bounded organelle; cytoskeletal part; cytoplasm; intracellular organelle part; macromolecular complex; intracellular part; supramolecular fiber; microtubule associated complex; dynein complex; cytosol; cytoplasmic dynein complex; cell; supramolecular complex; organelle part; supramolecular pol…	ATP binding; motor activity; nucleoside phosphate binding; nucleoside binding; ion binding; hydrolase activity, acting on acid anhydrides; protein binding; hydrolase activity; nucleotide binding; nucleoside-triphosphatase activity; organic cyclic compound binding; heterocyclic compound binding; ribonucleoside binding; carbohydrate derivative binding; pyrophosphatase activity; catalytic activity; …	K10416	DYNC1LI; dynein light intermediate chain 1, cytosolic	hsa05132 Salmonella infection - Homo sapiens (human); hsa04145 Phagosome - Homo sapiens (human); hsa04962 Vasopressin-regulated water reabsorption - Homo sapiens (human);	IPR027417;	P-loop containing nucleoside triphosphate hydrolase;
O43290	448	S	U4/U6.U5 tri-snRNP-associated protein 1	SART1	1	3.12e-27	142.96	VS(1)EVEEEKEPVPQPLPSDDTR	3	-0.79645	7	0.938	0.605	nucleus	regulation of T cell activation; single organism signaling; cellular component biogenesis; regulation of leukocyte activation; ribonucleoprotein complex biogenesis; ribonucleoprotein complex assembly; single-organism process; regulation of lymphocyte activation; cellular metabolic process; positive regulation of leukocyte differentiation; signal transduction; metabolic process; ribonucleoprotein …	cytoplasm; macromolecular complex; intracellular part; nuclear body; cell; Cajal body; organelle part; membrane-enclosed lumen; spliceosomal tri-snRNP complex; catalytic complex; nucleoplasm; intracellular organelle lumen; nuclear speck; intracellular; cell part; membrane-bounded organelle; nucleoplasm part; organelle lumen; intracellular organelle; intracellular organelle part; U4/U6 x U5 tri-sn…	organic cyclic compound binding; heterocyclic compound binding; RNA binding; protein binding; binding; nucleic acid binding;	K11984	SART1; U4/U6.U5 tri-snRNP-associated protein 1	hsa03040 Spliceosome - Homo sapiens (human);
O43294	403	S	Transforming growth factor beta-1-induced transcript 1 protein	TGFB1I1	0.999997	4.99e-15	146.86	RGS(1)LCATCGLPVTGR	3	-0.30551	5	0.948	0.792	nucleus	single organism signaling; regulation of epithelial to mesenchymal transition; cell surface receptor signaling pathway; nucleic acid-templated transcription; positive regulation of biosynthetic process; negative regulation of cellular response to transforming growth factor beta stimulus; cellular metabolic process; negative regulation of cell proliferation; biological adhesion; positive regulatio…	intracellular organelle; intracellular non-membrane-bounded organelle; cell junction; intracellular organelle part; cytoplasm; anchoring junction; nuclear lumen; intracellular part; cell; organelle part; non-membrane-bounded organelle; membrane-enclosed lumen; organelle; cytoskeleton; intracellular membrane-bounded organelle; nucleus; intracellular organelle lumen; focal adhesion; intracellular; …	Roundabout binding; receptor binding; ion binding; protein binding; androgen receptor binding; hormone receptor binding; transcription cofactor activity; zinc ion binding; transition metal ion binding; binding; steroid hormone receptor binding; nuclear hormone receptor binding; transcription factor activity, transcription factor binding; metal ion binding; cation binding; transcription coactivato…				IPR001781;	Zinc finger, LIM-type;
O43306	54	S	Adenylate cyclase type 6	ADCY6	0.982511	1.61e-09	121.82	DAEPPS(0.983)PT(0.017)PAGPPR	3	-0.057353	2			plasma membrane	single organism signaling; positive regulation of lyase activity; regulation of biological quality; positive regulation of cellular protein metabolic process; positive regulation of biosynthetic process; cellular metabolic process; adenylate cyclase-inhibiting G-protein coupled receptor signaling pathway; ribose phosphate biosynthetic process; positive regulation of nucleotide biosynthetic proces…	cilium; membrane; intrinsic component of plasma membrane; cell projection; guanylate cyclase complex, soluble; cell periphery; cytoplasm; macromolecular complex; intrinsic component of membrane; intracellular part; cytosol; cell; integral component of membrane; plasma membrane; organelle; plasma membrane part; cell part; membrane part; intracellular; cytosolic part; protein complex; cytoplasmic p…	nucleoside phosphate binding; cyclase activity; protein kinase binding; protein binding; adenylate cyclase activity; guanylate cyclase activity; heterocyclic compound binding; organic cyclic compound binding; ribonucleotide binding; catalytic activity; binding; purine ribonucleoside binding; cation binding; anion binding; adenyl ribonucleotide binding; adenyl nucleotide binding; purine nucleotide…	K08046	ADCY6; adenylate cyclase 6 [EC:4.6.1.1]	hsa04072 Phospholipase D signaling pathway - Homo sapiens (human); hsa04015 Rap1 signaling pathway - Homo sapiens (human); hsa04723 Retrograde endocannabinoid signaling - Homo sapiens (human); hsa04022 cGMP-PKG signaling pathway - Homo sapiens (human); hsa04924 Renin secretion - Homo sapiens (human); hsa05166 HTLV-I infection - Homo sapiens (human); hsa04976 Bile secretion - Homo sapiens (human);…	IPR009398; IPR029787; IPR001054; IPR032628;	Adenylate cyclase, conserved domain; Nucleotide cyclase; Adenylyl cyclase class-3/4/guanylyl cyclase; Adenylate cyclase, N-terminal;
O43310	328	S	CBP80/20-dependent translation initiation factor	CTIF	1	0.00619	58.32	RKDS(1)ILPER	3	-0.17357	2			nucleus	regulation of cellular process; cellular aromatic compound metabolic process; posttranscriptional regulation of gene expression; regulation of macromolecule metabolic process; negative regulation of biological process; cellular metabolic process; organic substance metabolic process; cellular nitrogen compound catabolic process; metabolic process; nuclear-transcribed mRNA catabolic process, nonsen…	cell part; intracellular; cytoplasm; perinuclear region of cytoplasm; intracellular part; cytosol; cell; cytoplasmic part;	organic cyclic compound binding; heterocyclic compound binding; RNA binding; protein binding; binding; nucleic acid binding;				IPR016024; IPR003890; IPR016021;	Armadillo-type fold; MIF4G-like, type 3; MIF4G-like domain;
O43310	299	S	CBP80/20-dependent translation initiation factor	CTIF	0.999731	1.6e-89	220.14	S(1)PDTLAPVASER	2	1.0305	4			nucleus	regulation of cellular process; cellular aromatic compound metabolic process; posttranscriptional regulation of gene expression; regulation of macromolecule metabolic process; negative regulation of biological process; cellular metabolic process; organic substance metabolic process; cellular nitrogen compound catabolic process; metabolic process; nuclear-transcribed mRNA catabolic process, nonsen…	cell part; intracellular; cytoplasm; perinuclear region of cytoplasm; intracellular part; cytosol; cell; cytoplasmic part;	organic cyclic compound binding; heterocyclic compound binding; RNA binding; protein binding; binding; nucleic acid binding;				IPR016024; IPR003890; IPR016021;	Armadillo-type fold; MIF4G-like, type 3; MIF4G-like domain;
O43312	258	T	Metastasis suppressor protein 1	MTSS1	0.971765	2.85e-07	71.071	GSDYSWS(0.011)Y(0.011)QT(0.972)PPS(0.003)S(0.001)PS(0.001)TTMSR	3	0.33792	2	1.043	0.759	nucleus	cellular component biogenesis; single organism signaling; endomembrane system organization; renal tubule morphogenesis; cell surface receptor signaling pathway; nephron tubule development; cellular developmental process; single-organism process; negative regulation of cell proliferation; biological adhesion; actin cytoskeleton organization; signal transduction; tissue morphogenesis; cell communic…	intracellular vesicle; cell leading edge; intracellular organelle; cell projection; cytoplasmic vesicle; intracellular non-membrane-bounded organelle; vesicle; cytoplasm; intracellular part; cell; actin cytoskeleton; non-membrane-bounded organelle; cytoskeleton; organelle; intracellular; cell part; ruffle; endocytic vesicle; membrane-bounded organelle; cytoplasmic part;	cytoskeletal protein binding; identical protein binding; actin monomer binding; receptor binding; binding; actin binding; protein binding;	K20128			IPR003124; IPR013606;	WH2 domain; IMD/I-BAR domain;
O43314	38	S	Inositol hexakisphosphate and diphosphoinositol-pentakisphosphate kinase 2	PPIP5K2	1	7.3e-20	139.95	HFFHHADEDDEEEDDS(1)PPER	3	0.59181	5	0.847	0.296	nucleus	phosphorylation; organic hydroxy compound metabolic process; inositol metabolic process; alcohol metabolic process; inositol phosphate biosynthetic process; single-organism process; biosynthetic process; cellular metabolic process; phosphate-containing compound metabolic process; organic substance metabolic process; metabolic process; cellular carbohydrate metabolic process; cellular process; sin…	cell part; intracellular; cytoplasm; intracellular part; cell; cytosol; cytoplasmic part;	inositol hexakisphosphate kinase activity; diphosphoinositol-pentakisphosphate kinase activity; nucleoside phosphate binding; inositol-1,3,4,5,6-pentakisphosphate kinase activity; phosphatase activity; inositol hexakisphosphate 5-kinase activity; hydrolase activity; phosphotransferase activity, phosphate group as acceptor; organic cyclic compound binding; heterocyclic compound binding; kinase act…	K13024	PPIP5K; inositol-hexakisphosphate/diphosphoinositol-pentakisphosphate 1-kinase [EC:2.7.4.24]	hsa04070 Phosphatidylinositol signaling system - Homo sapiens (human);
O43314	1016	S	Inositol hexakisphosphate and diphosphoinositol-pentakisphosphate kinase 2	PPIP5K2	0.980001	0.000117	79.393	SGEQITS(0.002)S(0.018)PVS(0.98)PK	3	-0.046301	1			nucleus	phosphorylation; organic hydroxy compound metabolic process; inositol metabolic process; alcohol metabolic process; inositol phosphate biosynthetic process; single-organism process; biosynthetic process; cellular metabolic process; phosphate-containing compound metabolic process; organic substance metabolic process; metabolic process; cellular carbohydrate metabolic process; cellular process; sin…	cell part; intracellular; cytoplasm; intracellular part; cell; cytosol; cytoplasmic part;	inositol hexakisphosphate kinase activity; diphosphoinositol-pentakisphosphate kinase activity; nucleoside phosphate binding; inositol-1,3,4,5,6-pentakisphosphate kinase activity; phosphatase activity; inositol hexakisphosphate 5-kinase activity; hydrolase activity; phosphotransferase activity, phosphate group as acceptor; organic cyclic compound binding; heterocyclic compound binding; kinase act…	K13024	PPIP5K; inositol-hexakisphosphate/diphosphoinositol-pentakisphosphate 1-kinase [EC:2.7.4.24]	hsa04070 Phosphatidylinositol signaling system - Homo sapiens (human);
O43314	1006	S	Inositol hexakisphosphate and diphosphoinositol-pentakisphosphate kinase 2	PPIP5K2	0.99939	8.4e-06	107.65	S(0.999)GEQIT(0.001)SSPVSPK	3	0.94578	4	0.665	0.0172	nucleus	phosphorylation; organic hydroxy compound metabolic process; inositol metabolic process; alcohol metabolic process; inositol phosphate biosynthetic process; single-organism process; biosynthetic process; cellular metabolic process; phosphate-containing compound metabolic process; organic substance metabolic process; metabolic process; cellular carbohydrate metabolic process; cellular process; sin…	cell part; intracellular; cytoplasm; intracellular part; cell; cytosol; cytoplasmic part;	inositol hexakisphosphate kinase activity; diphosphoinositol-pentakisphosphate kinase activity; nucleoside phosphate binding; inositol-1,3,4,5,6-pentakisphosphate kinase activity; phosphatase activity; inositol hexakisphosphate 5-kinase activity; hydrolase activity; phosphotransferase activity, phosphate group as acceptor; organic cyclic compound binding; heterocyclic compound binding; kinase act…	K13024	PPIP5K; inositol-hexakisphosphate/diphosphoinositol-pentakisphosphate 1-kinase [EC:2.7.4.24]	hsa04070 Phosphatidylinositol signaling system - Homo sapiens (human);
O43318	439	S	Mitogen-activated protein kinase kinase kinase 7	MAP3K7	0.998114	7.11e-06	86.32	S(0.998)IQDLT(0.002)VTGT(0.001)EPGQVS(0.62)S(0.378)R	3	1.0297	1			nucleus	single organism signaling; regulation of leukocyte activation; regulation of stress-activated MAPK cascade; nucleotide-binding domain, leucine rich repeat containing receptor signaling pathway; regulation of defense response; positive regulation of NIK/NF-kappaB signaling; cellular metabolic process; regulation of protein serine/threonine kinase activity; metabolic process; activation of NF-kappa…	membrane; cytoplasmic vesicle; organelle membrane; cell periphery; vesicle; cytoplasm; cytoplasmic vesicle part; macromolecular complex; intracellular part; cell; histone acetyltransferase complex; organelle part; membrane-enclosed lumen; catalytic complex; nucleoplasm; protein acetyltransferase complex; intracellular organelle lumen; intracellular; cell part; whole membrane; endosome; membrane-b…	nucleoside phosphate binding; phosphotransferase activity, alcohol group as acceptor; scaffold protein binding; protein binding; protein kinase activity; signal transducer, downstream of receptor, with serine/threonine kinase activity; signal transducer activity; heterocyclic compound binding; organic cyclic compound binding; kinase activity; identical protein binding; ribonucleotide binding; cat…	K04427	MAP3K7; mitogen-activated protein kinase kinase kinase 7 [EC:2.7.11.25]	hsa04620 Toll-like receptor signaling pathway - Homo sapiens (human); hsa05168 Herpes simplex infection - Homo sapiens (human); hsa05169 Epstein-Barr virus infection - Homo sapiens (human); hsa05140 Leishmaniasis - Homo sapiens (human); hsa04152 AMPK signaling pathway - Homo sapiens (human); hsa05162 Measles - Homo sapiens (human); hsa04010 MAPK signaling pathway - Homo sapiens (human); hsa05418 …	IPR000719; IPR001245; IPR011009;	Protein kinase domain; Serine-threonine/tyrosine-protein kinase catalytic domain; Protein kinase-like domain;
O43318	389	S	Mitogen-activated protein kinase kinase kinase 7	MAP3K7	0.999695	0.00243	54.951	RMS(1)ADMSEIEAR	3	-0.59871	3			nucleus	single organism signaling; regulation of leukocyte activation; regulation of stress-activated MAPK cascade; nucleotide-binding domain, leucine rich repeat containing receptor signaling pathway; regulation of defense response; positive regulation of NIK/NF-kappaB signaling; cellular metabolic process; regulation of protein serine/threonine kinase activity; metabolic process; activation of NF-kappa…	membrane; cytoplasmic vesicle; organelle membrane; cell periphery; vesicle; cytoplasm; cytoplasmic vesicle part; macromolecular complex; intracellular part; cell; histone acetyltransferase complex; organelle part; membrane-enclosed lumen; catalytic complex; nucleoplasm; protein acetyltransferase complex; intracellular organelle lumen; intracellular; cell part; whole membrane; endosome; membrane-b…	nucleoside phosphate binding; phosphotransferase activity, alcohol group as acceptor; scaffold protein binding; protein binding; protein kinase activity; signal transducer, downstream of receptor, with serine/threonine kinase activity; signal transducer activity; heterocyclic compound binding; organic cyclic compound binding; kinase activity; identical protein binding; ribonucleotide binding; cat…	K04427	MAP3K7; mitogen-activated protein kinase kinase kinase 7 [EC:2.7.11.25]	hsa04620 Toll-like receptor signaling pathway - Homo sapiens (human); hsa05168 Herpes simplex infection - Homo sapiens (human); hsa05169 Epstein-Barr virus infection - Homo sapiens (human); hsa05140 Leishmaniasis - Homo sapiens (human); hsa04152 AMPK signaling pathway - Homo sapiens (human); hsa05162 Measles - Homo sapiens (human); hsa04010 MAPK signaling pathway - Homo sapiens (human); hsa05418 …	IPR000719; IPR001245; IPR011009;	Protein kinase domain; Serine-threonine/tyrosine-protein kinase catalytic domain; Protein kinase-like domain;
O43353	363	S	Receptor-interacting serine/threonine-protein kinase 2	RIPK2	1	0.000152	83.758	S(1)LPAPQDNDFLSR	3	-0.73594	2			cytoplasm	single organism signaling; regulation of leukocyte activation; regulation of cell death; regulation of stress-activated MAPK cascade; regulation of tumor necrosis factor production; defense response to other organism; positive regulation of biosynthetic process; peptidyl-tyrosine modification; nucleotide-binding domain, leucine rich repeat containing receptor signaling pathway; response to interl…	intracellular organelle; intracellular non-membrane-bounded organelle; vesicle; cytoplasm; macromolecular complex; intracellular part; cytosol; cell; non-membrane-bounded organelle; organelle; cytoskeleton; intracellular; cell part; protein complex; membrane-bounded organelle; cytoplasmic part;	nucleoside phosphate binding; phosphotransferase activity, alcohol group as acceptor; receptor binding; protein dimerization activity; CARD domain binding; protein tyrosine kinase activity; LIM domain binding; protein binding; protein kinase activity; signal transducer activity; heterocyclic compound binding; organic cyclic compound binding; kinase activity; identical protein binding; ribonucleot…	K08846	RIPK2; receptor-interacting serine/threonine-protein kinase 2 [EC:2.7.11.1]	hsa05152 Tuberculosis - Homo sapiens (human); hsa04722 Neurotrophin signaling pathway - Homo sapiens (human); hsa05131 Shigellosis - Homo sapiens (human); hsa04621 NOD-like receptor signaling pathway - Homo sapiens (human);	IPR000719; IPR001245; IPR011029; IPR011009; IPR001315;	Protein kinase domain; Serine-threonine/tyrosine-protein kinase catalytic domain; Death-like domain; Protein kinase-like domain; CARD domain;
O43353	529	S	Receptor-interacting serine/threonine-protein kinase 2	RIPK2	0.877086	0.00213	61.11	S(0.877)PS(0.123)LNLLQNK	3	1.6146	1			cytoplasm	single organism signaling; regulation of leukocyte activation; regulation of cell death; regulation of stress-activated MAPK cascade; regulation of tumor necrosis factor production; defense response to other organism; positive regulation of biosynthetic process; peptidyl-tyrosine modification; nucleotide-binding domain, leucine rich repeat containing receptor signaling pathway; response to interl…	intracellular organelle; intracellular non-membrane-bounded organelle; vesicle; cytoplasm; macromolecular complex; intracellular part; cytosol; cell; non-membrane-bounded organelle; organelle; cytoskeleton; intracellular; cell part; protein complex; membrane-bounded organelle; cytoplasmic part;	nucleoside phosphate binding; phosphotransferase activity, alcohol group as acceptor; receptor binding; protein dimerization activity; CARD domain binding; protein tyrosine kinase activity; LIM domain binding; protein binding; protein kinase activity; signal transducer activity; heterocyclic compound binding; organic cyclic compound binding; kinase activity; identical protein binding; ribonucleot…	K08846	RIPK2; receptor-interacting serine/threonine-protein kinase 2 [EC:2.7.11.1]	hsa05152 Tuberculosis - Homo sapiens (human); hsa04722 Neurotrophin signaling pathway - Homo sapiens (human); hsa05131 Shigellosis - Homo sapiens (human); hsa04621 NOD-like receptor signaling pathway - Homo sapiens (human);	IPR000719; IPR001245; IPR011029; IPR011009; IPR001315;	Protein kinase domain; Serine-threonine/tyrosine-protein kinase catalytic domain; Death-like domain; Protein kinase-like domain; CARD domain;
O43395	619	S	U4/U6 small nuclear ribonucleoprotein Prp3	PRPF3	1	4.34e-45	179.2	WDEQTSNTKGDDDEES(1)DEEAVKK	5	-0.51177	3	0.688	0.00952	nucleus	cellular component biogenesis; cellular component organization; ribonucleoprotein complex biogenesis; ribonucleoprotein complex assembly; cellular aromatic compound metabolic process; cellular metabolic process; organic substance metabolic process; mRNA splicing, via spliceosome; metabolic process; RNA splicing, via transesterification reactions with bulged adenosine as nucleophile; ribonucleopro…	cytoplasm; macromolecular complex; intracellular part; nuclear body; cell; Cajal body; organelle part; membrane-enclosed lumen; spliceosomal tri-snRNP complex; nucleoplasm; intracellular organelle lumen; nuclear speck; cell part; intracellular; membrane-bounded organelle; nucleoplasm part; organelle lumen; intracellular organelle; intracellular organelle part; U4/U6 x U5 tri-snRNP complex; nuclea…	organic cyclic compound binding; heterocyclic compound binding; RNA binding; protein binding; identical protein binding; binding; nucleic acid binding;	K12843	PRPF3; U4/U6 small nuclear ribonucleoprotein PRP3	hsa03040 Spliceosome - Homo sapiens (human);	IPR013881; IPR002483; IPR010541;	Pre-mRNA-splicing factor 3; PWI domain; Domain of unknown function DUF1115;
O43396	9	S	Thioredoxin-like protein 1	TXNL1	0.999825	2.37e-10	95.646	VGVKPVGS(1)DPDFQPELSGAGSR	3	-0.26775	2	0.431	0.0162	cytoplasm	regulation of cellular process; cellular response to stress; cellular response to stimulus; regulation of biological quality; response to stress; oxidation-reduction process; response to toxic substance; cell redox homeostasis; single-organism cellular process; cellular homeostasis; single-organism process; response to stimulus; homeostatic process; metabolic process; regulation of biological pro…	intracellular organelle; extracellular region part; proteasome complex; cytoplasm; vesicle; macromolecular complex; intracellular part; cytosol; cell; extracellular region; endopeptidase complex; organelle; extracellular exosome; intracellular membrane-bounded organelle; catalytic complex; nucleus; intracellular; cell part; extracellular vesicle; peptidase complex; protein complex; membrane-bound…	protein disulfide oxidoreductase activity; disulfide oxidoreductase activity; oxidoreductase activity, acting on NAD(P)H; catalytic activity; thioredoxin-disulfide reductase activity; protein-disulfide reductase activity; antioxidant activity; oxidoreductase activity, acting on a sulfur group of donors; oxidoreductase activity, acting on a sulfur group of donors, disulfide as acceptor; oxidoreduc…				IPR012336; IPR013766; IPR008979; IPR010400;	Thioredoxin-like fold; Thioredoxin domain; Galactose-binding domain-like; PITH domain;
O43396	113	S	Thioredoxin-like protein 1	TXNL1	0.999933	2.66e-08	109.65	QHLENDPGS(1)NEDTDIPK	3	-0.075871	1			cytoplasm	regulation of cellular process; cellular response to stress; cellular response to stimulus; regulation of biological quality; response to stress; oxidation-reduction process; response to toxic substance; cell redox homeostasis; single-organism cellular process; cellular homeostasis; single-organism process; response to stimulus; homeostatic process; metabolic process; regulation of biological pro…	intracellular organelle; extracellular region part; proteasome complex; cytoplasm; vesicle; macromolecular complex; intracellular part; cytosol; cell; extracellular region; endopeptidase complex; organelle; extracellular exosome; intracellular membrane-bounded organelle; catalytic complex; nucleus; intracellular; cell part; extracellular vesicle; peptidase complex; protein complex; membrane-bound…	protein disulfide oxidoreductase activity; disulfide oxidoreductase activity; oxidoreductase activity, acting on NAD(P)H; catalytic activity; thioredoxin-disulfide reductase activity; protein-disulfide reductase activity; antioxidant activity; oxidoreductase activity, acting on a sulfur group of donors; oxidoreductase activity, acting on a sulfur group of donors, disulfide as acceptor; oxidoreduc…				IPR012336; IPR013766; IPR008979; IPR010400;	Thioredoxin-like fold; Thioredoxin domain; Galactose-binding domain-like; PITH domain;
O43399	166	S	Tumor protein D54	TPD52L2	0.999988	1.35e-05	123.24	NSATFKS(1)FEDR	3	-0.032849	6	0.689	0.384	cytoplasm,nucleus	regulation of cellular process; regulation of biological process; regulation of cell proliferation; biological regulation;	cell part; intracellular; cytoplasm; perinuclear region of cytoplasm; intracellular part; cell; cytoplasmic part;	organic cyclic compound binding; heterocyclic compound binding; RNA binding; identical protein binding; protein heterodimerization activity; protein homodimerization activity; binding; protein dimerization activity; nucleic acid binding; protein binding;
O43399	21	S	Tumor protein D54	TPD52L2	0.897531	5.01e-12	114.76	GLLS(0.009)DS(0.898)MT(0.094)DVPVDTGVAAR	2	0.17186	2	0.715	0.143	cytoplasm,nucleus	regulation of cellular process; regulation of biological process; regulation of cell proliferation; biological regulation;	cell part; intracellular; cytoplasm; perinuclear region of cytoplasm; intracellular part; cell; cytoplasmic part;	organic cyclic compound binding; heterocyclic compound binding; RNA binding; identical protein binding; protein heterodimerization activity; protein homodimerization activity; binding; protein dimerization activity; nucleic acid binding; protein binding;
O43426	1220	T	Synaptojanin-1	SYNJ1	0.997486	0.00174	58.461	AS(0.001)AGRLT(0.997)PES(0.001)QSK	3	-0.10421	1			cytoplasm	cellular component biogenesis; single organism signaling; regulation of biological quality; alcohol metabolic process; neurotransmitter secretion; positive regulation of endosome organization; cellular lipid metabolic process; cellular metabolic process; neurological system process; lipid biosynthetic process; behavior; vesicle-mediated transport in synapse; metabolic process; cellular carbohydra…	membrane; organelle membrane; membrane protein complex; cell periphery; vesicle; cytoplasm; macromolecular complex; intracellular part; cell; axon terminus; organelle part; plasma membrane region; intracellular; cell part; presynapse; membrane part; whole membrane; membrane region; neuron projection; synaptic membrane; clathrin coat of coated pit; neuron projection terminus; membrane-bounded orga…	RNA binding; nucleoside phosphate binding; phosphatidylinositol-3-phosphatase activity; phosphatidylinositol-3,5-bisphosphate 3-phosphatase activity; phosphatase activity; phosphatidylinositol-4-phosphate phosphatase activity; hydrolase activity; phosphatidylinositol phosphate phosphatase activity; inositol tetrakisphosphate phosphatase activity; nucleotide binding; phosphatidylinositol phosphate…	K20279	SYNJ; synaptojanin [EC:3.1.3.36]	hsa00562 Inositol phosphate metabolism - Homo sapiens (human); hsa01100 Metabolic pathways - Homo sapiens (human); hsa04070 Phosphatidylinositol signaling system - Homo sapiens (human);	IPR000300; IPR000504; IPR012677; IPR005135; IPR002013; IPR015047;	Inositol polyphosphate-related phosphatase; RNA recognition motif domain; Nucleotide-binding alpha-beta plait domain; Endonuclease/exonuclease/phosphatase; SAC domain; Domain of unknown function DUF1866;
O43426	1565	S	Synaptojanin-1	SYNJ1	0.907376	0.0258	50.94	AS(0.907)PT(0.08)LDFT(0.012)ER	2	1.3077	1			cytoplasm	cellular component biogenesis; single organism signaling; regulation of biological quality; alcohol metabolic process; neurotransmitter secretion; positive regulation of endosome organization; cellular lipid metabolic process; cellular metabolic process; neurological system process; lipid biosynthetic process; behavior; vesicle-mediated transport in synapse; metabolic process; cellular carbohydra…	membrane; organelle membrane; membrane protein complex; cell periphery; vesicle; cytoplasm; macromolecular complex; intracellular part; cell; axon terminus; organelle part; plasma membrane region; intracellular; cell part; presynapse; membrane part; whole membrane; membrane region; neuron projection; synaptic membrane; clathrin coat of coated pit; neuron projection terminus; membrane-bounded orga…	RNA binding; nucleoside phosphate binding; phosphatidylinositol-3-phosphatase activity; phosphatidylinositol-3,5-bisphosphate 3-phosphatase activity; phosphatase activity; phosphatidylinositol-4-phosphate phosphatase activity; hydrolase activity; phosphatidylinositol phosphate phosphatase activity; inositol tetrakisphosphate phosphatase activity; nucleotide binding; phosphatidylinositol phosphate…	K20279	SYNJ; synaptojanin [EC:3.1.3.36]	hsa00562 Inositol phosphate metabolism - Homo sapiens (human); hsa01100 Metabolic pathways - Homo sapiens (human); hsa04070 Phosphatidylinositol signaling system - Homo sapiens (human);	IPR000300; IPR000504; IPR012677; IPR005135; IPR002013; IPR015047;	Inositol polyphosphate-related phosphatase; RNA recognition motif domain; Nucleotide-binding alpha-beta plait domain; Endonuclease/exonuclease/phosphatase; SAC domain; Domain of unknown function DUF1866;
O43432	1156	S	Eukaryotic translation initiation factor 4 gamma 3	EIF4G3	0.926432	2.08e-11	116.74	GGS(0.926)S(0.073)KDLLDNQSQEEQR	3	2.0191	3			nucleus	regulation of cellular process; peptide metabolic process; regulation of macromolecule metabolic process; posttranscriptional regulation of gene expression; cellular protein metabolic process; biosynthetic process; multi-organism cellular process; organonitrogen compound biosynthetic process; cellular metabolic process; organic substance metabolic process; metabolic process; regulation of biosynt…	cell part; intracellular; cytoplasm; macromolecular complex; intracellular part; protein complex; cytosol; cell; cytoplasmic part; eukaryotic translation initiation factor 4F complex;	organic cyclic compound binding; heterocyclic compound binding; translation factor activity, RNA binding; RNA binding; RNA cap binding; binding; nucleic acid binding; translation initiation factor activity; protein binding;	K03260	EIF4G; translation initiation factor 4G	hsa03013 RNA transport - Homo sapiens (human); hsa05416 Viral myocarditis - Homo sapiens (human);	IPR003307; IPR003891; IPR016024; IPR003890; IPR016021;	W2 domain; Initiation factor eIF-4 gamma, MA3; Armadillo-type fold; MIF4G-like, type 3; MIF4G-like domain;
O43432	230	S	Eukaryotic translation initiation factor 4 gamma 3	EIF4G3	0.922146	0.00186	85.676	S(0.922)PS(0.078)PVLR	2	0.089631	2			nucleus	regulation of cellular process; peptide metabolic process; regulation of macromolecule metabolic process; posttranscriptional regulation of gene expression; cellular protein metabolic process; biosynthetic process; multi-organism cellular process; organonitrogen compound biosynthetic process; cellular metabolic process; organic substance metabolic process; metabolic process; regulation of biosynt…	cell part; intracellular; cytoplasm; macromolecular complex; intracellular part; protein complex; cytosol; cell; cytoplasmic part; eukaryotic translation initiation factor 4F complex;	organic cyclic compound binding; heterocyclic compound binding; translation factor activity, RNA binding; RNA binding; RNA cap binding; binding; nucleic acid binding; translation initiation factor activity; protein binding;	K03260	EIF4G; translation initiation factor 4G	hsa03013 RNA transport - Homo sapiens (human); hsa05416 Viral myocarditis - Homo sapiens (human);	IPR003307; IPR003891; IPR016024; IPR003890; IPR016021;	W2 domain; Initiation factor eIF-4 gamma, MA3; Armadillo-type fold; MIF4G-like, type 3; MIF4G-like domain;
O43432	168	T	Eukaryotic translation initiation factor 4 gamma 3	EIF4G3	1	0.0352	68.355	NPT(1)PPIGR	2	-0.57382	1			nucleus	regulation of cellular process; peptide metabolic process; regulation of macromolecule metabolic process; posttranscriptional regulation of gene expression; cellular protein metabolic process; biosynthetic process; multi-organism cellular process; organonitrogen compound biosynthetic process; cellular metabolic process; organic substance metabolic process; metabolic process; regulation of biosynt…	cell part; intracellular; cytoplasm; macromolecular complex; intracellular part; protein complex; cytosol; cell; cytoplasmic part; eukaryotic translation initiation factor 4F complex;	organic cyclic compound binding; heterocyclic compound binding; translation factor activity, RNA binding; RNA binding; RNA cap binding; binding; nucleic acid binding; translation initiation factor activity; protein binding;	K03260	EIF4G; translation initiation factor 4G	hsa03013 RNA transport - Homo sapiens (human); hsa05416 Viral myocarditis - Homo sapiens (human);	IPR003307; IPR003891; IPR016024; IPR003890; IPR016021;	W2 domain; Initiation factor eIF-4 gamma, MA3; Armadillo-type fold; MIF4G-like, type 3; MIF4G-like domain;
O43488	259	T	Aflatoxin B1 aldehyde reductase member 2	AKR7A2	0.824786	0.000356	107.93	FFGNS(0.175)WAET(0.825)YR	2	0.94708	1	0.597	0.00749	mitochondria	cellular response to xenobiotic stimulus; cellular aromatic compound metabolic process; ammonium ion metabolic process; single-organism process; polyketide metabolic process; response to stimulus; cellular metabolic process; organic substance metabolic process; metabolic process; xenobiotic metabolic process; response to xenobiotic stimulus; cellular ketone metabolic process; carbohydrate derivat…	intracellular organelle; extracellular region part; vesicle; cytoplasm; endomembrane system; intracellular part; cell; cytosol; extracellular region; intracellular membrane-bounded organelle; organelle; extracellular exosome; intracellular; cell part; extracellular vesicle; Golgi apparatus; membrane-bounded organelle; extracellular organelle; cytoplasmic part;	alditol:NADP+ 1-oxidoreductase activity; hydrolase activity, acting on ether bonds; hydrolase activity; protein binding; phenanthrene-9,10-epoxide hydrolase activity; oxidoreductase activity; electron carrier activity; oxidoreductase activity, acting on CH-OH group of donors; oxidoreductase activity, acting on the CH-OH group of donors, NAD or NADP as acceptor; catalytic activity; epoxide hydrola…	K15303	AKR7; aflatoxin B1 aldehyde reductase	hsa00980 Metabolism of xenobiotics by cytochrome P450 - Homo sapiens (human);	IPR023210;	NADP-dependent oxidoreductase domain;
O43491	718	S	Band 4.1-like protein 2	EPB41L2	0.837285	0.00376	58.885	EIS(0.163)PGS(0.837)GPGEIR	2	1.4991	1			nucleus	actomyosin structure organization; cellular component organization; single-organism organelle organization; actin cytoskeleton organization; cortical actin cytoskeleton organization; organelle organization; actin filament-based process; single-organism cellular process; single-organism process; cortical cytoskeleton organization; cytoskeleton organization; cellular process; cellular component org…	membrane; extracellular region part; cell cortex; extrinsic component of membrane; cell periphery; cell junction; cytoplasmic region; vesicle; cytoplasm; cortical cytoskeleton; cortical actin cytoskeleton; intracellular part; cell; organelle part; non-membrane-bounded organelle; membrane-enclosed lumen; cytoskeleton; extracellular exosome; nucleoplasm; focal adhesion; intracellular organelle lume…	cytoskeletal protein binding; structural constituent of cytoskeleton; PH domain binding; binding; actin binding; protein binding; protein domain specific binding; structural molecule activity; spectrin binding;	K06107			IPR019748; IPR018980; IPR019749; IPR018979; IPR008379; IPR029071; IPR011993; IPR007477; IPR014847; IPR000299; IPR014352;	FERM central domain; FERM, C-terminal PH-like domain; Band 4.1 domain; FERM, N-terminal; Band 4.1, C-terminal; Ubiquitin-related domain; PH domain-like; SAB domain; FERM adjacent (FA); FERM domain; FERM/acyl-CoA-binding protein, 3-helical bundle;
O43491	87	S	Band 4.1-like protein 2	EPB41L2	0.998595	1.73e-06	153.7	S(0.999)YT(0.001)LVVAK	2	0.58294	7	0.608	0.209	nucleus	actomyosin structure organization; cellular component organization; single-organism organelle organization; actin cytoskeleton organization; cortical actin cytoskeleton organization; organelle organization; actin filament-based process; single-organism cellular process; single-organism process; cortical cytoskeleton organization; cytoskeleton organization; cellular process; cellular component org…	membrane; extracellular region part; cell cortex; extrinsic component of membrane; cell periphery; cell junction; cytoplasmic region; vesicle; cytoplasm; cortical cytoskeleton; cortical actin cytoskeleton; intracellular part; cell; organelle part; non-membrane-bounded organelle; membrane-enclosed lumen; cytoskeleton; extracellular exosome; nucleoplasm; focal adhesion; intracellular organelle lume…	cytoskeletal protein binding; structural constituent of cytoskeleton; PH domain binding; binding; actin binding; protein binding; protein domain specific binding; structural molecule activity; spectrin binding;	K06107			IPR019748; IPR018980; IPR019749; IPR018979; IPR008379; IPR029071; IPR011993; IPR007477; IPR014847; IPR000299; IPR014352;	FERM central domain; FERM, C-terminal PH-like domain; Band 4.1 domain; FERM, N-terminal; Band 4.1, C-terminal; Ubiquitin-related domain; PH domain-like; SAB domain; FERM adjacent (FA); FERM domain; FERM/acyl-CoA-binding protein, 3-helical bundle;
[truncated: 5,816 more rows]
